# Supplementary material for: Selective role of Nck1 in atherogenic inflammation and plaque formation
Source: JCI journal article supplement (doi:10.1172/jci135552), 2020-05-19

## SUPPLEMENTAL DATA:

### Supplemental Tables:

#### *Supplemental Table I. Antibodies, source, and applications.*

| Target                                       | Source                    | Catalog Number | Application | Working Concentration     |
|----------------------------------------------|---------------------------|----------------|-------------|---------------------------|
| Phospho-NF- $\kappa$ B (Ser536, p65 subunit) | Cell Signaling Technology | 3033           | WB          | 1:1000                    |
| NF- $\kappa$ B (p65 subunit)                 | Cell Signaling Technology | 4764           | WB          | 1:1000                    |
| NF- $\kappa$ B (p65 subunit)                 | Cell Signaling Technology | 6956           | IF-C        | 1:800                     |
| Nck1                                         | Cell Signaling Technology | 2319           | WB          | 1:1000                    |
| Nckb                                         | abcam                     | ab109239       | WB          | 0.45 $\mu$ g/ml           |
| Nck1/2                                       | Millipore                 | 06-288         | WB          | 0.1 $\mu$ g/ml            |
| VCAM-1                                       | abcam                     | ab134047       | WB/IHC-IF   | 0.44 $\mu$ g/ml           |
| GAPDH                                        | Cell Signaling Technology | 2118           | WB          | 1: 5000                   |
| von Willibrand Factor                        | abcam                     | ab11713        | IHC-IF      | 0.3 $\mu$ g/ml            |
| ICAM-1 (YN1/1.7.4)                           | abcam                     | ab119871       | IHC-IF      | 0.25 $\mu$ g/ml           |
| ICAM-1                                       | Santa Cruz                | sc-1511        | WB          | 0.5 $\mu$ g/ml            |
| Mac2                                         | Accurate Chemical         | CL8942AP       | IHC-IF      | 0.1 $\mu$ g/mL            |
| Smooth Muscle Actin                          | Sigma Aldrich             | C6198          | IHC-IF      | 0.25 $\mu$ g/ml           |
| Phospho-eNOS (Ser1177)                       | Cell Signaling Technology | 9571           | WB          | 1:500                     |
| Anti-eNOS/NOS Type III                       | BD Transduction Lab       | 610297         | WB          | 0.25 $\mu$ g/ml           |
| Phospho-Akt (Ser473)                         | Cell Signaling Technology | 4060           | WB          | 1:1000                    |
| AKT1/2 (N-19)                                | Santa Cruz                | sc-1619        | WB          | 0.2 $\mu$ g/ml            |
| ERK1                                         | Santa Cruz                | Sc-94          | WB          | 0.1 $\mu$ g/mL            |
| Phospho-p44/42 MAPK (ERK1/2)                 | Cell Signaling Technology | 4377           | WB          | 1:1000                    |
| IRAK-1 (D51G7)                               | Cell Signaling Technology | 4504           | WB/IP       | 1:1000 WB<br>1:100 IP     |
| Anti-IRAK-1 (phospho T209)                   | abcam                     | Ab218130       | WB/IHC-IF   | 1:1000 WB<br>1:100 IHC-IF |
| Human Nck1                                   | R&D Systems               | MAB7008        | IHC-IF      | 1:100                     |

**Supplemental Table II. Primers used for qRT-PCR.**

| <b>Gene</b>             | <b>Species</b> | <b>Forward</b>          | <b>Reverse</b>              |
|-------------------------|----------------|-------------------------|-----------------------------|
| <b>β2-microglobulin</b> | Mouse          | TTCTGGTGCTTGTCTCACTGA   | CAGTATGTTCCGGCTTCCCATTC     |
| <b>Rpl13a</b>           | Mouse          | GGGCAGGTTCTGGTATTGGAT   | GGCTCGGAAATGGTAGGGG         |
| <b>β2-microglobulin</b> | Human          | AGCATTCTGGGCGGAGATGTCT  | CTGCTGGATGACGTGAGTAA<br>CCT |
| <b>Rpl13a</b>           | Human          | GCCATCGTGGCTAAACAGGTA   | GTTGGTGTTTCATCCGCTTGC       |
| <b>VCAM-1</b>           | Mouse          | TCAAAGAAAGGGAGACTG      | GCTGGAGAACTTCATTATC         |
| <b>VCAM-1</b>           | Human          | ATGAGGGGACCACATCTACG    | CACCTGGATTCTTTTTCCA         |
| <b>ICAM-1</b>           | Human          | TGTCCCCCTCAAAAGTCATC    | TAGGCAACGGGGTCTCTATG        |
| <b>ICAM-1</b>           | Mouse          | CTGGCTGTCACAGAACAGGA    | AAAGTAGGTGGGGAGGTGCT        |
| <b>KLF2</b>             | Mouse          | AGAATGCACCTGAGCCTGCTAG  | AATTTCCCCGAAAGCCTGC         |
| <b>SMA</b>              | Mouse          | GGACGTACAACCTGGTATTGTGC | CGGCAGTAGTCACGAAGGAAT       |
| <b>Nck2</b>             | Mouse          | GTCATAGCCAAGTGGGACTACA  | GCACGTAGCCTGTCCTGTT         |
| <b>PECAM-1</b>          | Mouse          | GGAGTCAGAACCCATCAGGA    | CAGCTGGTCCCCTTCTATGA        |

**Supplemental Table III: Genotyping Primers:**

| <b>Gene</b>      | <b>Sequence</b>                   |
|------------------|-----------------------------------|
| <b>Nck1</b>      | GCATGTAGACAATTACACTTC AGC ACC     |
|                  | ATTCATGGAATTTGGAAGCTCGCCACC       |
|                  | CTGATTGAAGCAGAAGCCTGCGATG         |
|                  | TATTGGCTTCATCCACCACATACAGG        |
| <b>APOE</b>      | GCCGCCCCGACTGCATCT                |
|                  | TGTGACTTGGGAGCTCTGCAGC            |
|                  | GCCTAGCCGAGGGAGAGCCG              |
| <b>VeCad Cre</b> | ACT GGG ATC TTC GAA CTC TTT GGA C |
|                  | GAT GTT GGG GCA CTG CTC ATT CAC C |
|                  | CCA TCT GCC ACC AGC CAG           |
|                  | TCG CCA TCT TCC AGC AGG           |
| <b>Nck2</b>      | GGA TAC CAC CAT TGG CAT TAG TAG   |
|                  | GTG CTC ATT TGA CAA GTG ACA C     |

## Supplemental Figures:

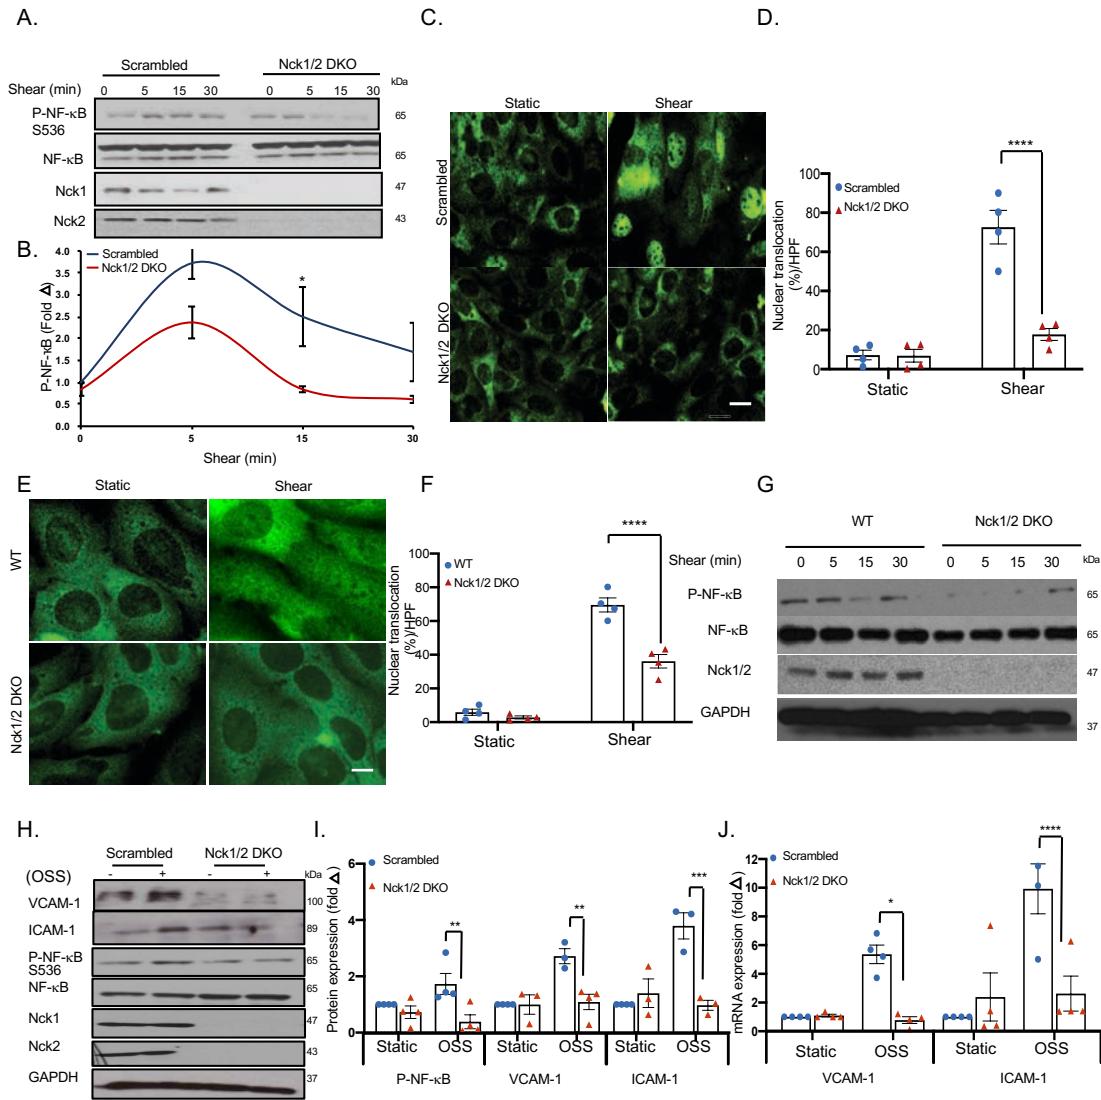

**Supplemental Figure 1. A/B)** Nck1/2 was deleted from HAECs using CRISPR/Cas9 editing, and shear stress-induced NF-κB activation was assessed by **(A/B)** Western blotting for p65 phosphorylation and **(C/D)** staining for p65 nuclear translocation. **E-G) Mouse aortic endothelial cells (MAECs) from iEC-Nck1/2 DKO and wild type (WT) were isolated and subjected to shear stress.** NF-κB activation was assessed by analysis of p65 nuclear translocation and **(E/F)** p65 Ser536 phosphorylation **(G)**, showing significant reduction in Nck1/2 DKO MAECs compared to Wild-type cells (WT). Data are mean ± SEM, analyzed by unpaired student *t* test, *n*=4, \*\*\*\**p*<0.001. Scale bar=50μm. **H/I)** Nck1/2 was deleted from HAECs using CRISPR/Cas9 and OSS-induced proinflammatory gene expression and signaling was assessed by Western blotting. **J)** HAECs were treated as in **(H)** & **(I)**, and mRNA expression was assessed by qRT-PCR. Data are mean ± SEM, *n*=3-4, analyzed by 2-Way ANOVA followed by Bonferroni's post-test, \**p*<0.05, \*\**p*<0.01, \*\*\**p*<0.001, \*\*\*\**p*<0.0001.

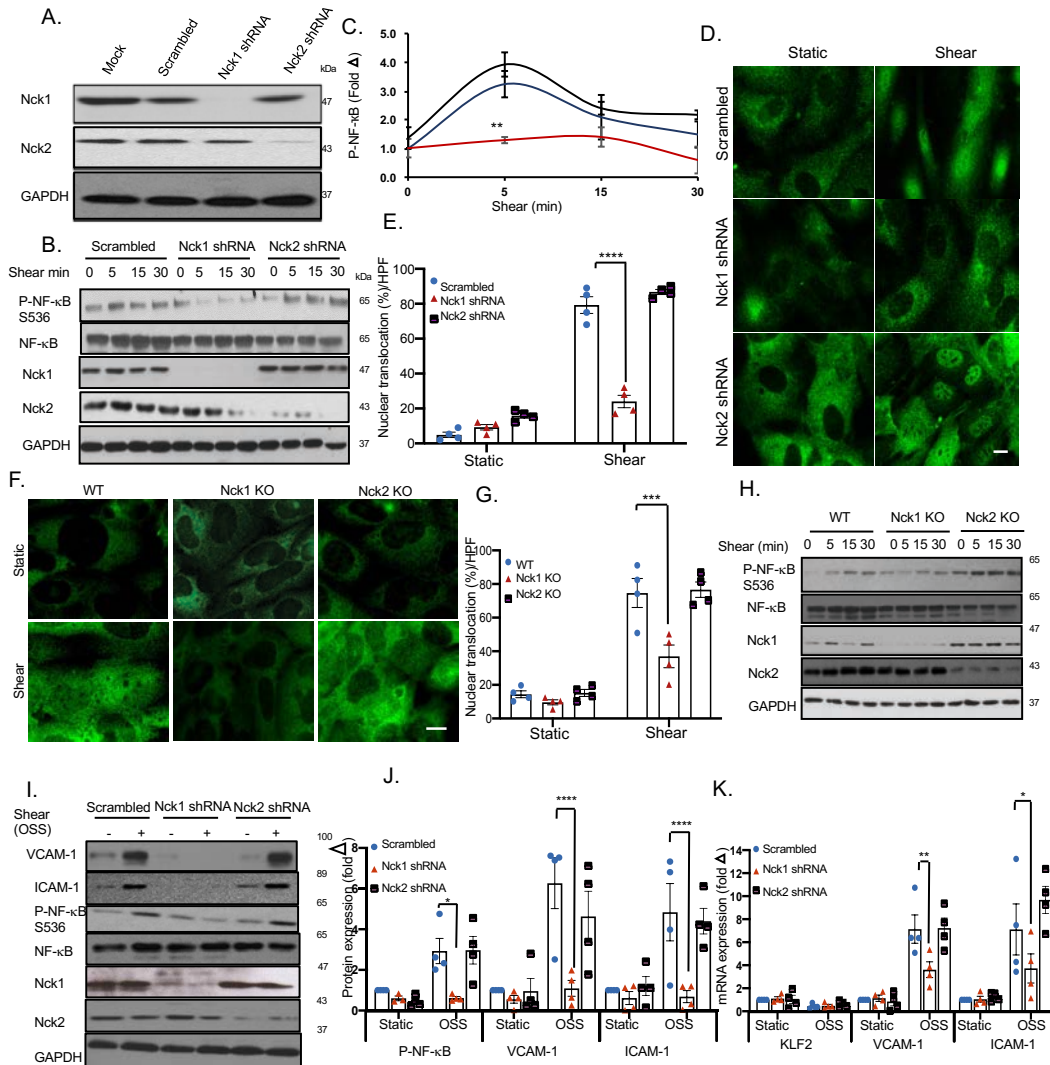

**Supplemental Figure 2. A)** Lentiviral Nck1 and Nck2 knocking down by shRNA. **B-E)** HAECs expressing either Nck1 shRNA or Nck2 shRNA were subjected to acute shear stress for the indicated times, and NF-κB activation was assessed by measuring **(B/C)** NF-κB phosphorylation and **(D/E)** nuclear translocation. Scale bars=50μm. Data are mean ± SEM, n=4, analyzed by 2-Way ANOVA followed by Bonferroni's post-test, \*\*p<0.01, \*\*\*\*P<0.0001. **F-H)** Mouse aortic endothelial cells (MAECs) from Nck1 KO, iEC-Nck2 KO, or Wild type (WT) were isolated and subjected to shear stress. **F/G)** NF-κB activation was assessed by analysis of p65 nuclear translocation and **(H)** p65 Ser536 phosphorylation, showing significant reduction in Nck1 KO MAECs compared to Wild-type cells (WT). Data are mean ± SEM, analyzed by 1-Way ANOVA, and Tukey's post-test, n=4, \*\*\*p<0.001. Scale bar=50μm. **I/J)** HAECs were transfected with either Nck1 or Nck2 shRNA, and oscillatory shear stress (OSS, 18h) induced proinflammatory gene expression (ICAM-1/VCAM-1) and signaling (P-NF-κB Ser536) were assessed by Western blotting. **K)** mRNA expression as assessed by qRT-PCR. Data are from n=4, analyzed by 2-Way ANOVA and Bonferroni's post-test, \*p<0.05, \*\*p<0.01, \*\*\*\*p<0.0001.

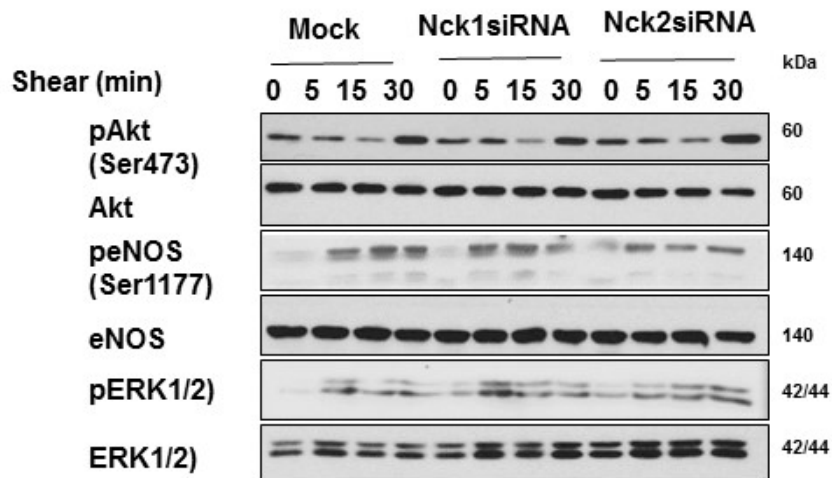

**Supplemental Figure 3.** Endothelial cells subjected to acute shear stress for the indicated times, and activation of Akt, eNOS, and ERK1/2 assessed by Western blotting. Representative blots are from n=4.

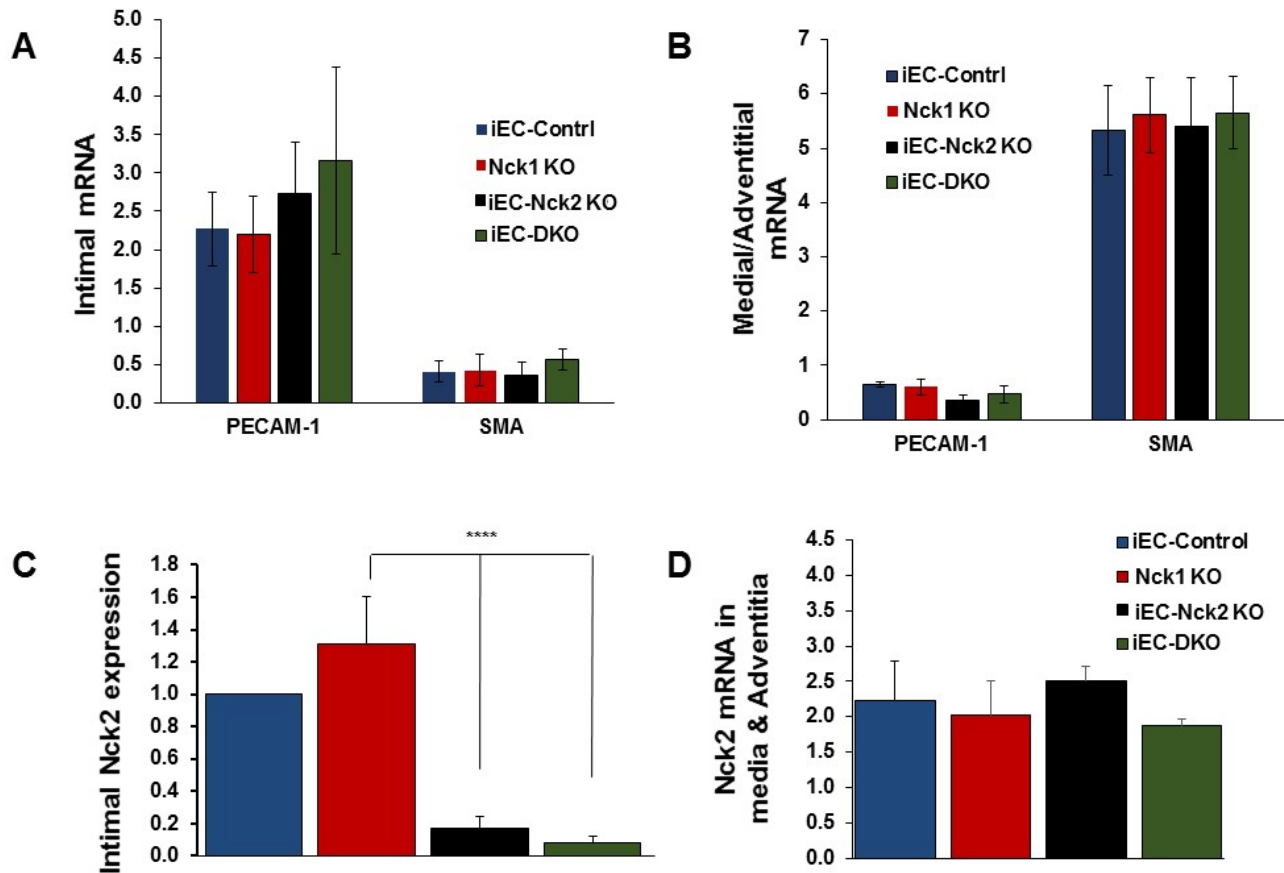

**Supplemental Figure 4.** A/B) Intimal mRNA and Medial/Adventitial mRNA were obtained 2 days post-ligation surgery from right and ligated left carotid arteries. mRNA levels were assessed for the endothelial marker gene platelet endothelial cell adhesion molecule-1 (PECAM-1) and the smooth muscle marker gene  $\alpha$ -smooth muscle actin (SMA). C/D) Nck2 mRNA expression after tamoxifen injection shows selective Nck2 depletion from the intima and not the media/adventitia. Graphs are mean  $\pm$  SEM, n=7-10/group. Data analyzed by 1-Way ANOVA and Tukey's post-test, \*\*\*\*p<0.0001.

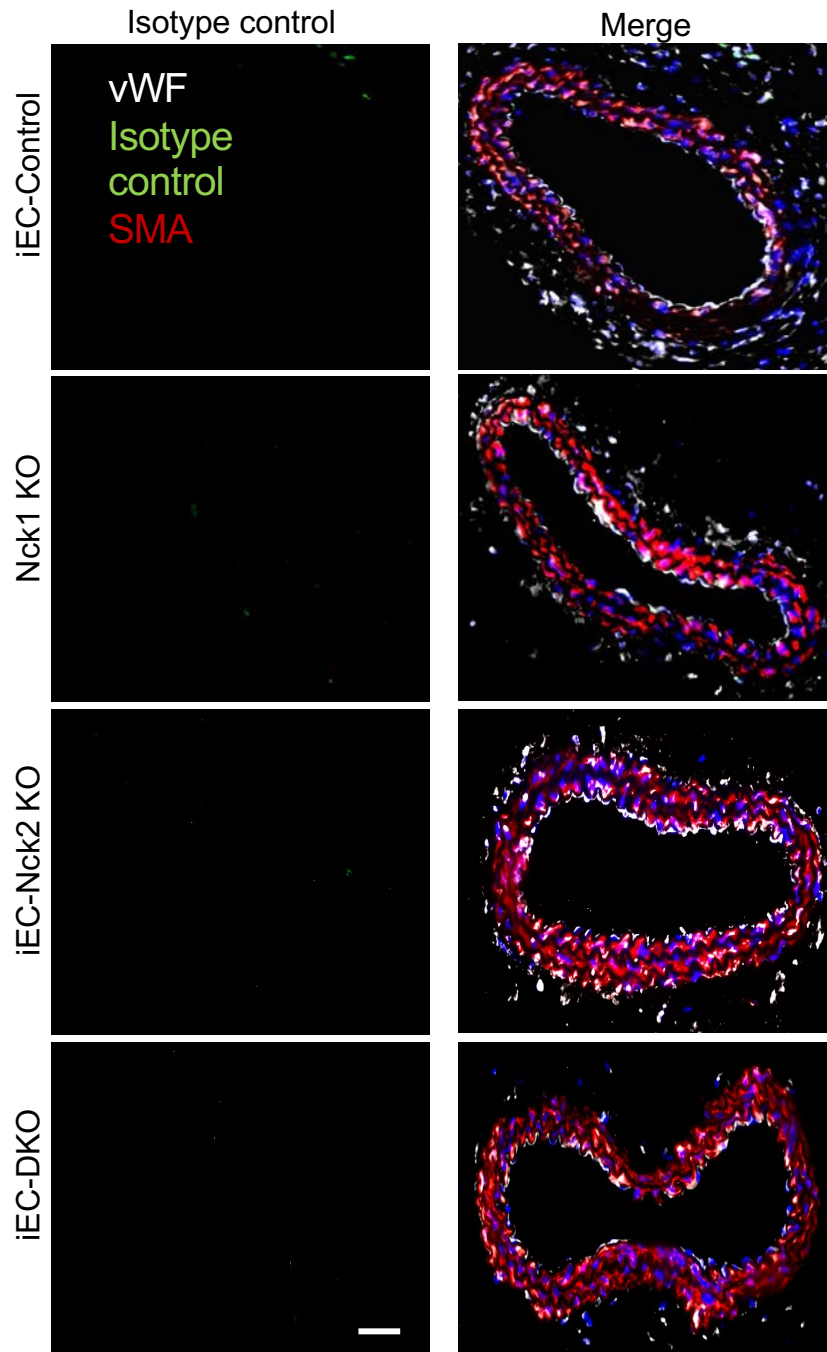

**Supplemental Figure 5.** Isotype control staining for mac-2 in the ligated carotid arteries among experimental groups. Smooth muscle cells ( $\alpha$ -smooth muscle actin (SMA), red), and endothelium (vWF, white). Scale bars=200 $\mu$ m



**A.**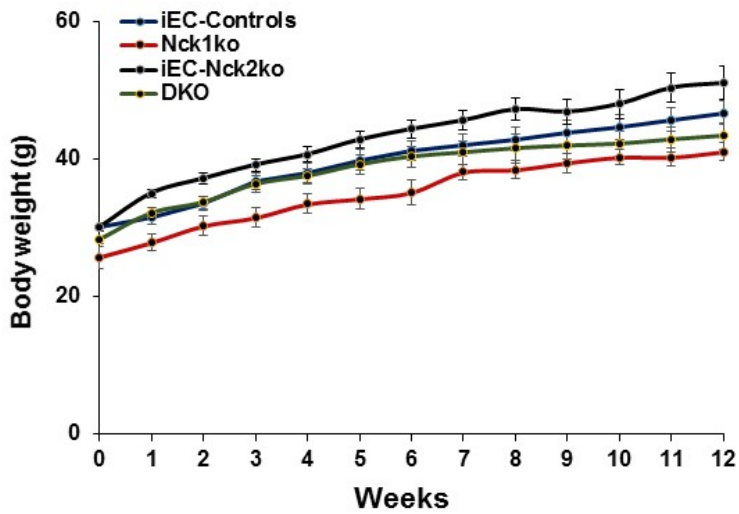**B.**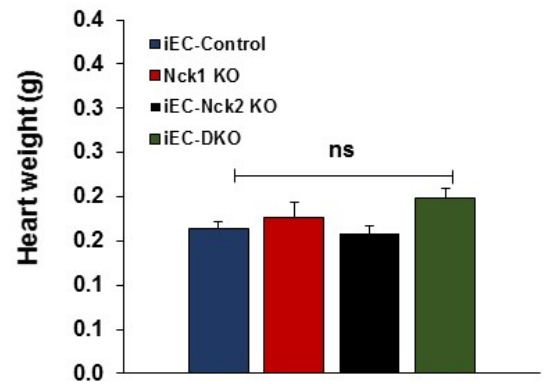**C.**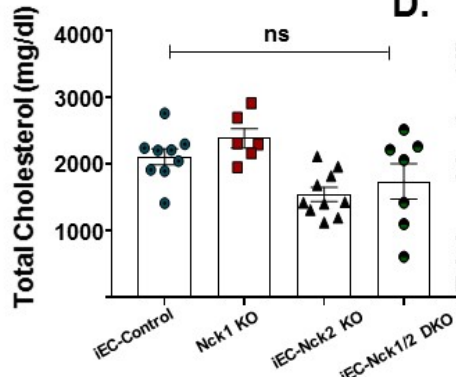**D.**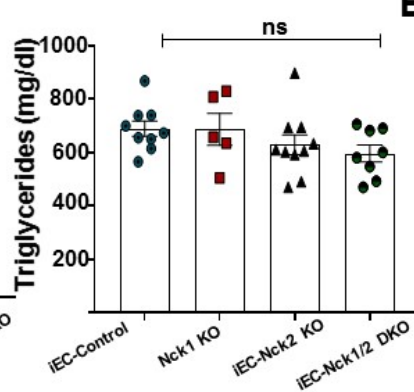**E.**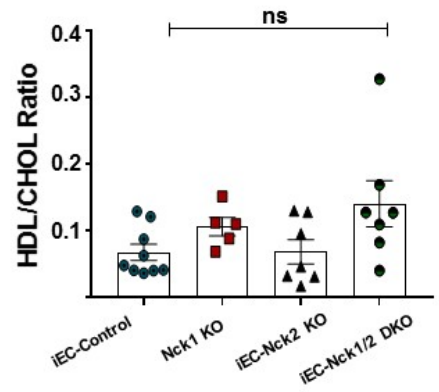

**Supplemental Figure 6. A)** Body weight changes in response to HFD feeding in iEC-Controls, Nck1 KO, iEC-Nck2 KO, iEC-DKO mice. Body weight in grams were recorded weekly for 12 weeks. **B)** Heart weight among experimental groups after 12 weeks of HFD feeding. **C)** Total plasma cholesterol (mg/dl) **D)** Triglycerides and **E)** HDL/total Cholesterol ratio were measured. Data are mean  $\pm$  SEM, n=5-10/group. Data analyzed by 1-Way ANOVA and Tukey's post-test, ns: not-significant.

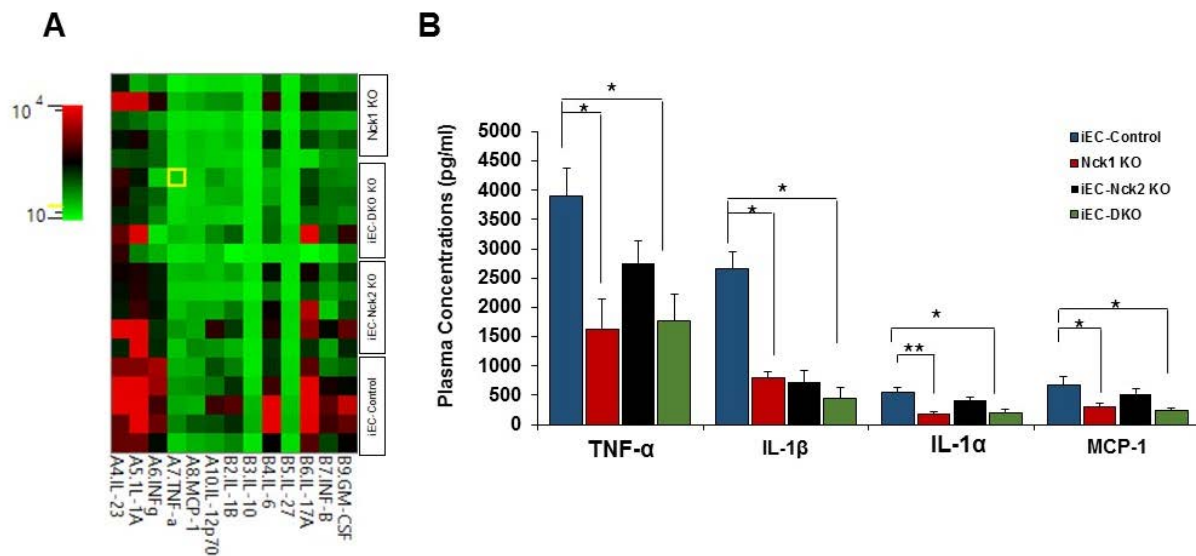

**Supplemental Figure 7. Nck1 KO mice show attenuated plasma pro-inflammatory cytokine/chemokine profiles. A)** Heat map and **(B)** a graphical representation of plasma cytokine concentrations (pg/ml), analyzed using LEGENDplex™. Data are mean ± SEM, n=6-10/group. Data analyzed by 2-Way ANOVA and Tukey's post-test, \*p<0.05, \*\*p<0.01.

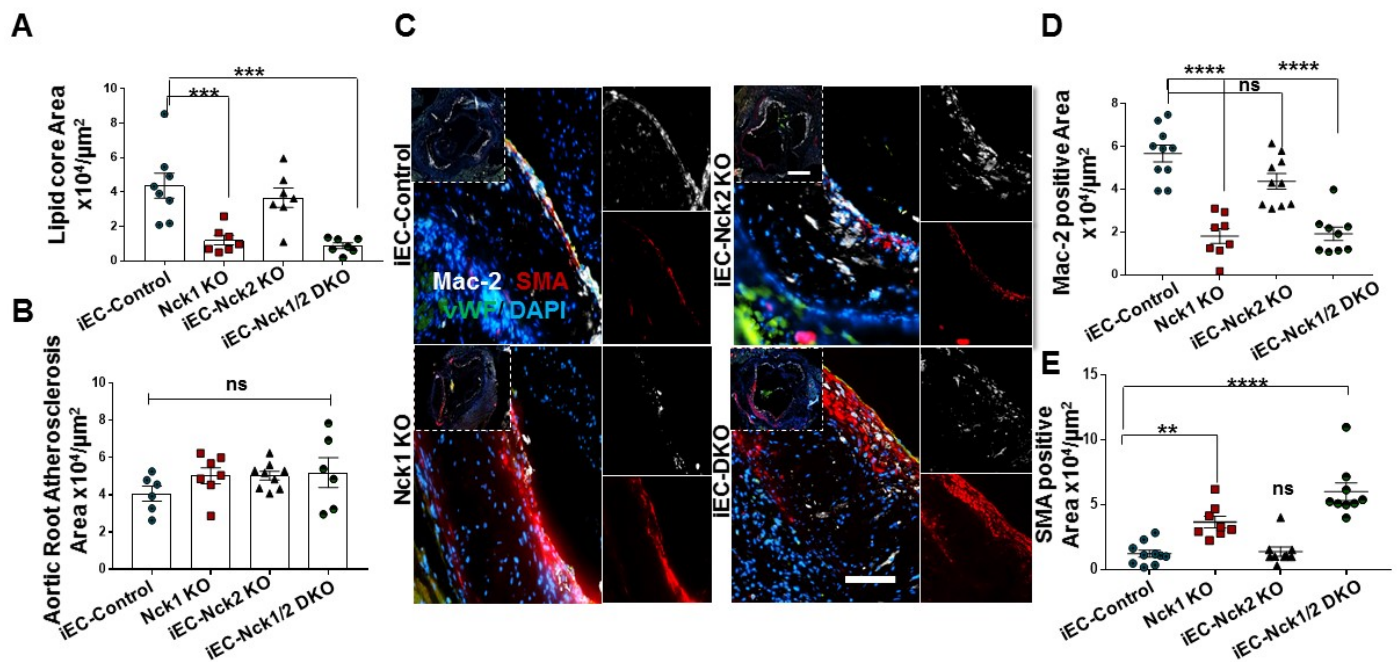

**Supplemental Figure 8. A)** Lipid core area quantification in carotid atherosclerosis. **B)** Aortic Root atherosclerosis and **(C-E)** analysis of aortic root plaque cellular content following staining for macrophages (Mac-2; white), smooth muscle cells ( $\alpha$ -smooth muscle actin; SMA, red) and endothelium (vWF; green). Analysis was performed using NIS Elements software and data are mean  $\pm$  SEM, n=6-10/group. Data analyzed by 1-Way ANOVA and Tukey's post-test, \*\*p<0.01, \*\*\*p<0.001, \*\*\*\*p<0.0001. Scale bars=50-200 $\mu$ m, ns=not significant.

**A**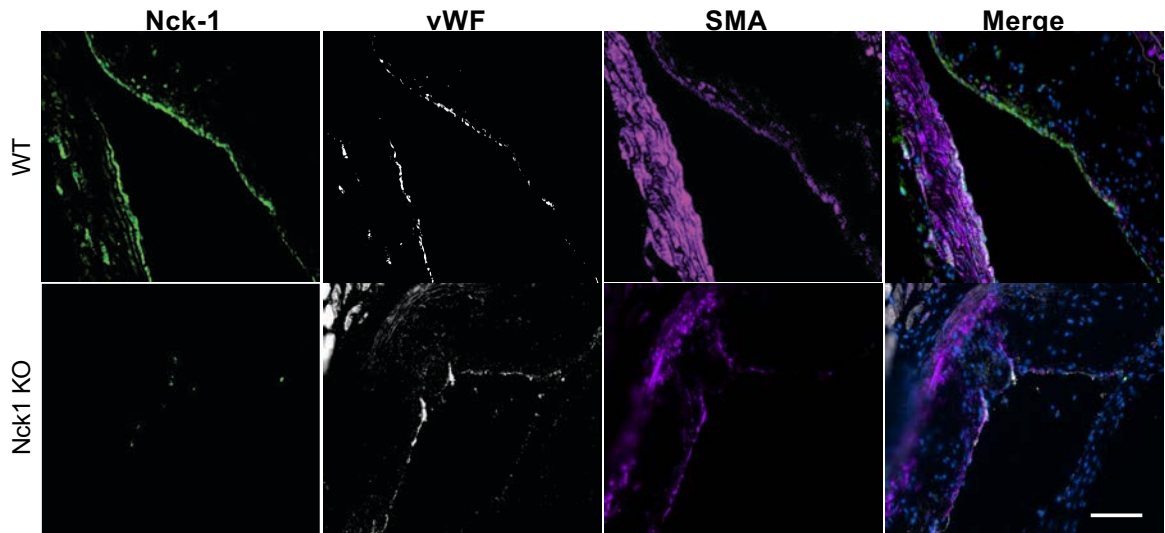**B**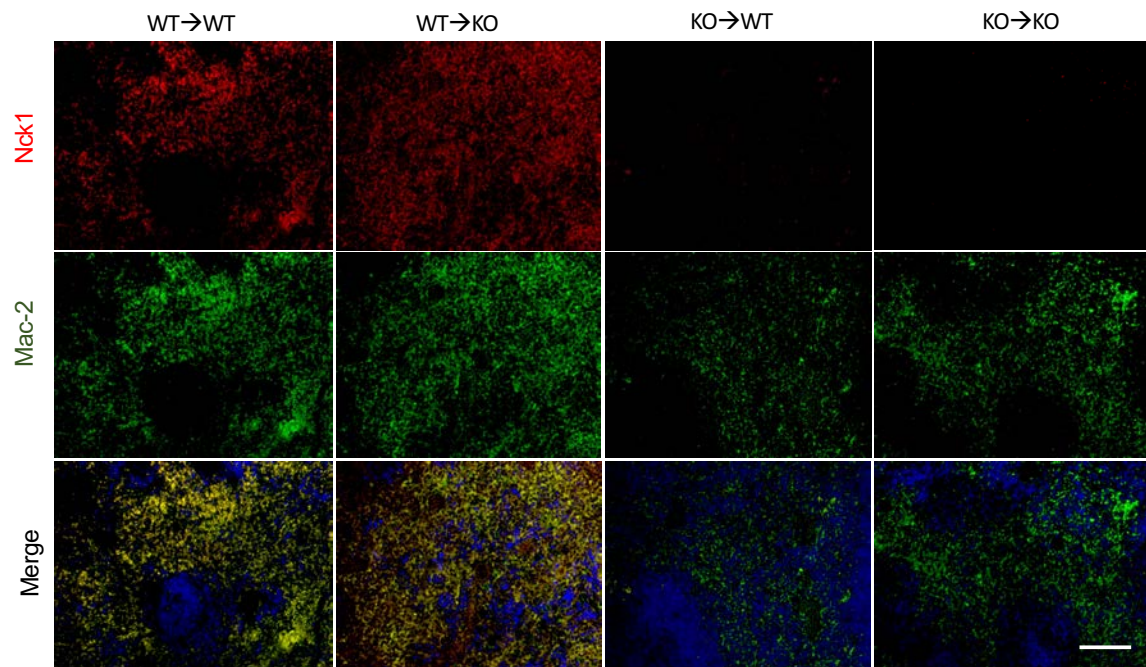

**Supplemental Figure 9. A) Testing staining specificity for Nck1 antibody (R7D Systems) in sections of mouse aortic atherosclerosis from wild type (WT) or Nck1 KO mice stained for Nck1, vWF, SMA. B) Splenic sections from bone marrow chimeric mice stained for Nck1 (red) and mac-2 (green). From n=5/ group. Scale bars=100µm.**

**A**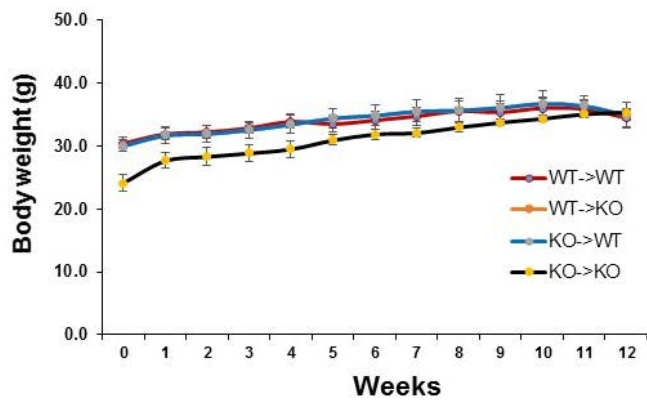**B**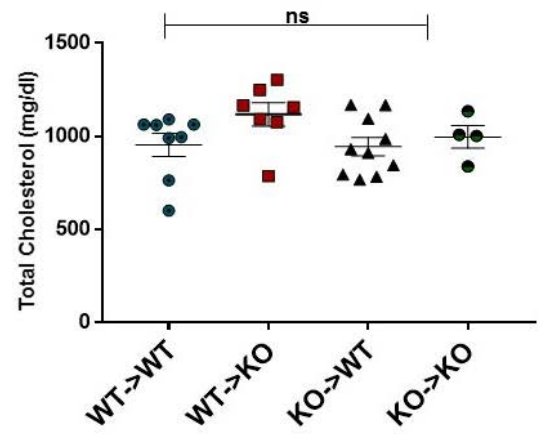

**Supplemental Figure 10.** Bone marrow chimera were produced as described in methods. **A)** Average body weight measurement assessed weekly for 12 weeks during the period of HFD feeding. **B)** Plasma cholesterol levels were assessed using an enzymatic assay. Data are mean  $\pm$  SEM, 2-Way ANOVA and Bonferroni's post-test was used, ns=not significant.

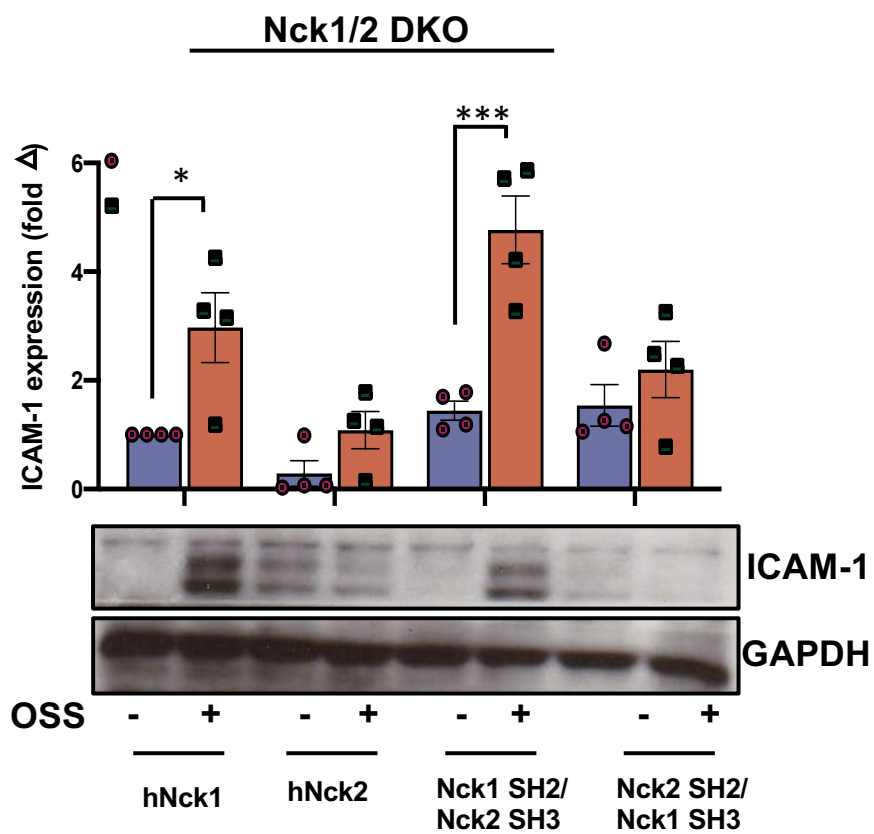

**Supplemental Figure 11.** ICAM-1 protein expression in Nck1/2 DKO HAECs after rescuing the expression of Nck1, Nck2, the Nck1 SH2/Nck2 SH3 chimera, or the Nck2 SH2/Nck1 SH3 chimera. Data are mean  $\pm$  SEM, n=4 independent experiment. Data are analyzed by 2-Way ANOVA and Bonferroni's post-test, \*p<0.05, \*\*\*p<0.001.

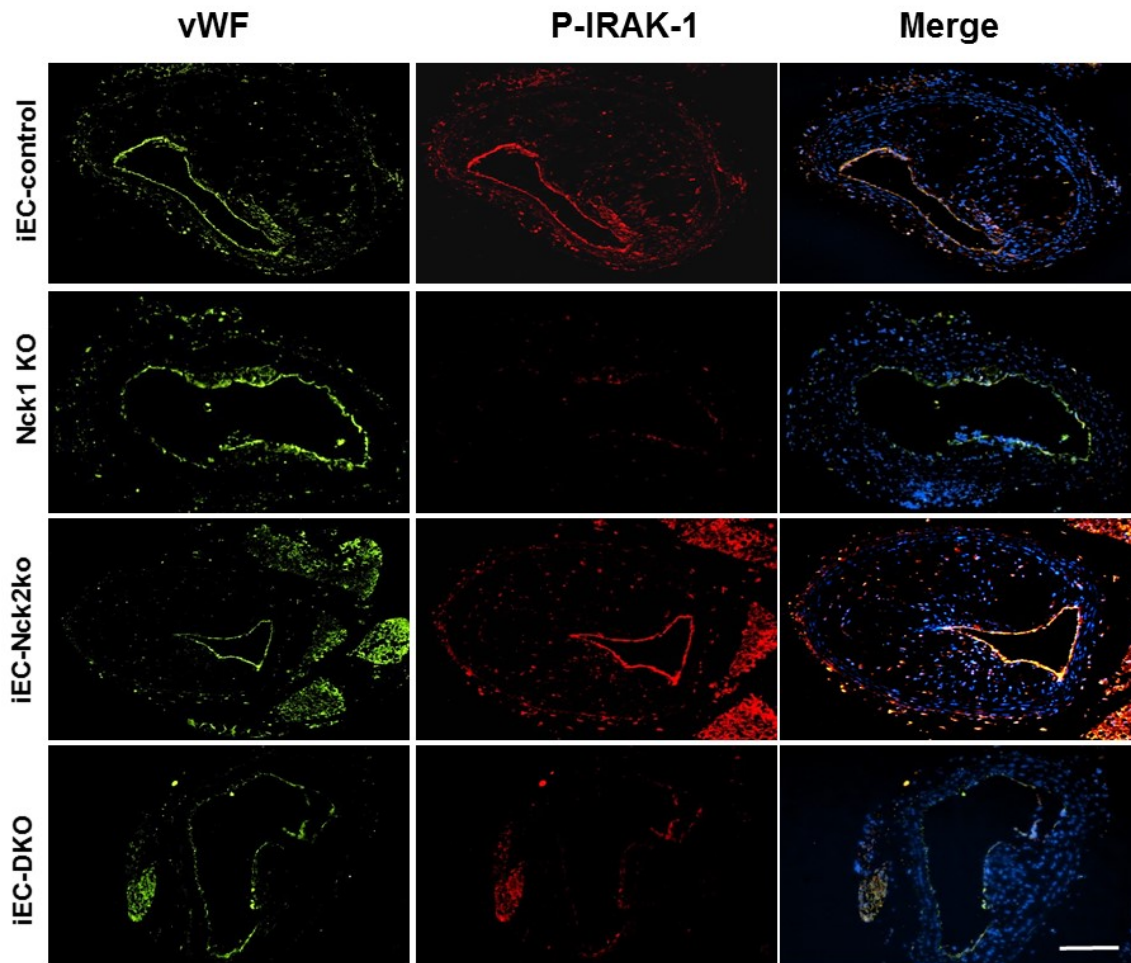

**Supplemental Figure 12.** Immunostained images from brachiocephalic arteries (BCA) after HFD feeding in iEC-Controls, Nck1 KO, iEC-Nck2 KO, iEC-DKO mice. Representative staining for endothelium (vWF; green), p-IRAK-1 (red). Analysis was performed using NIS Elements software and images are from n=4/group. Scale bar=100 $\mu$ m.

Figure 1.

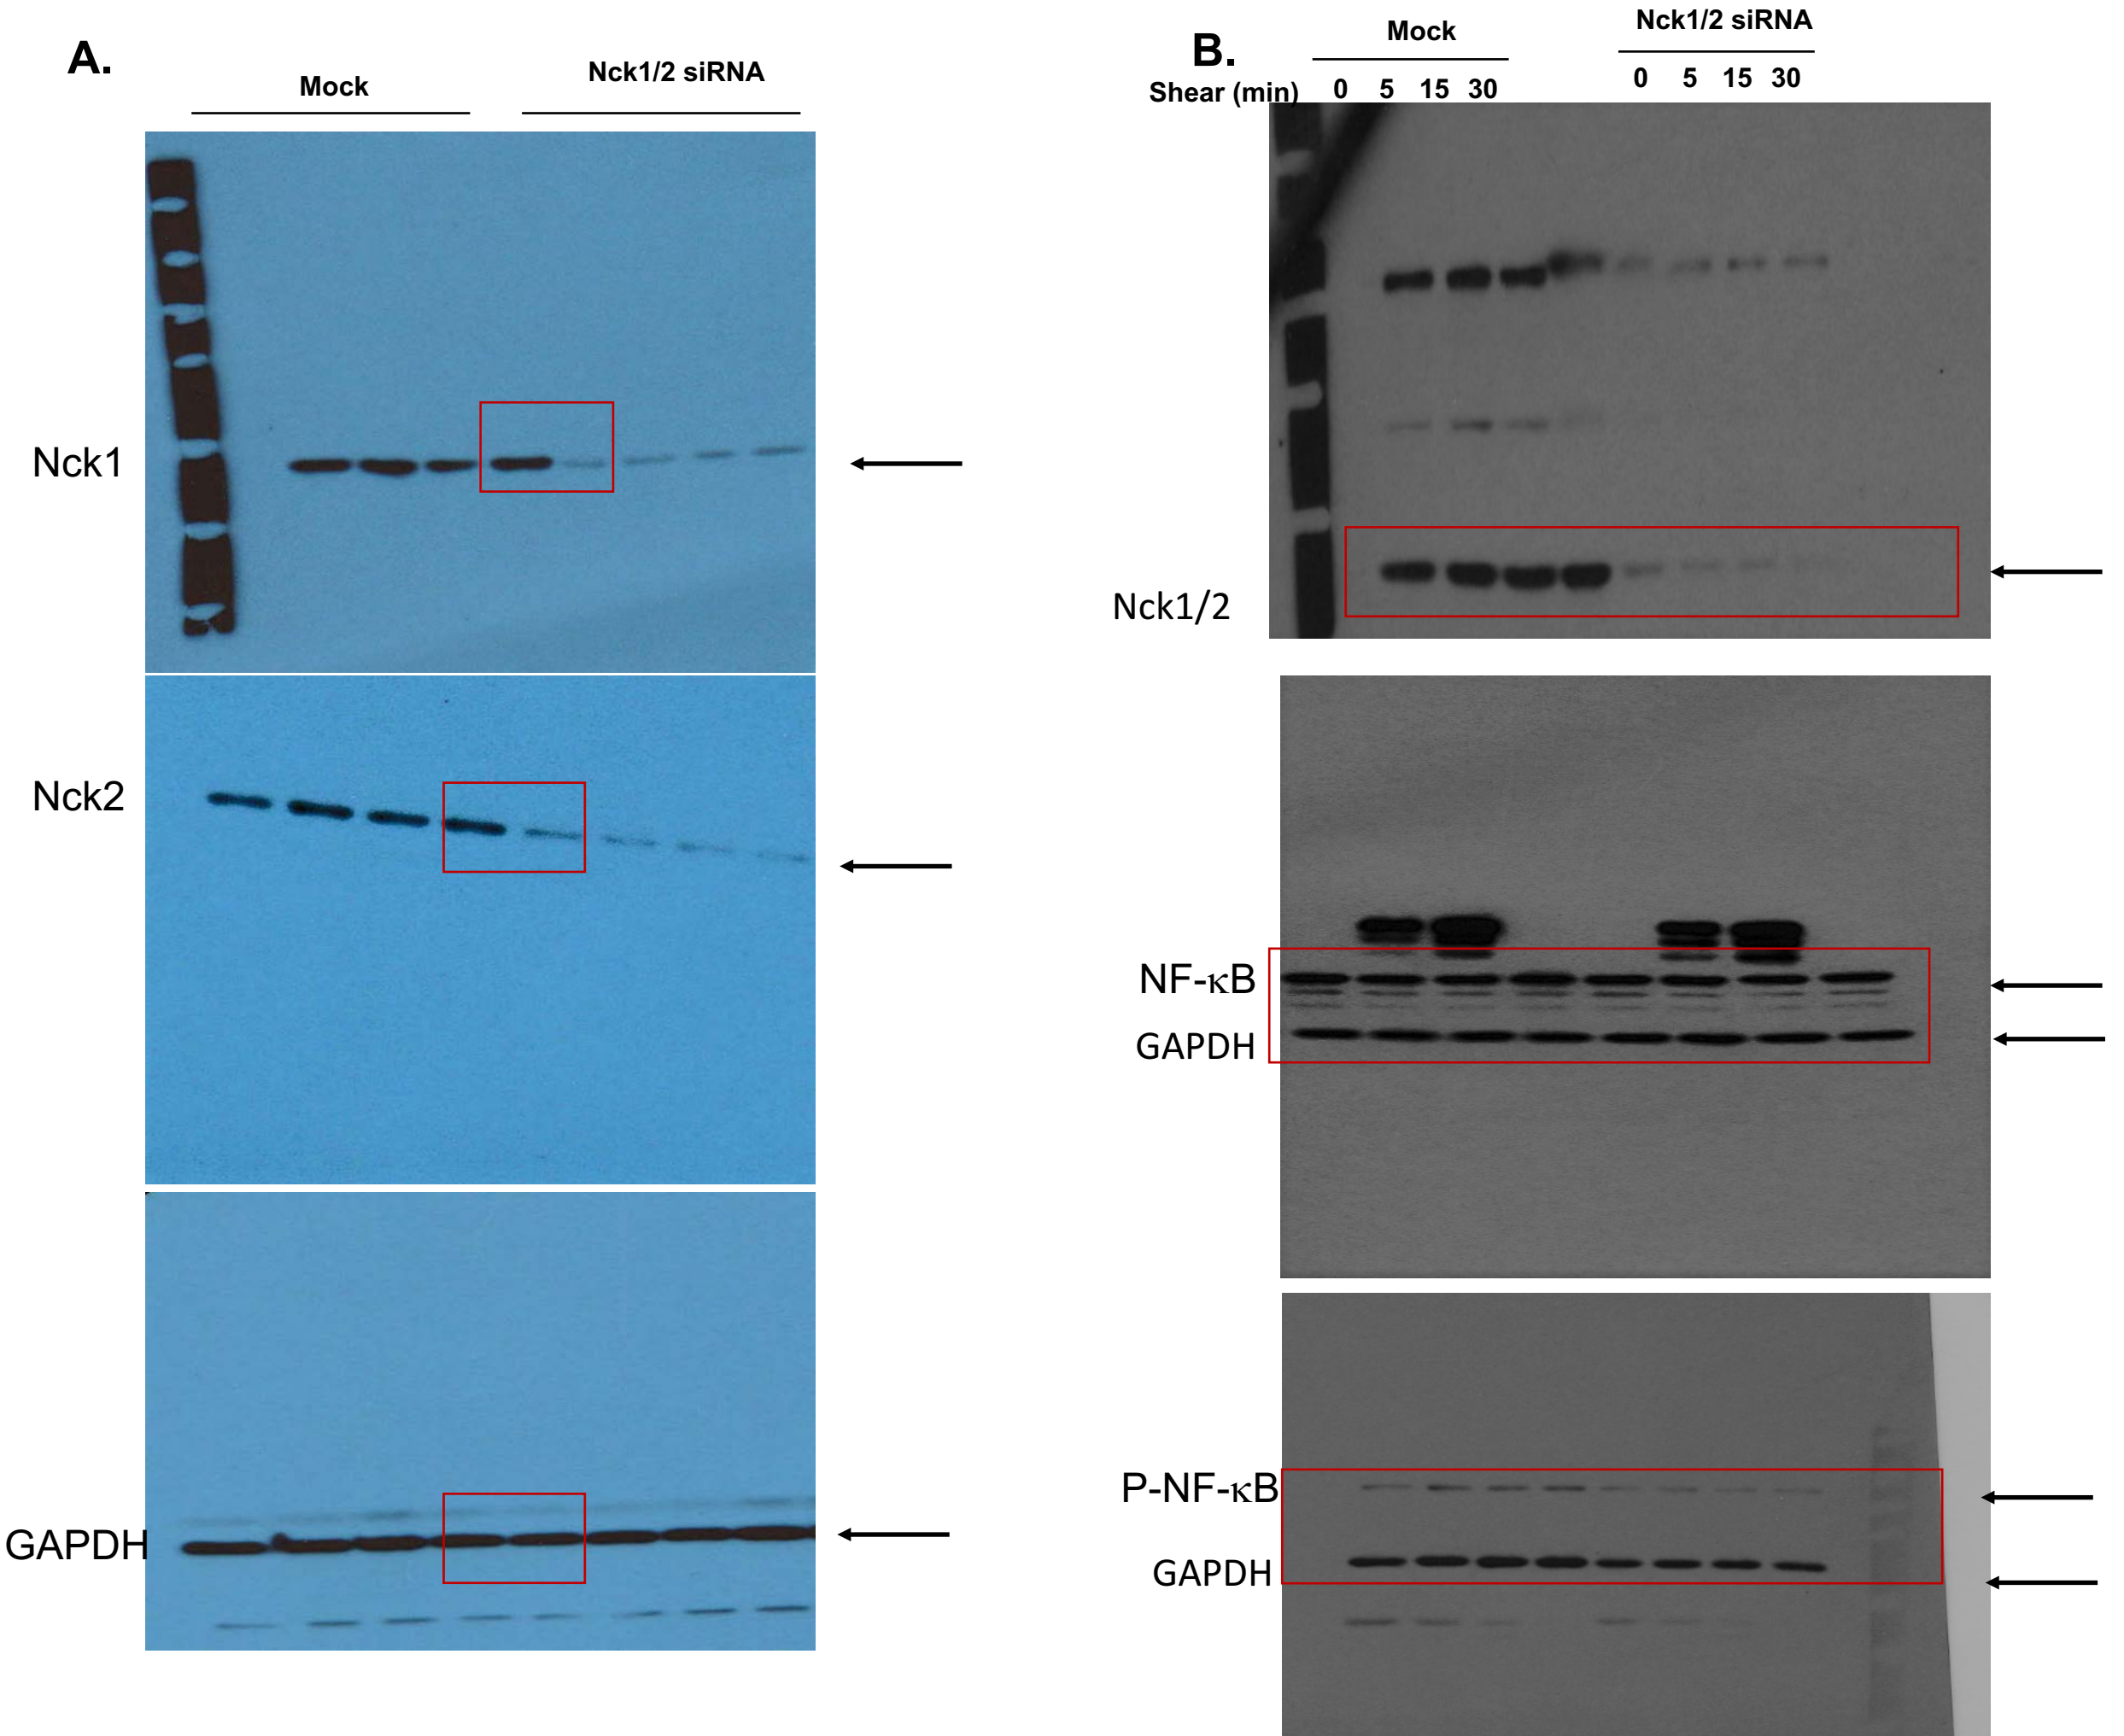



Figure 1.

F.

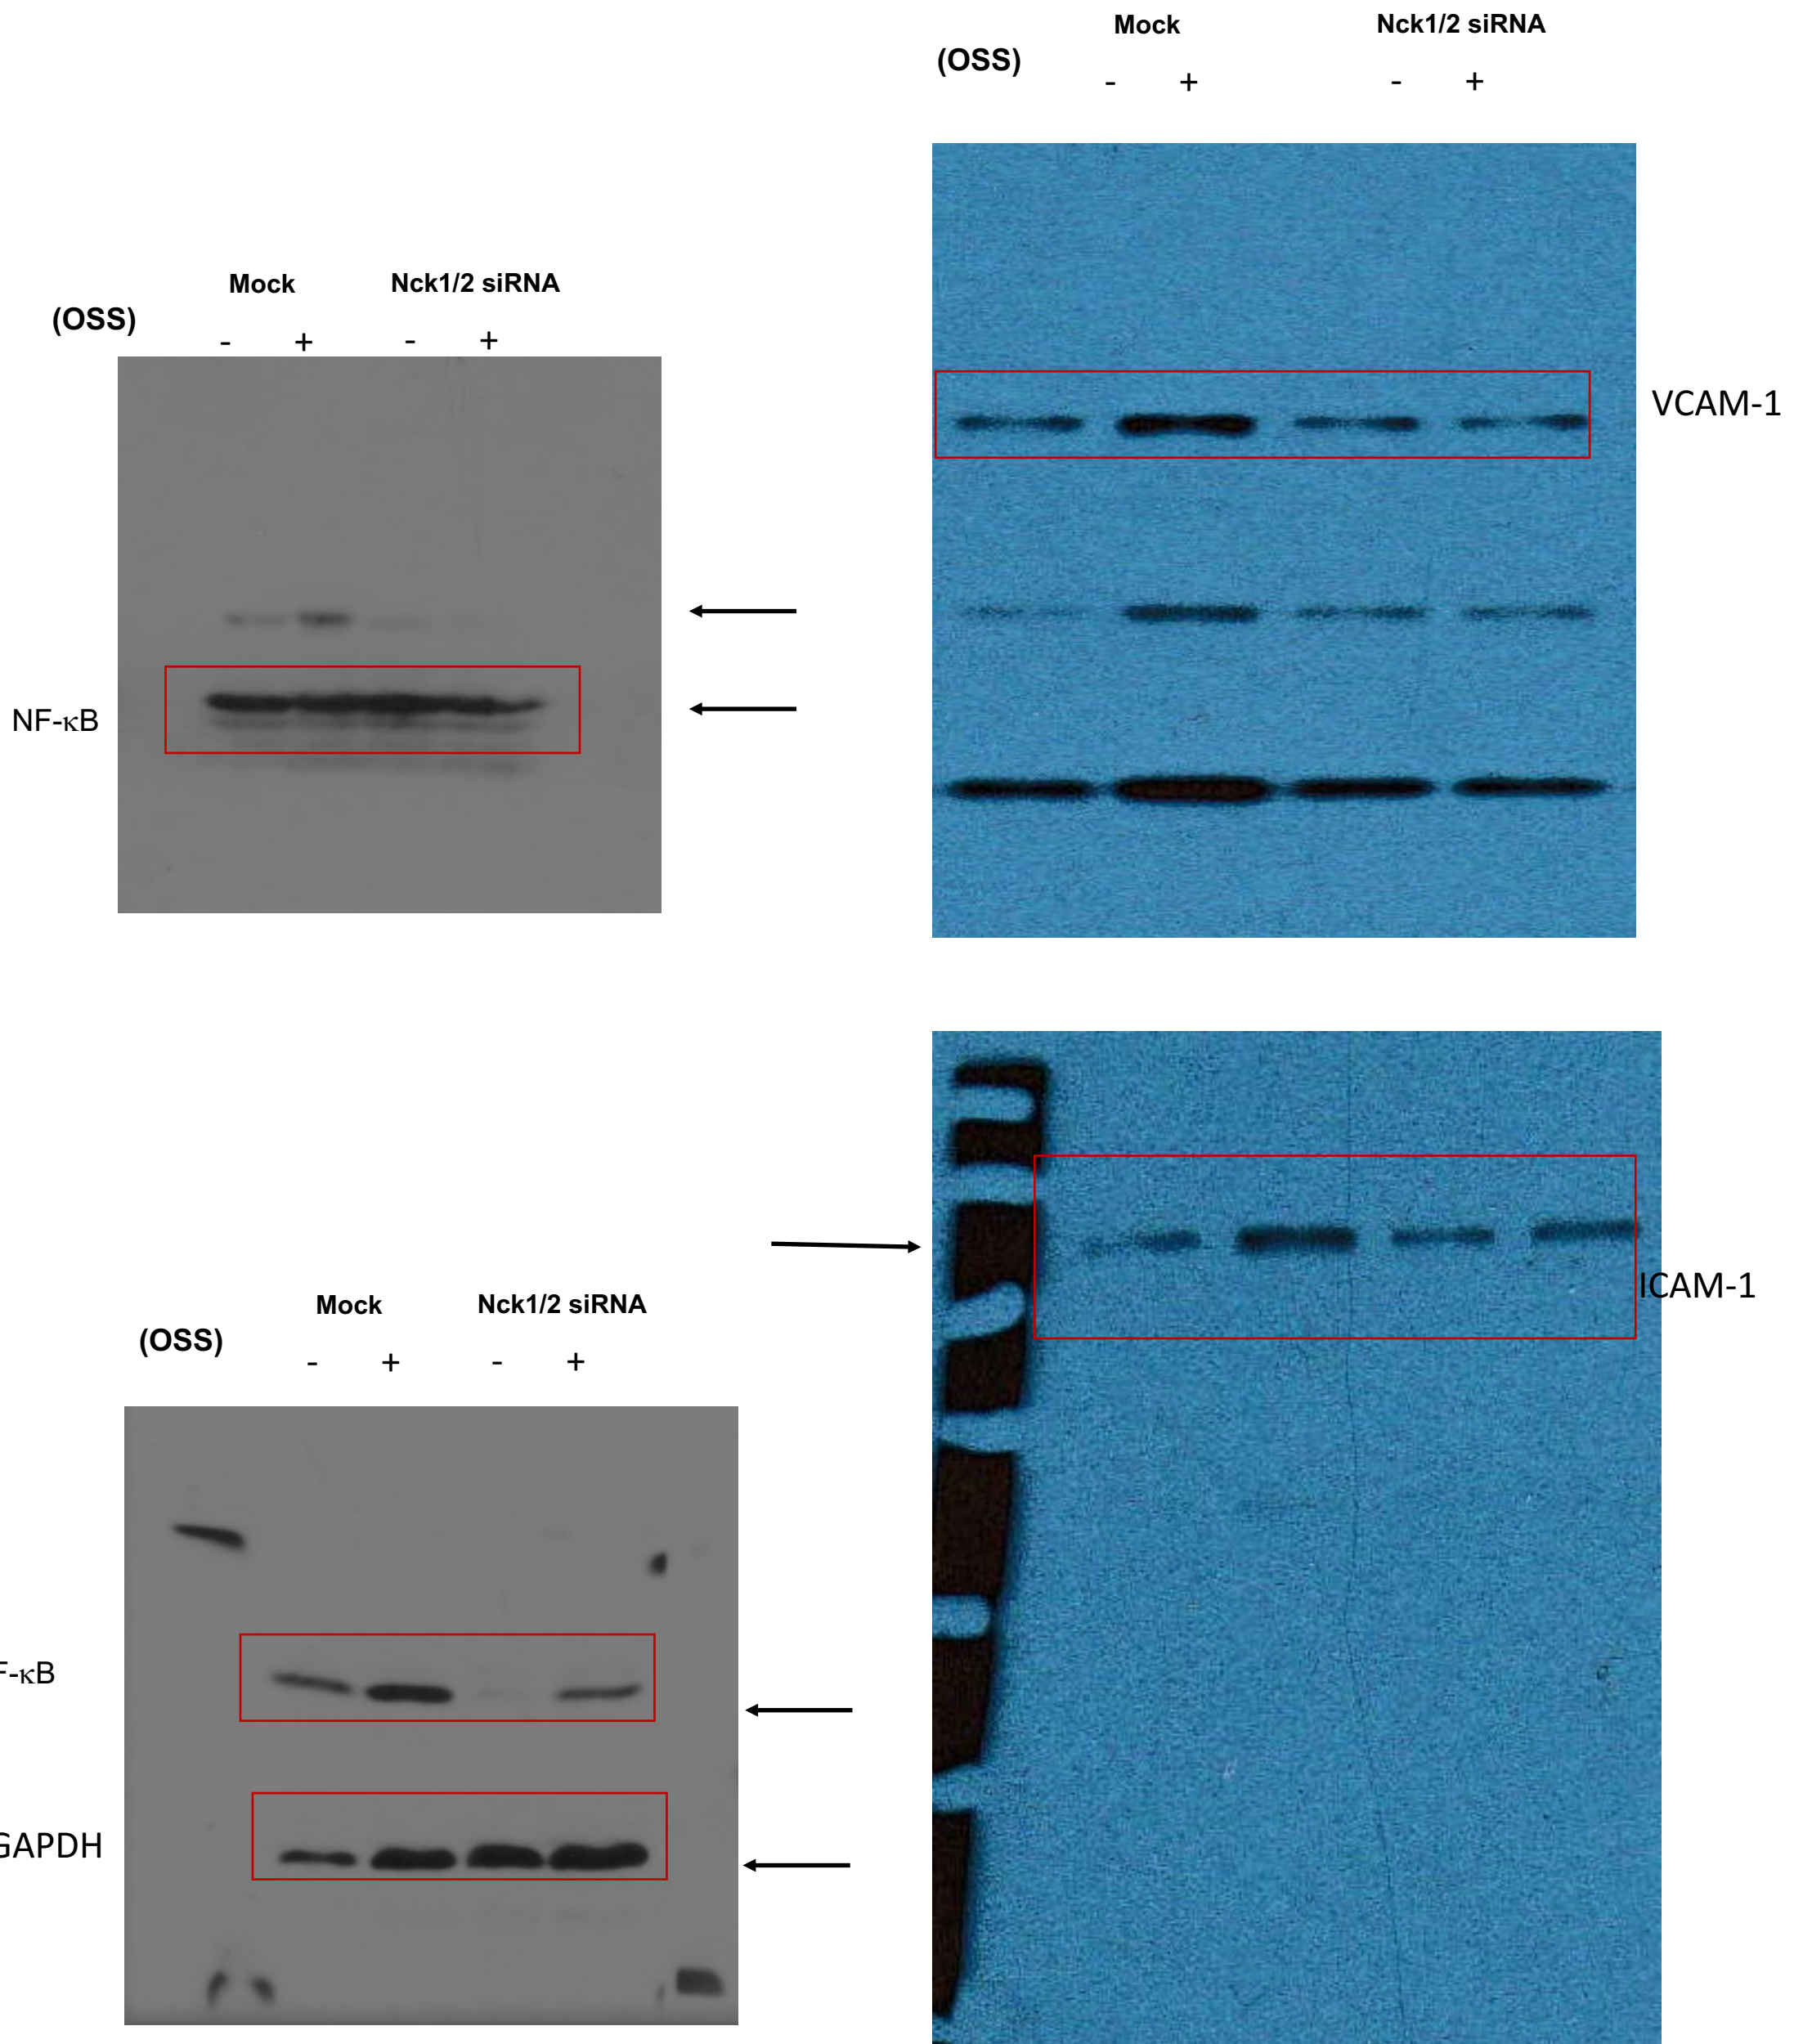

**Figure 2.**

**A.**

Mock      Nck1 siRNA      Nck2 siRNA

Nck-1

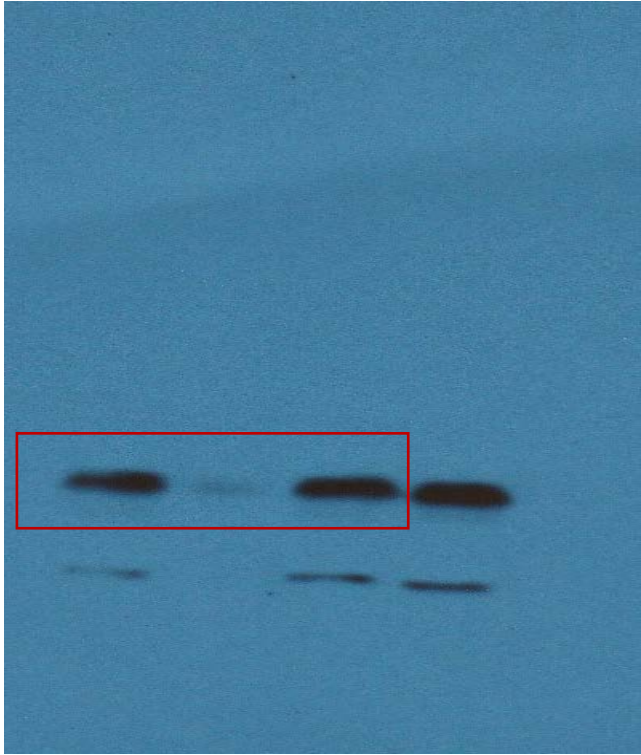

Nck2

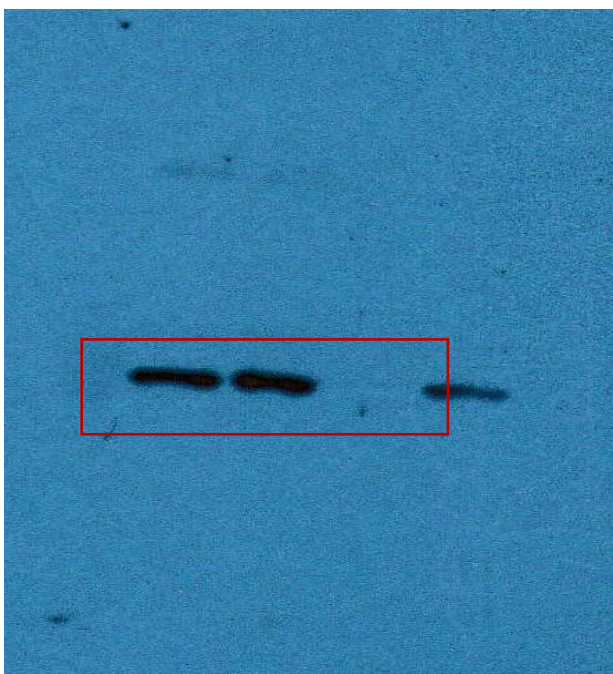

GAPDH

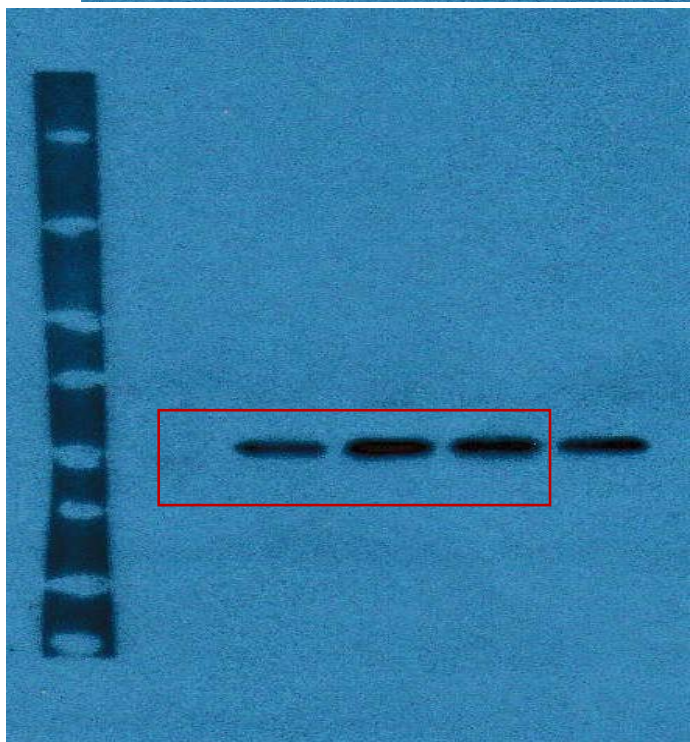

**B.**

Mock      Nck1 siRNA      Nck2 siRNA  
Shear (min)    0 5 15 30    0 5 15 30    0 5 15 30

Nck-1

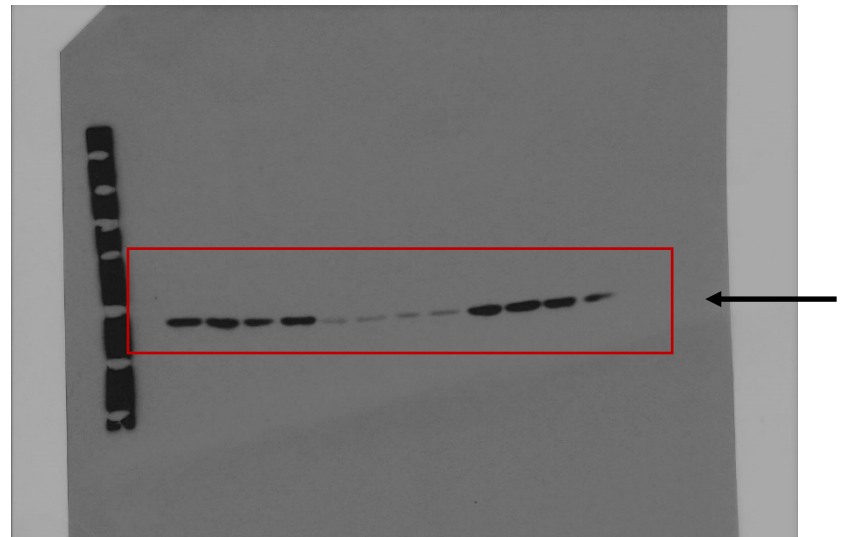

P-NF- $\kappa$ B  
GAPDH

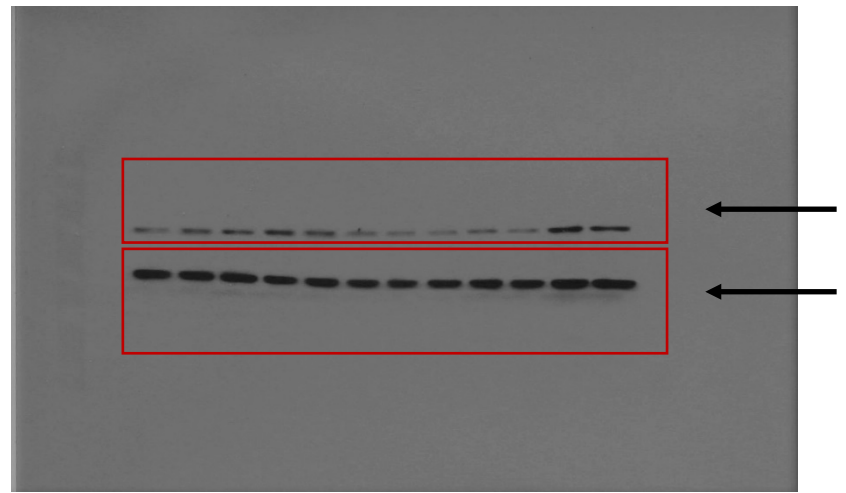

NF- $\kappa$ B

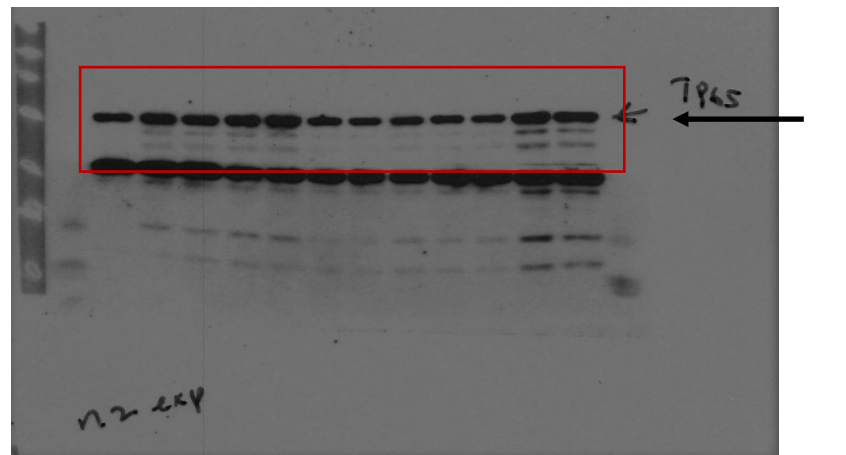

Nck2

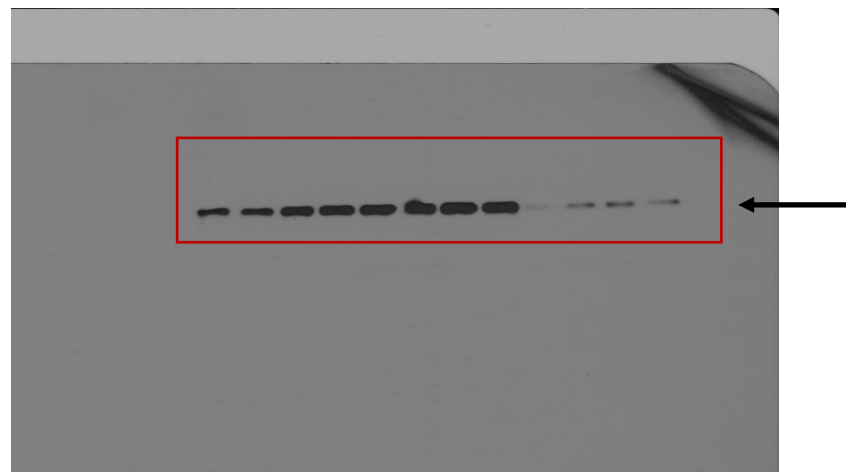

Figure 2F.

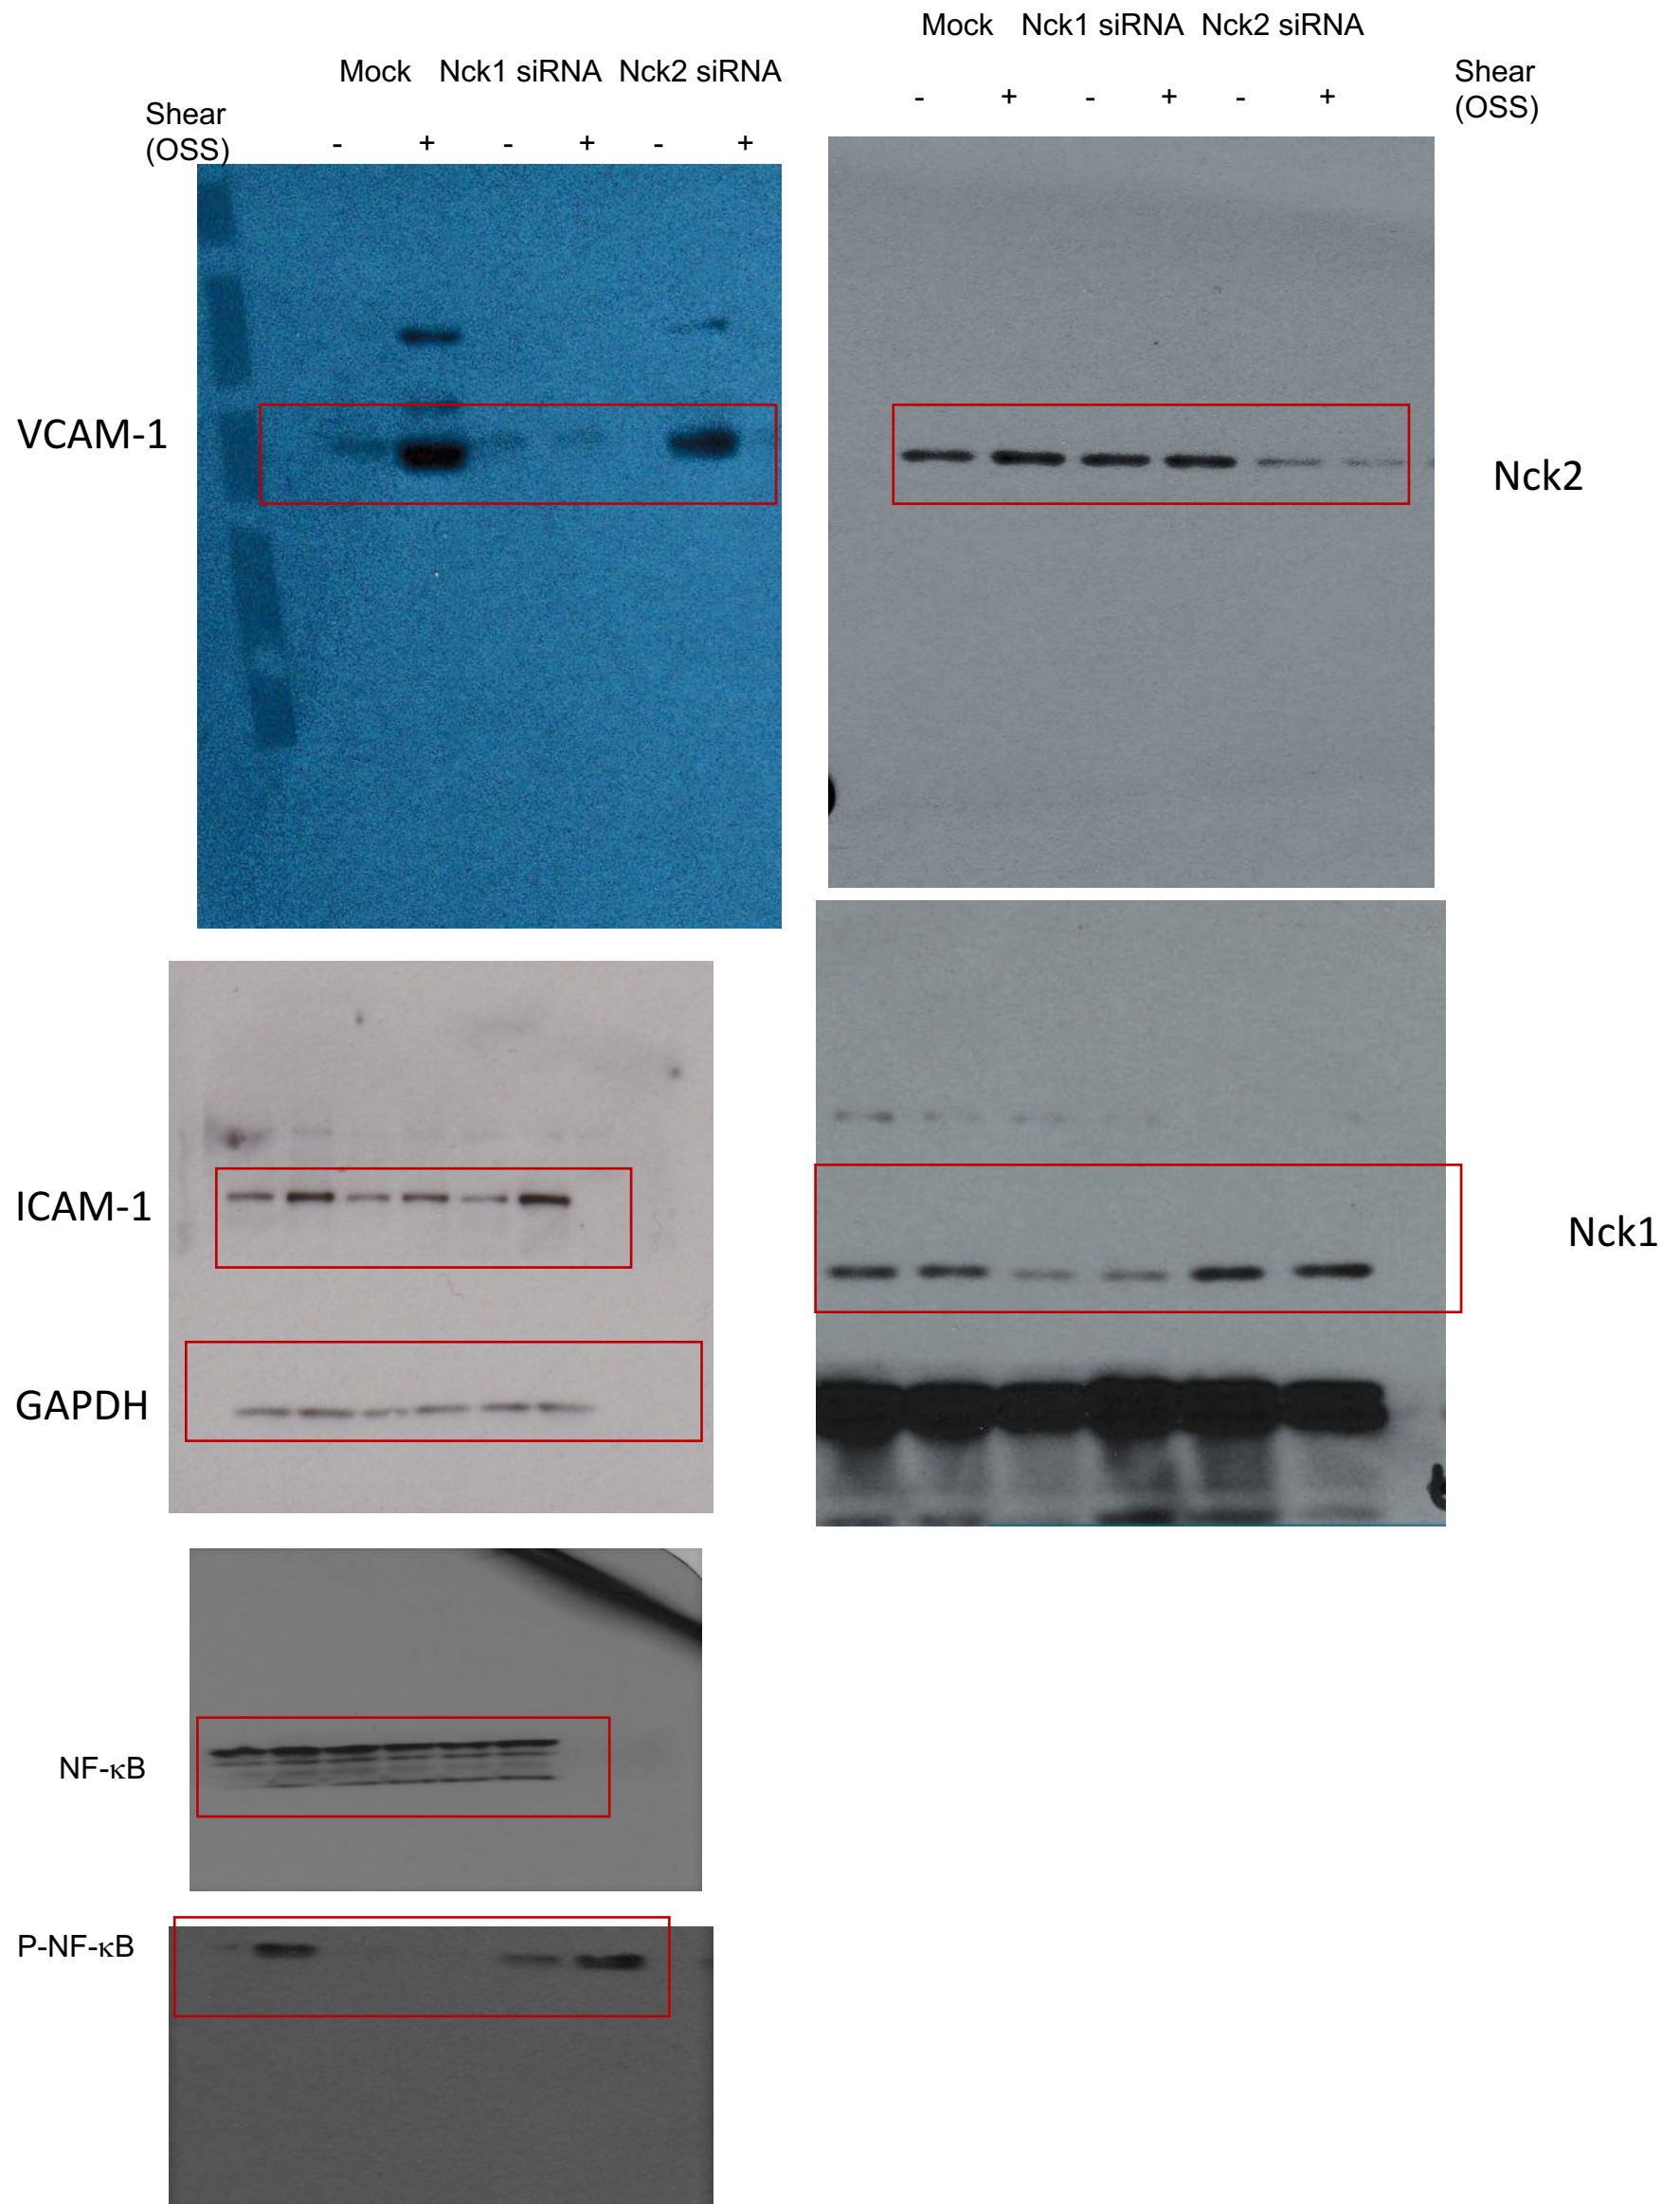

**Figure 7.**

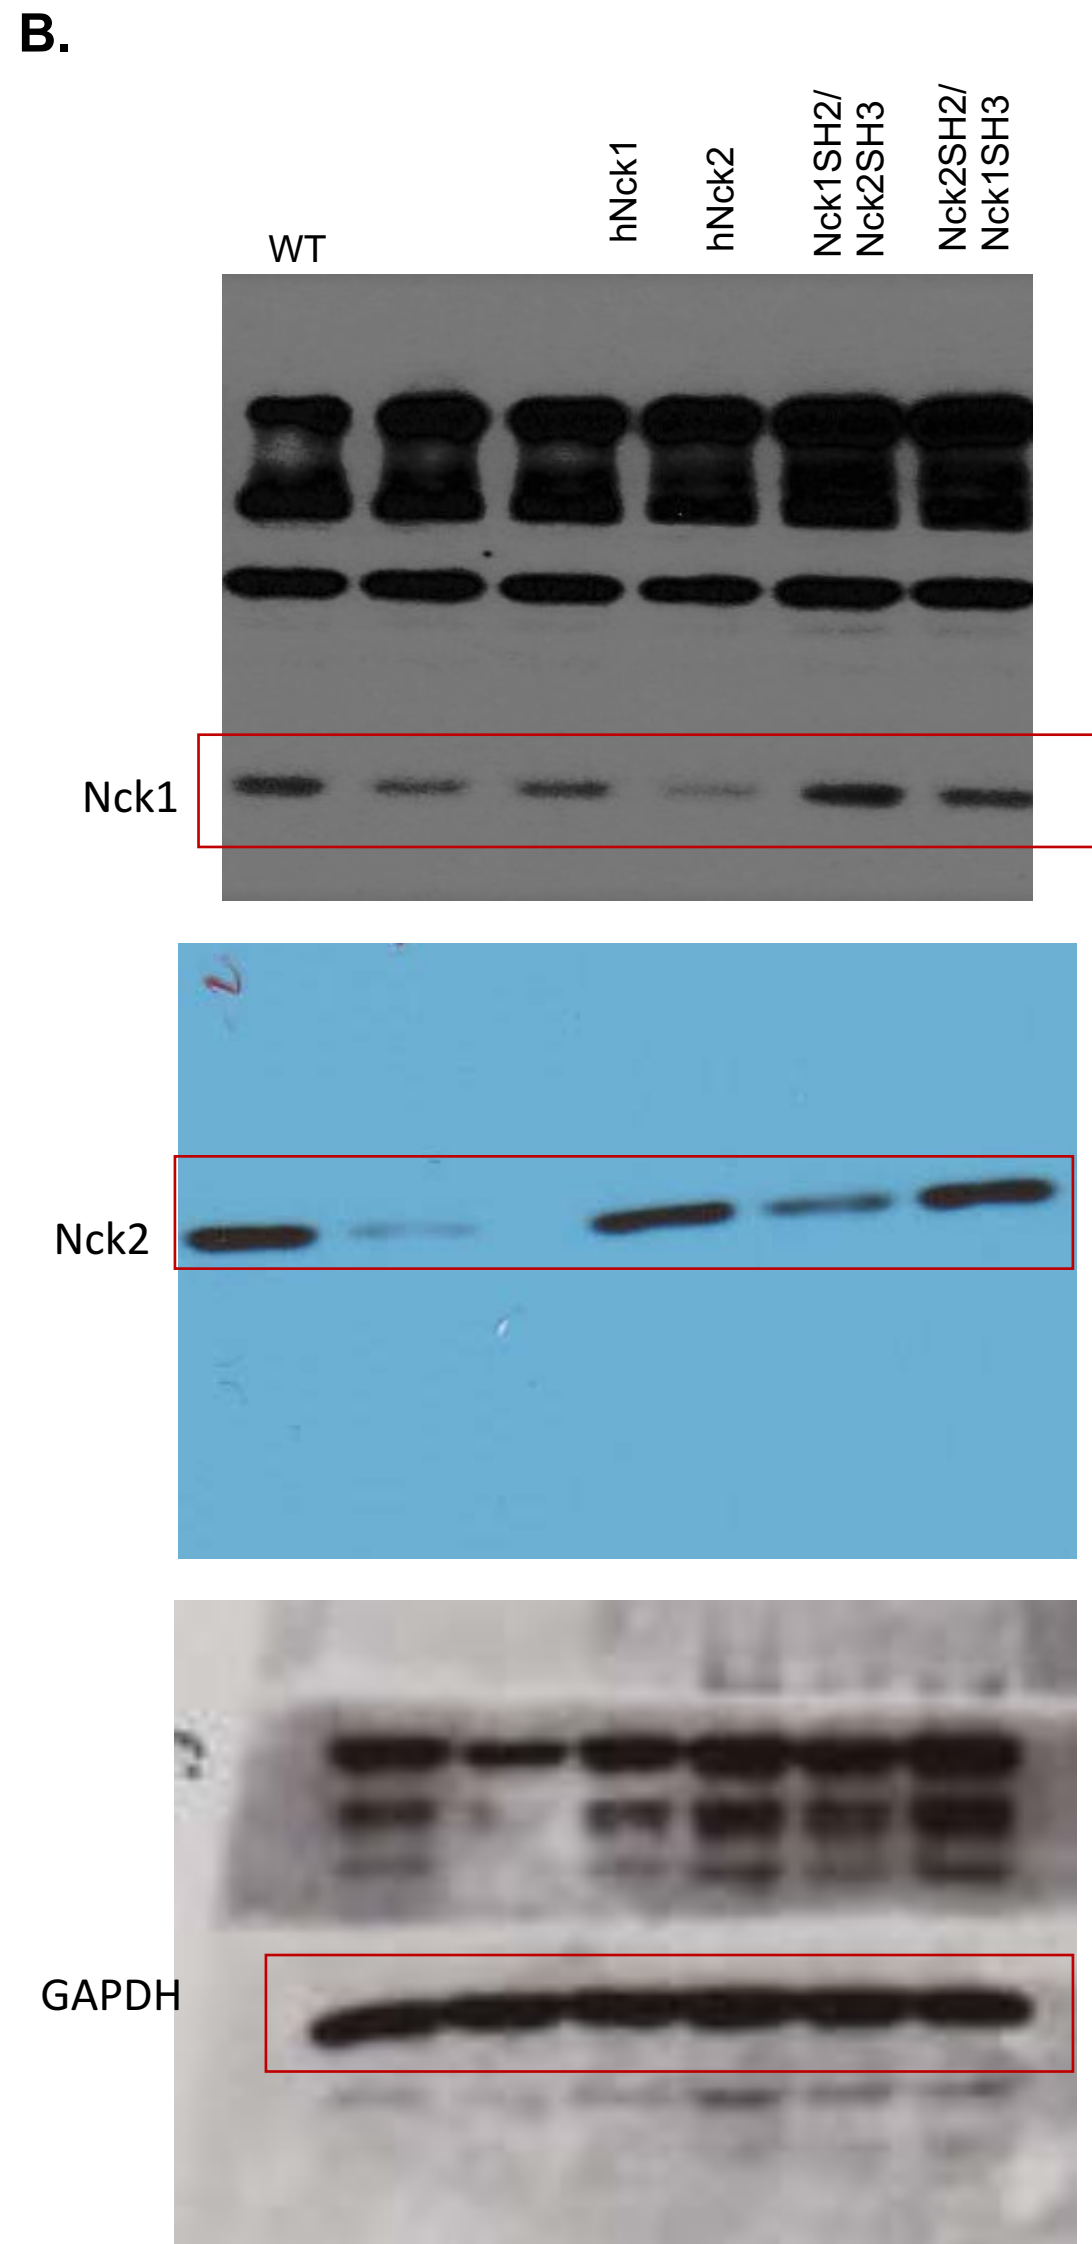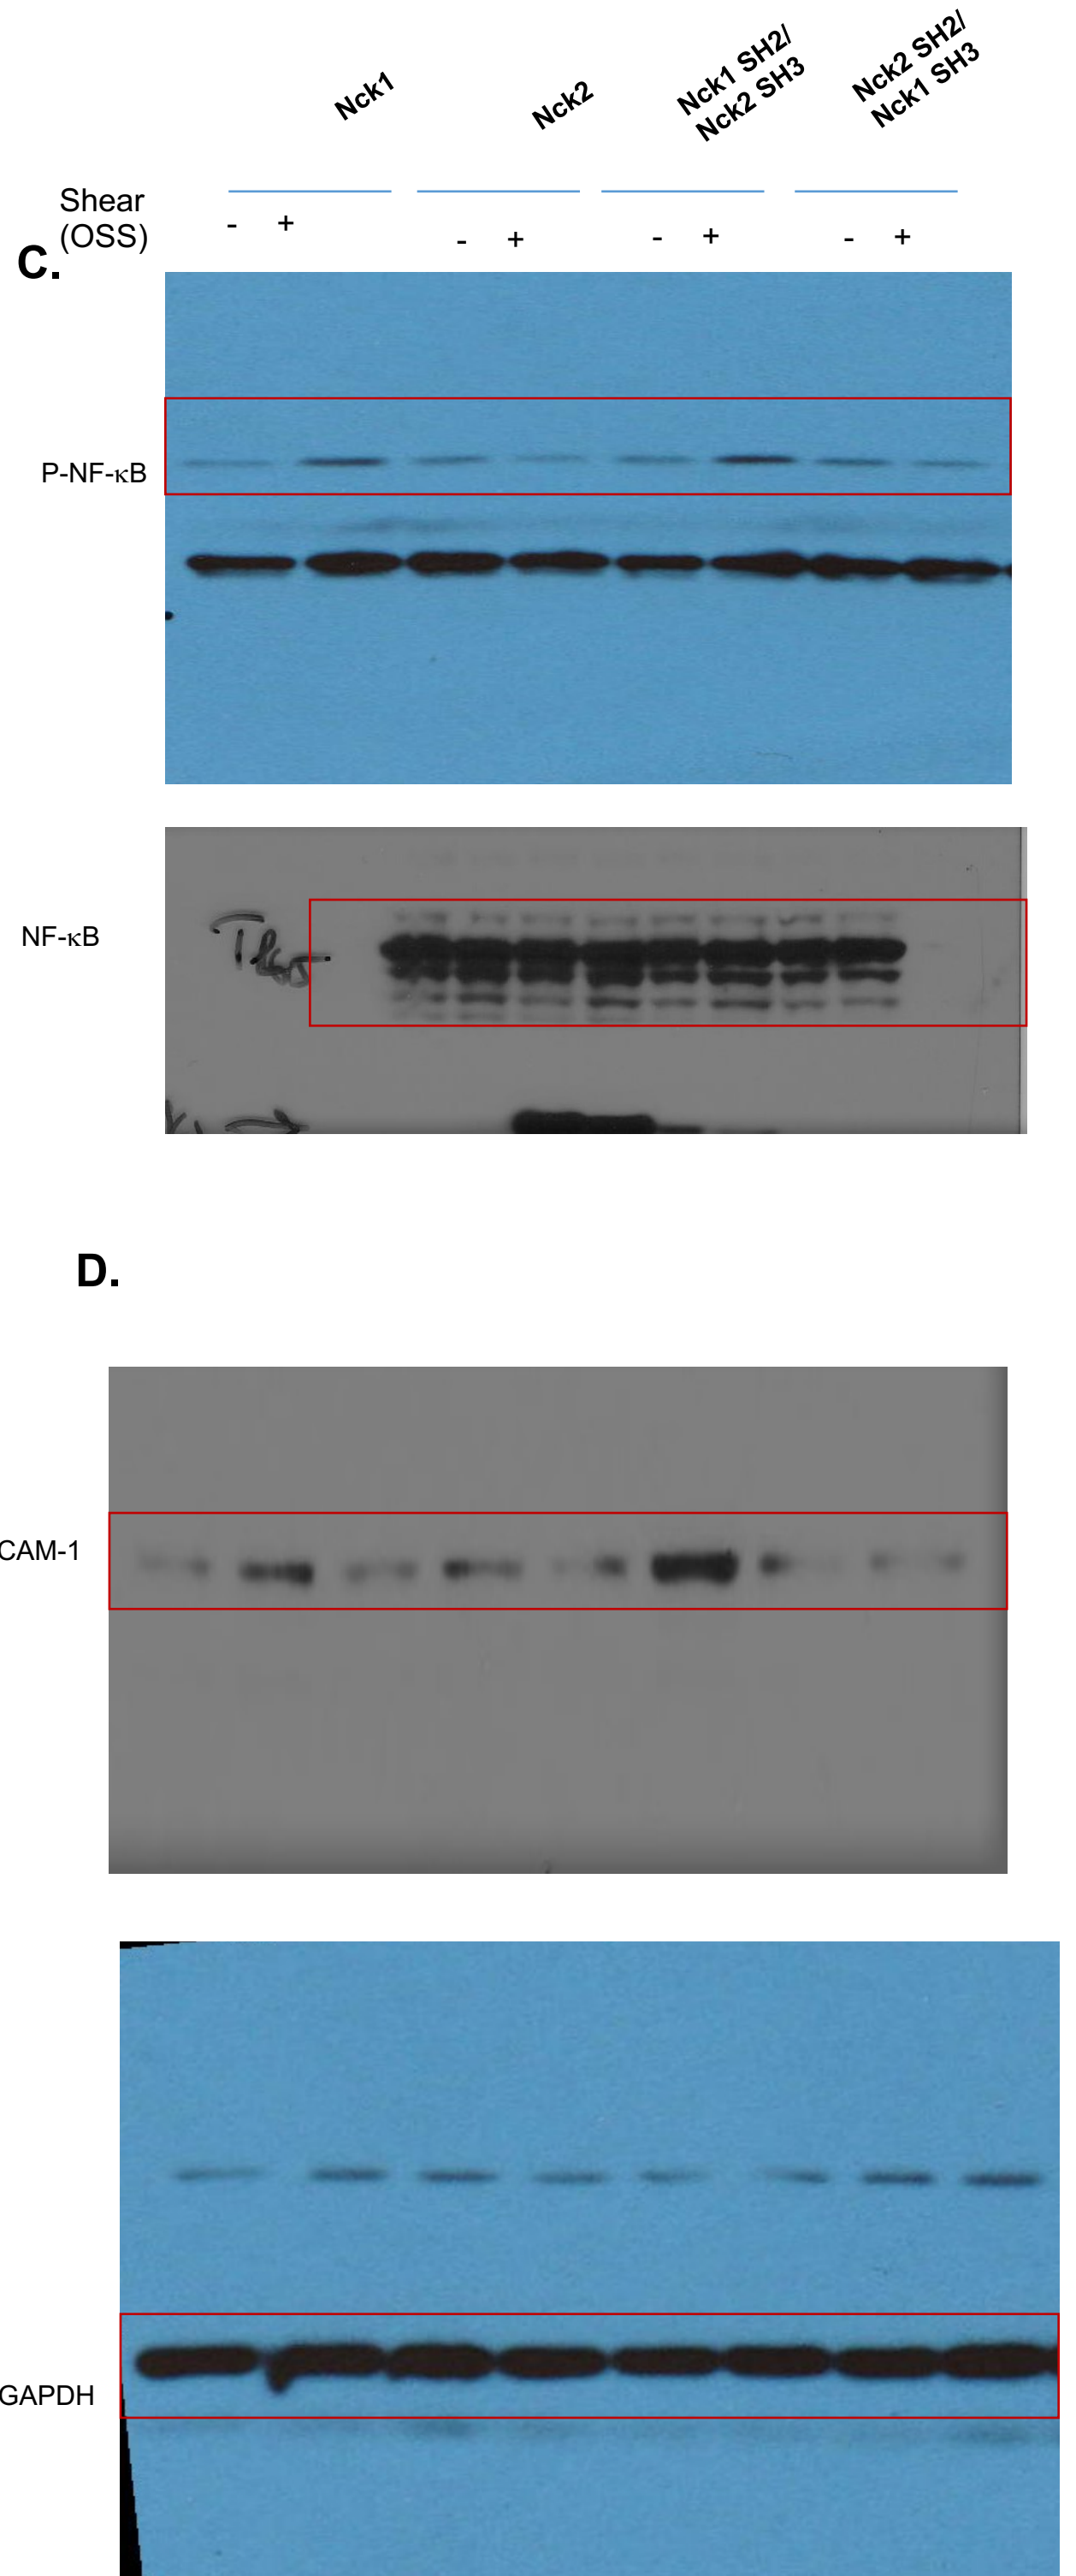

**Figure 7.**

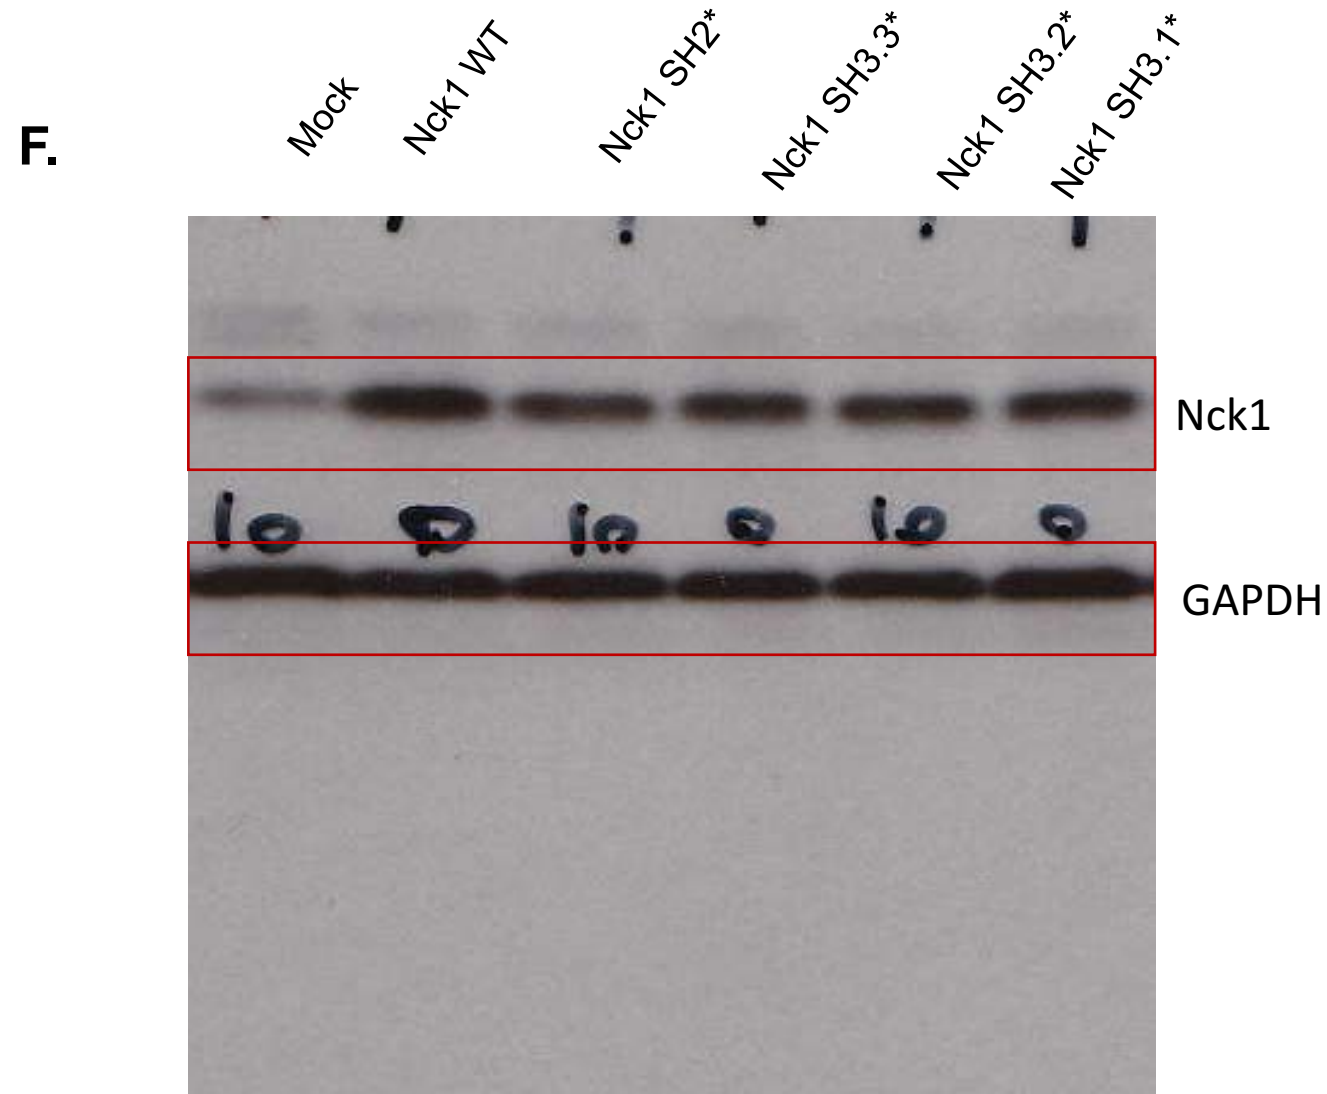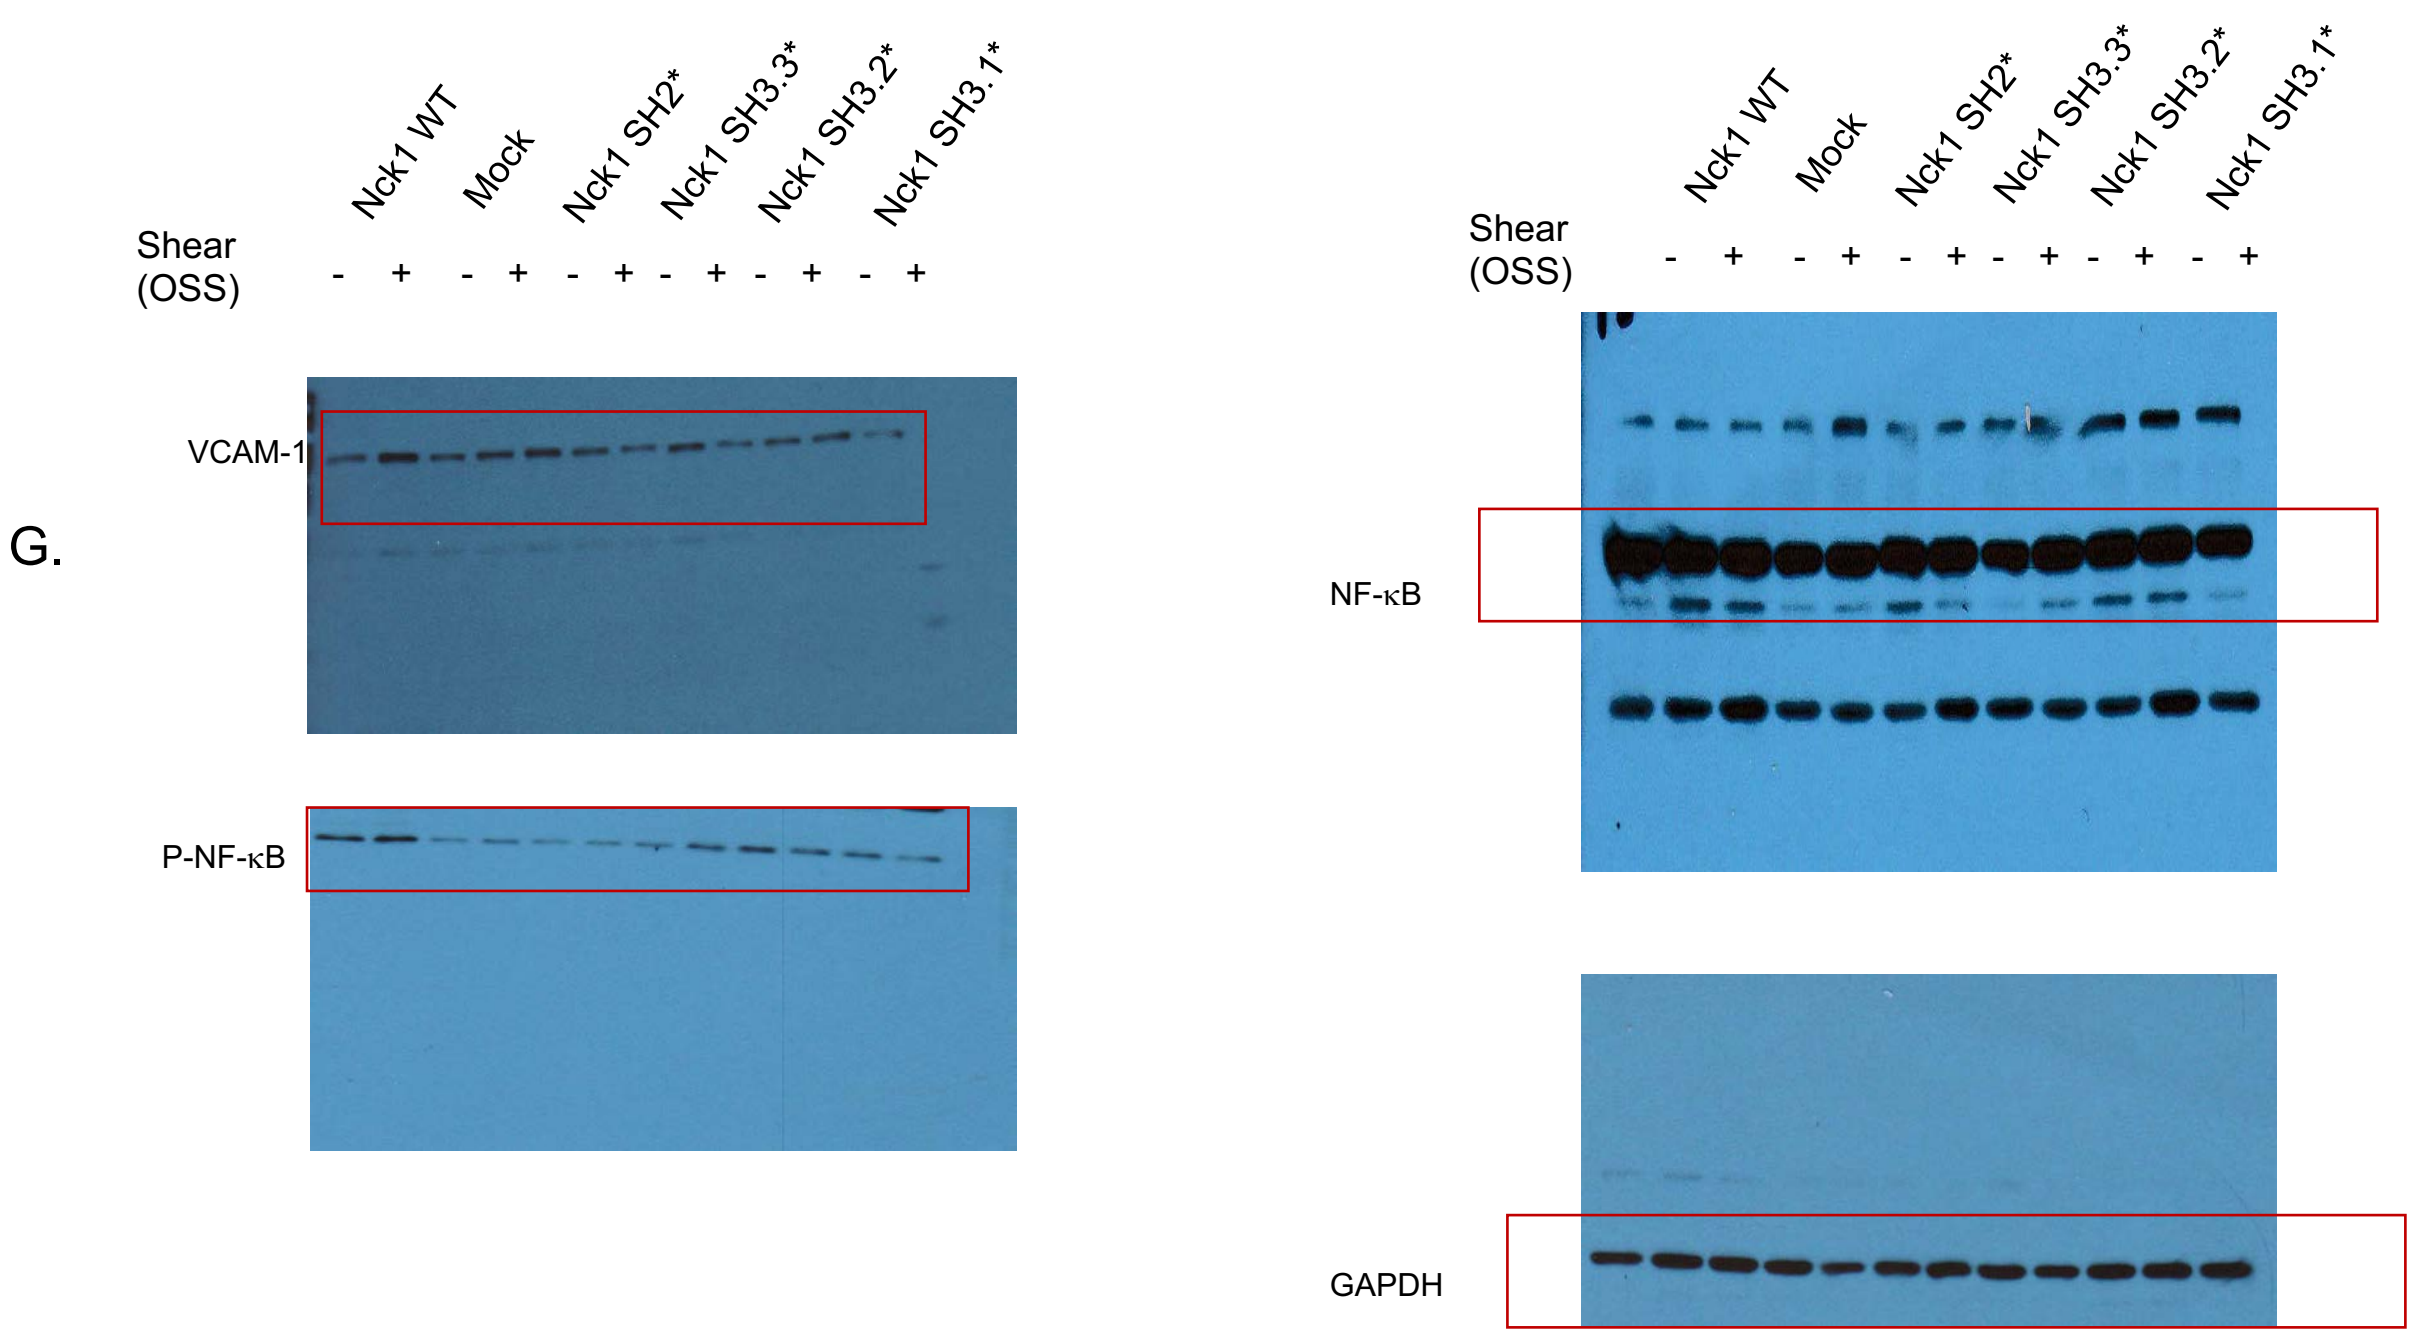

Figure 8.

A.

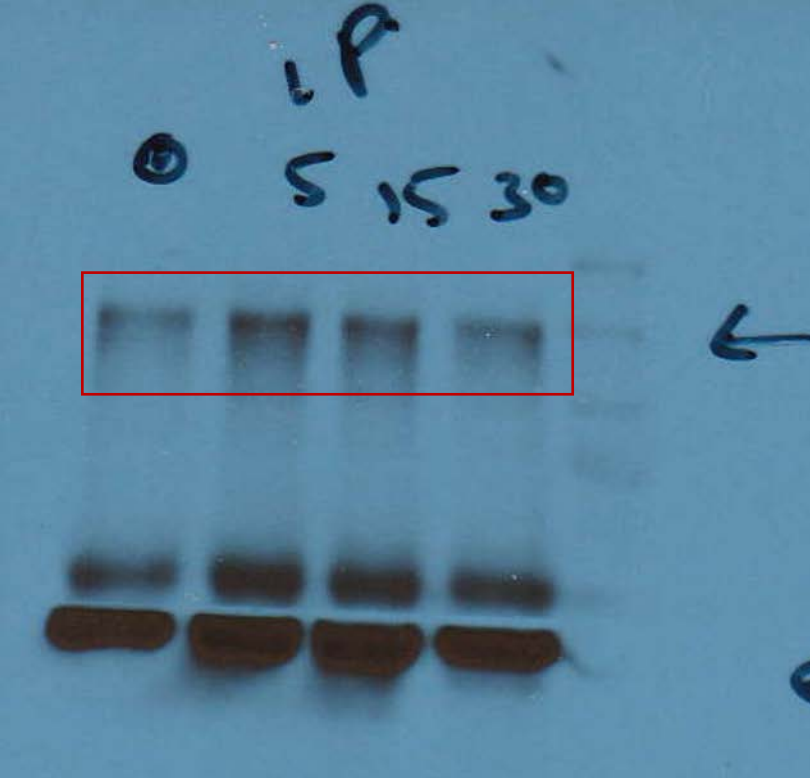

pIRAK-1

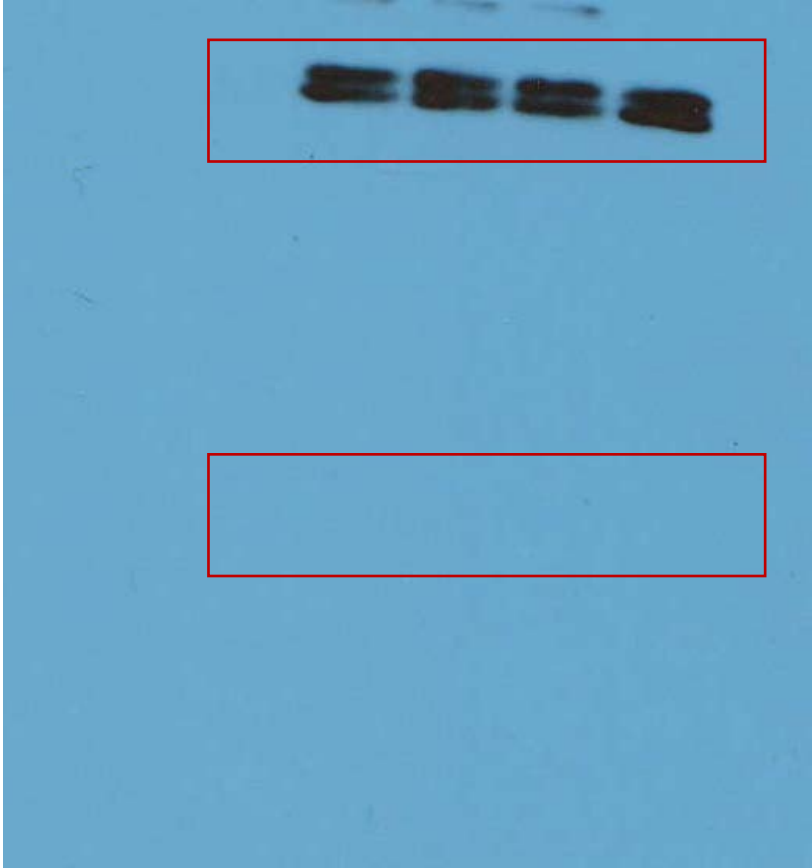

IRAK-1

Nck2

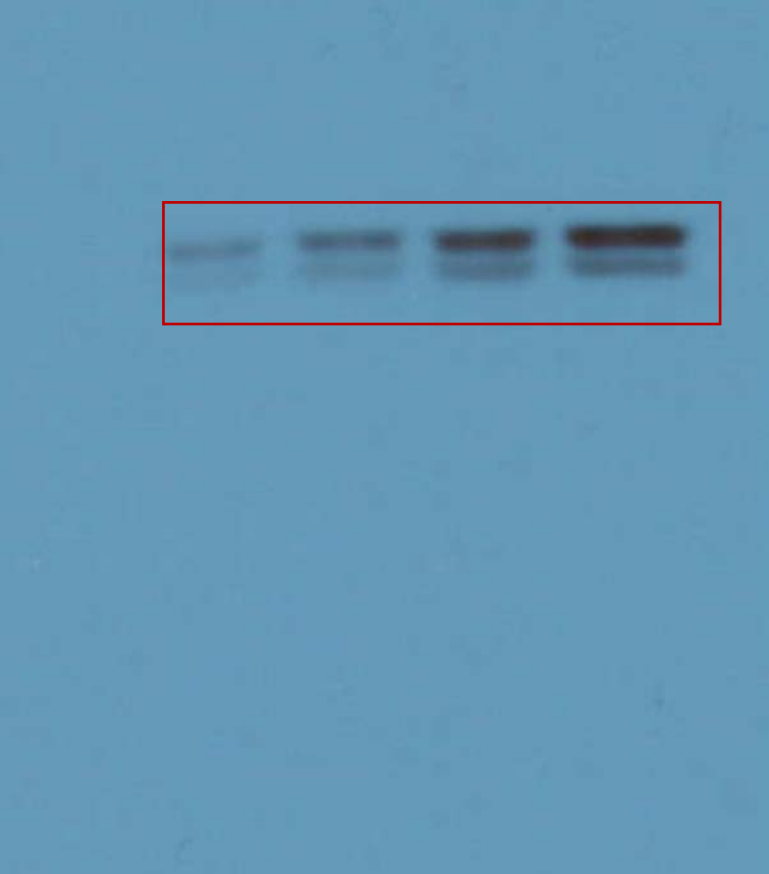

IRAK-1

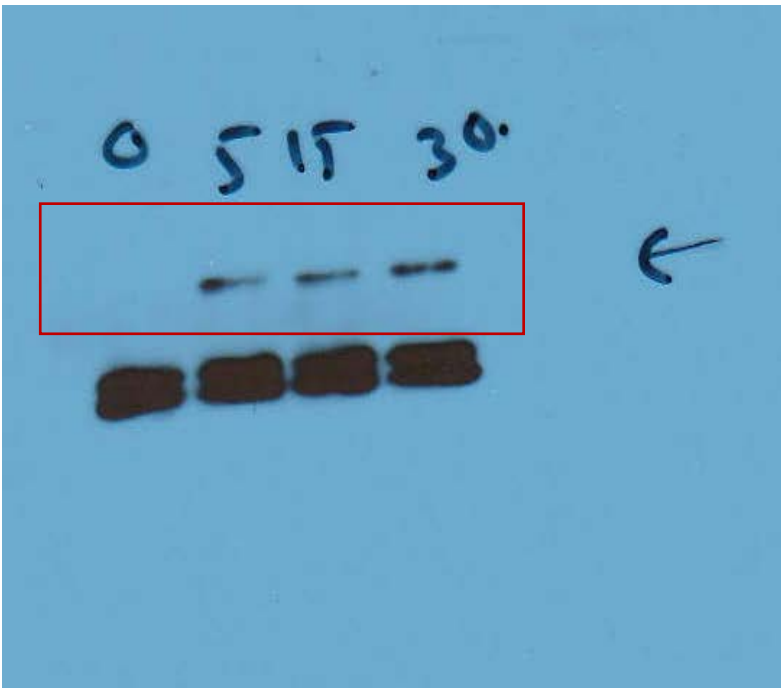

Nck1

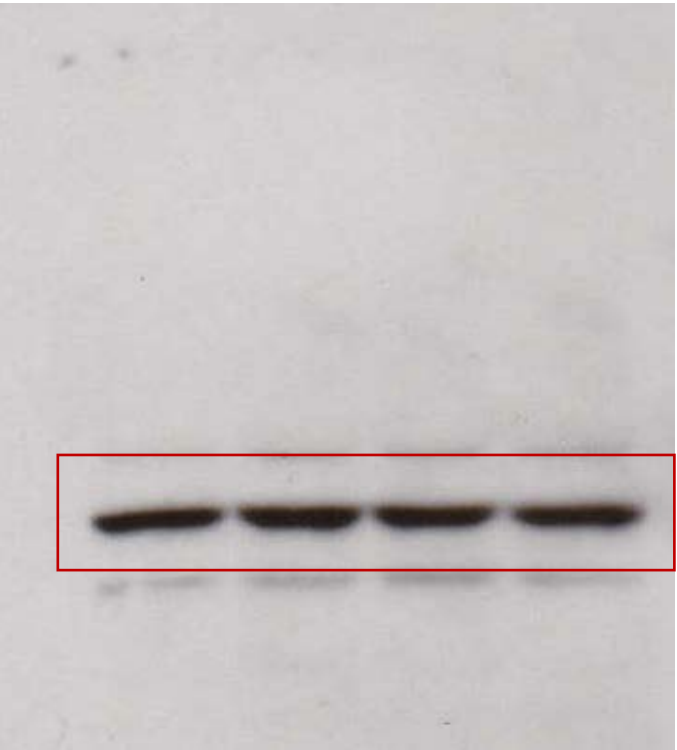

Nck1

Figure 8.

D.

Static      Laminar shear      Oscillatory shear

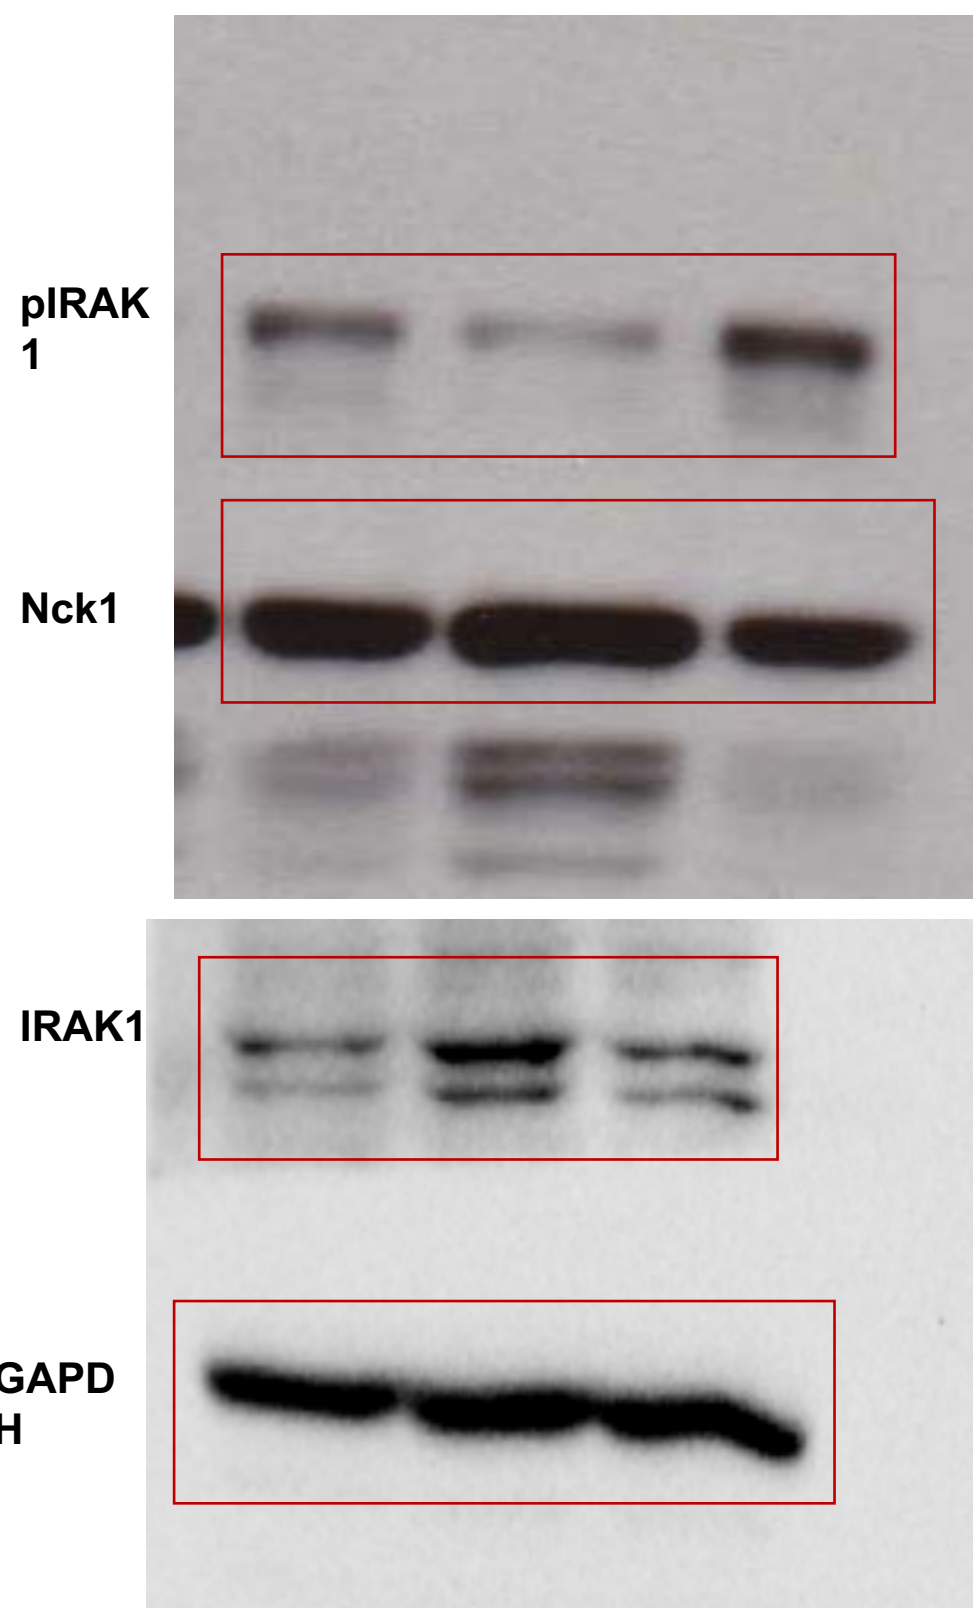

G.

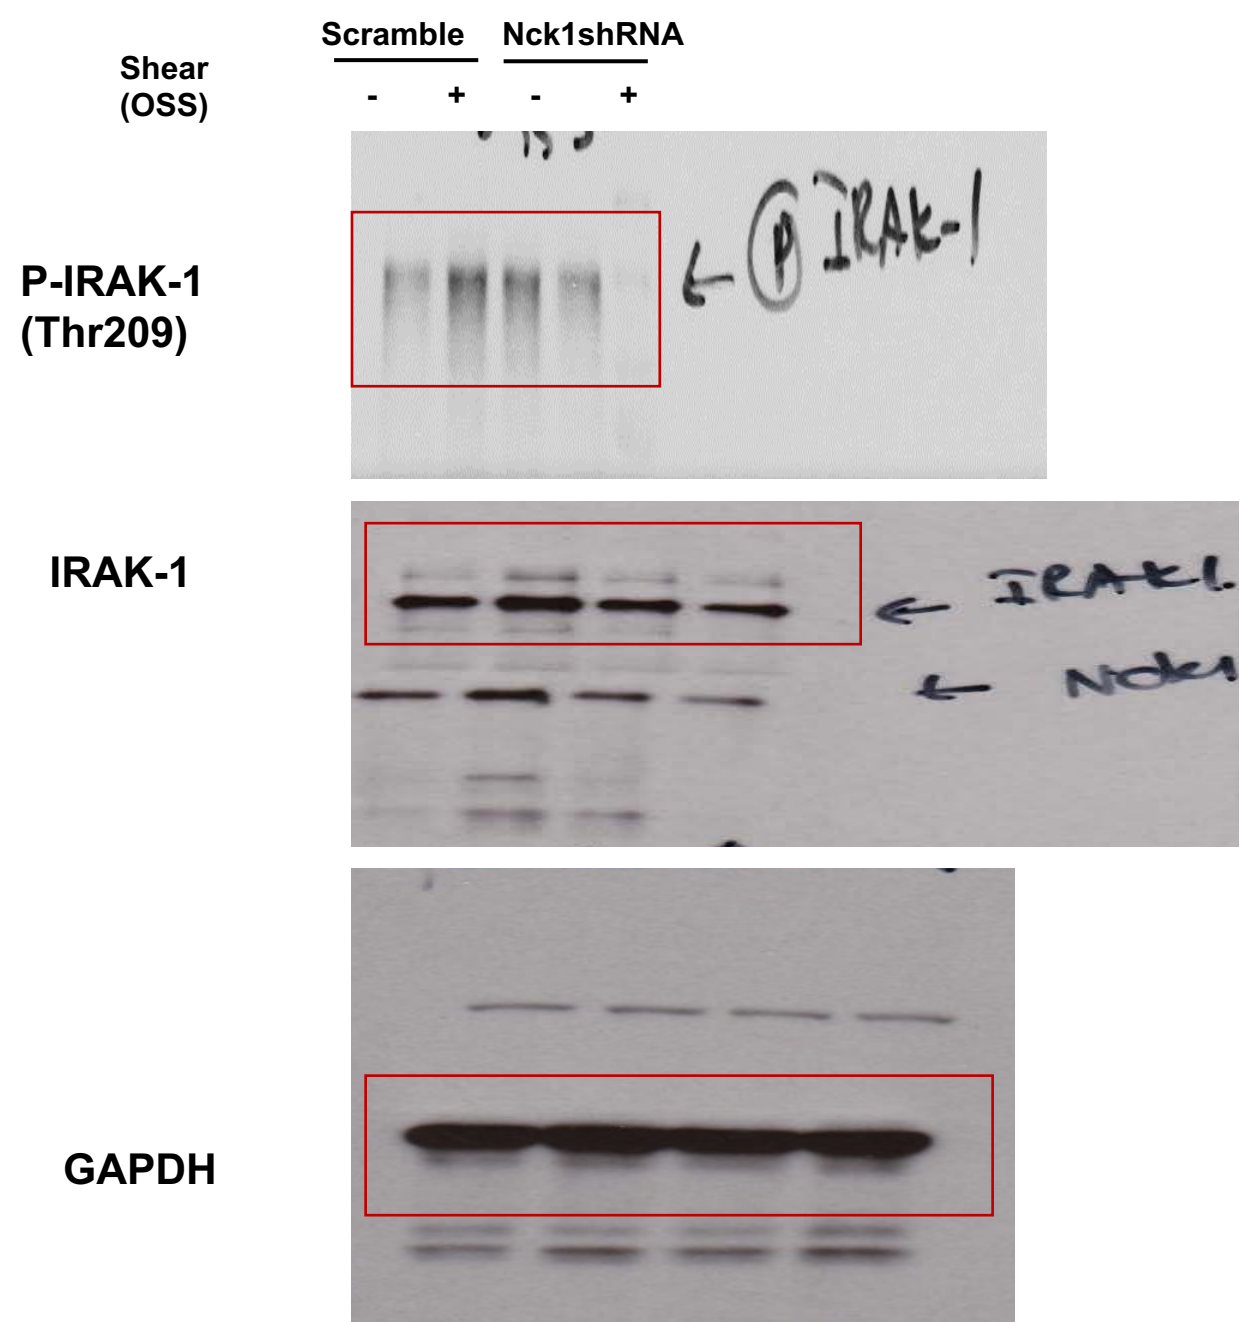

Figure 9.

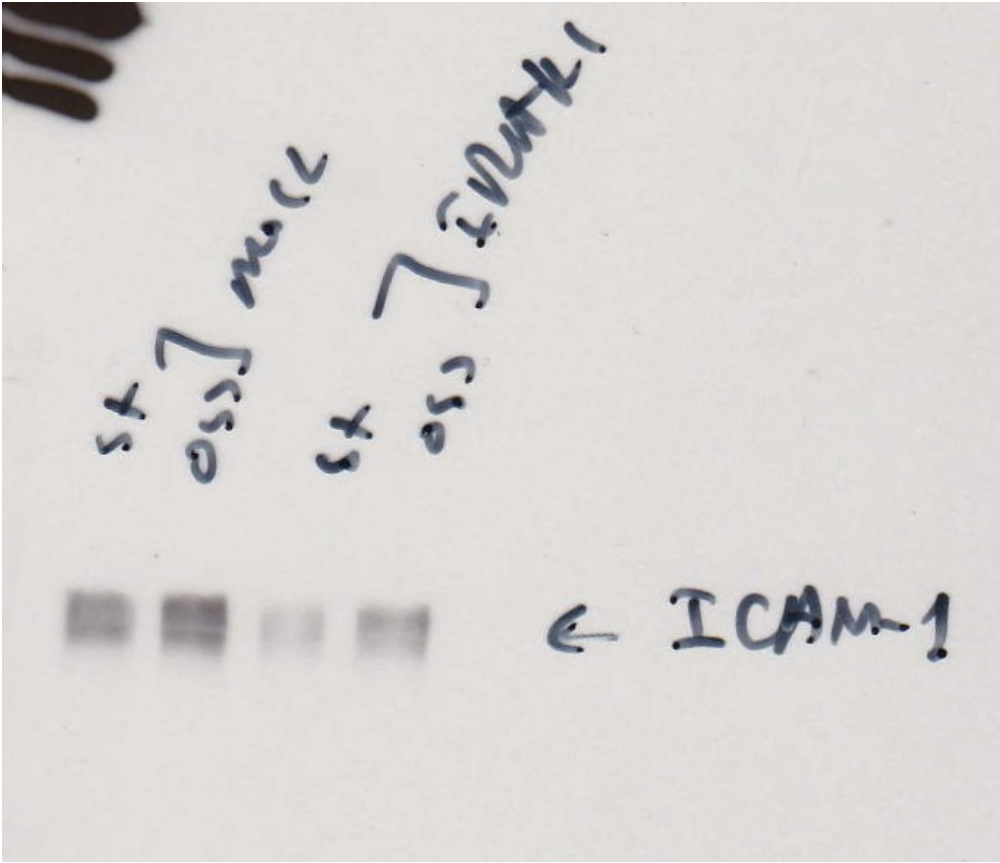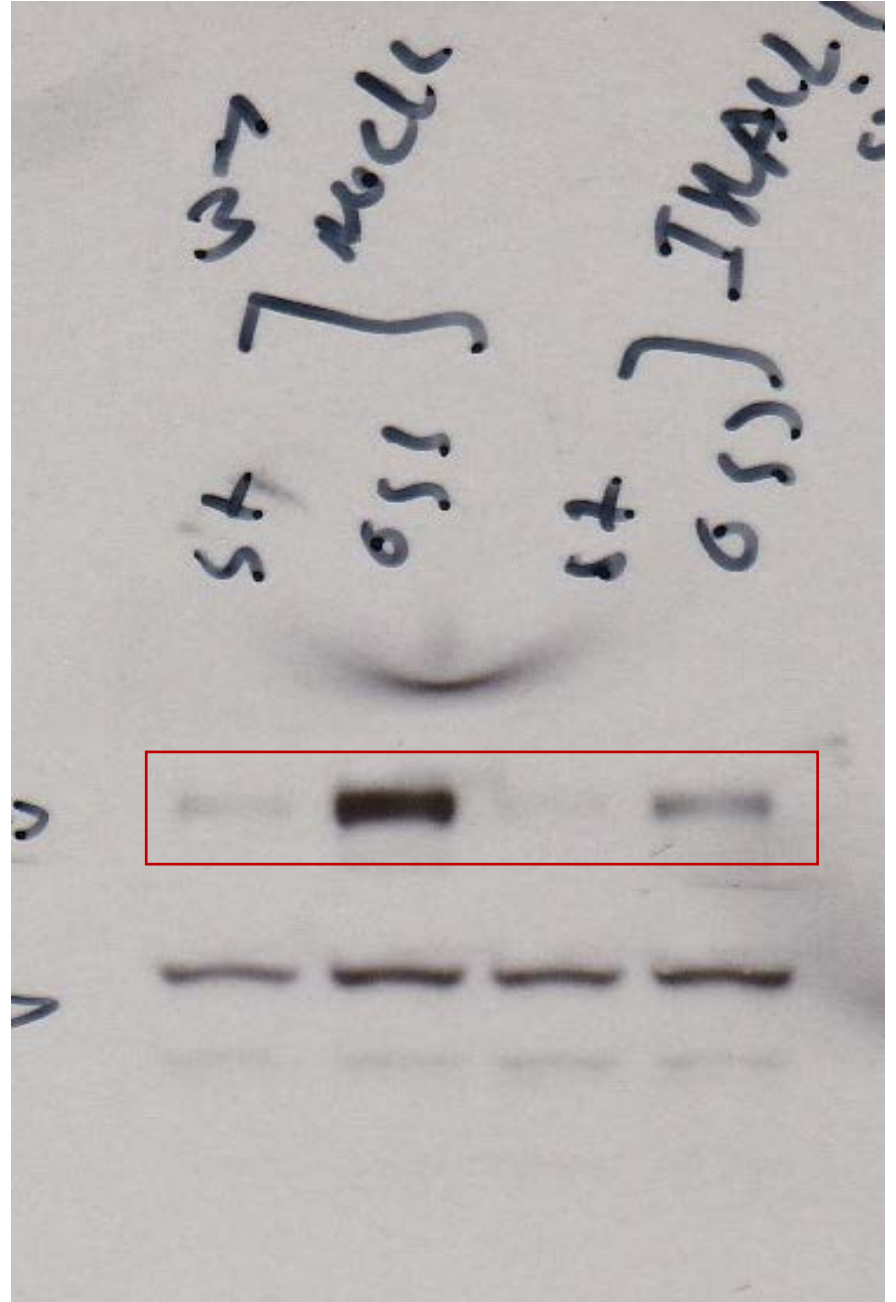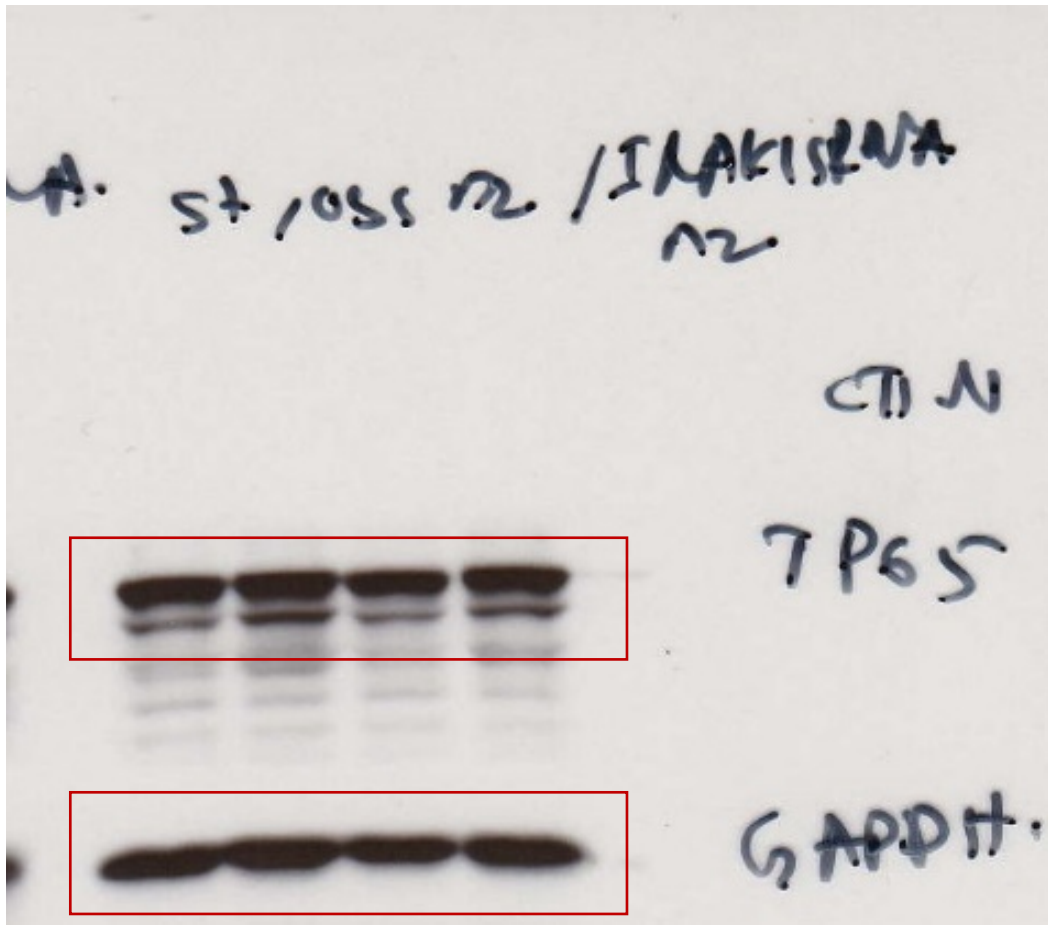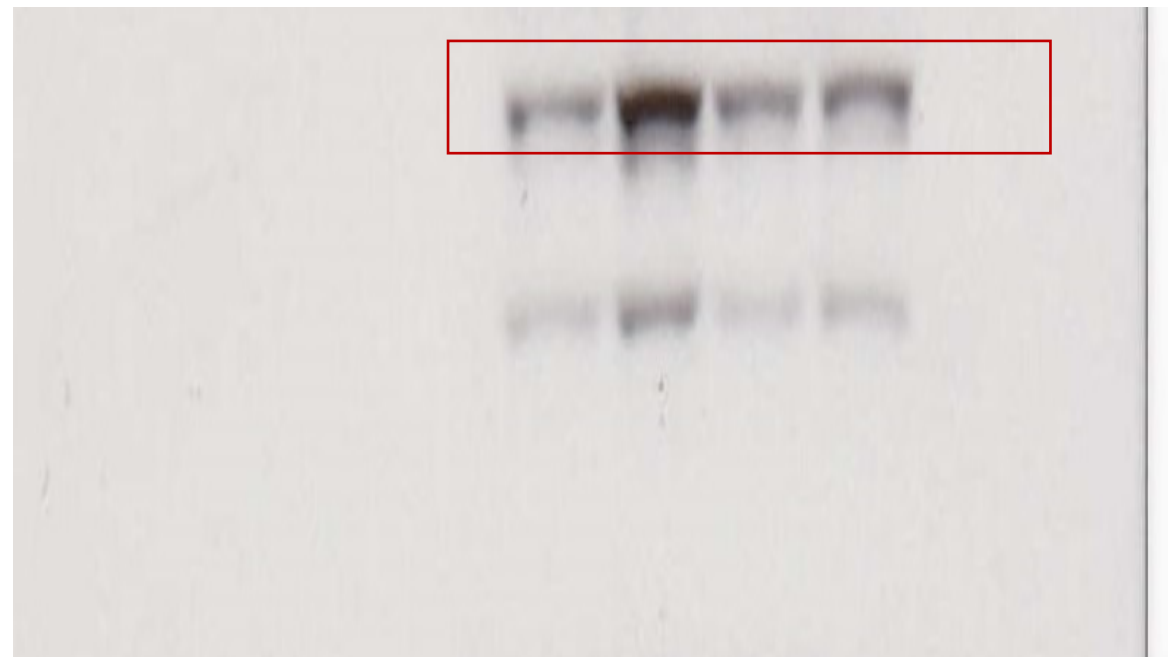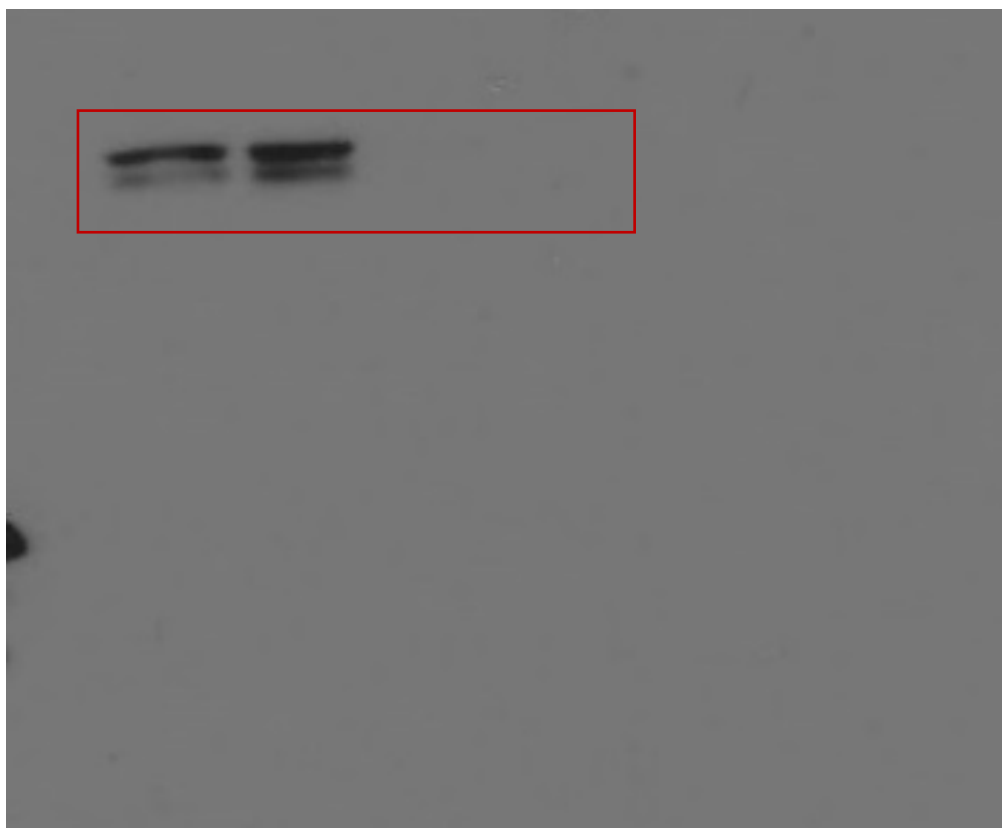



## Supplemental Figures

# Supplemental Figure 1.

**A.**

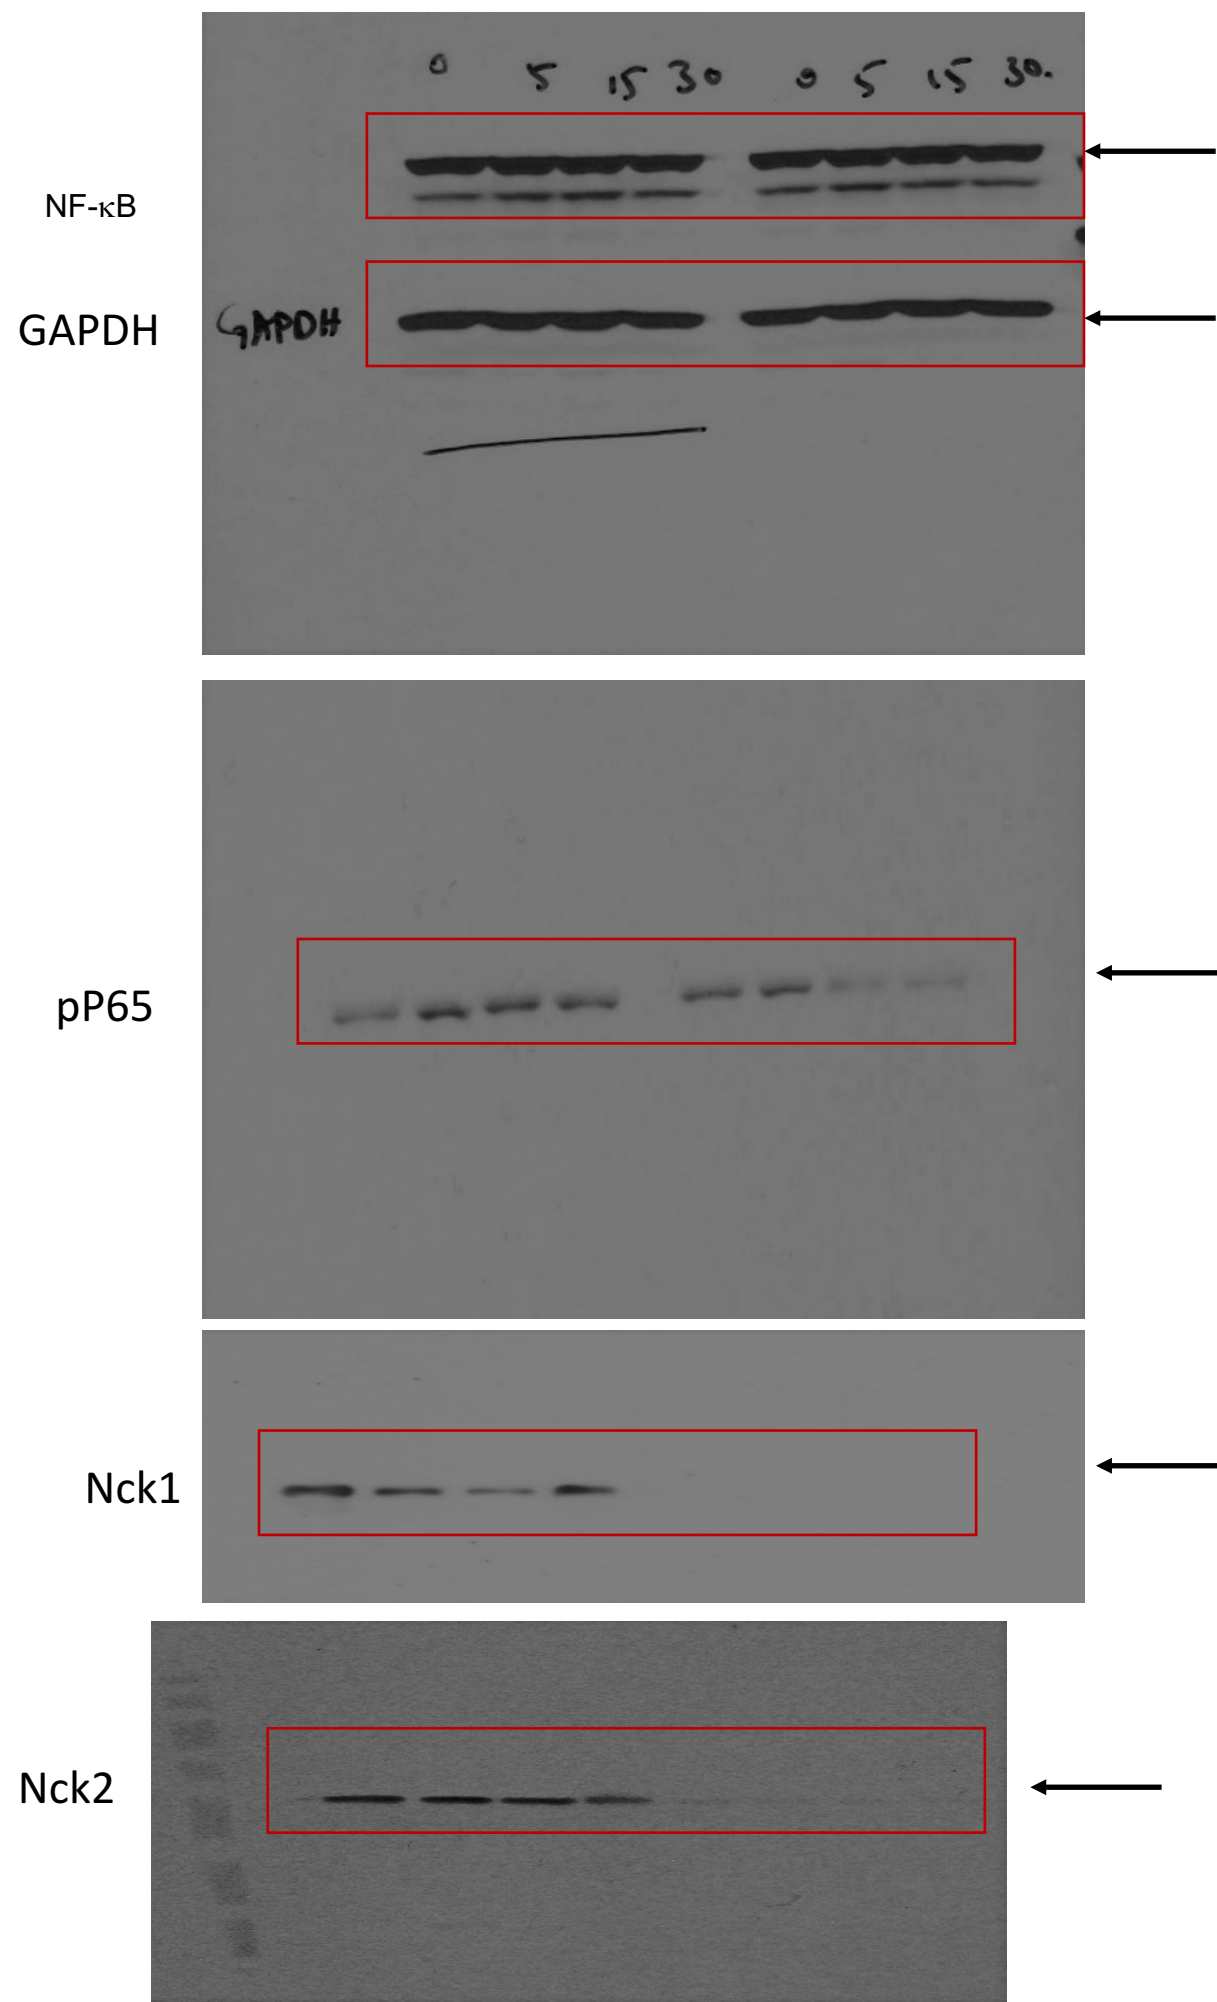

**G**

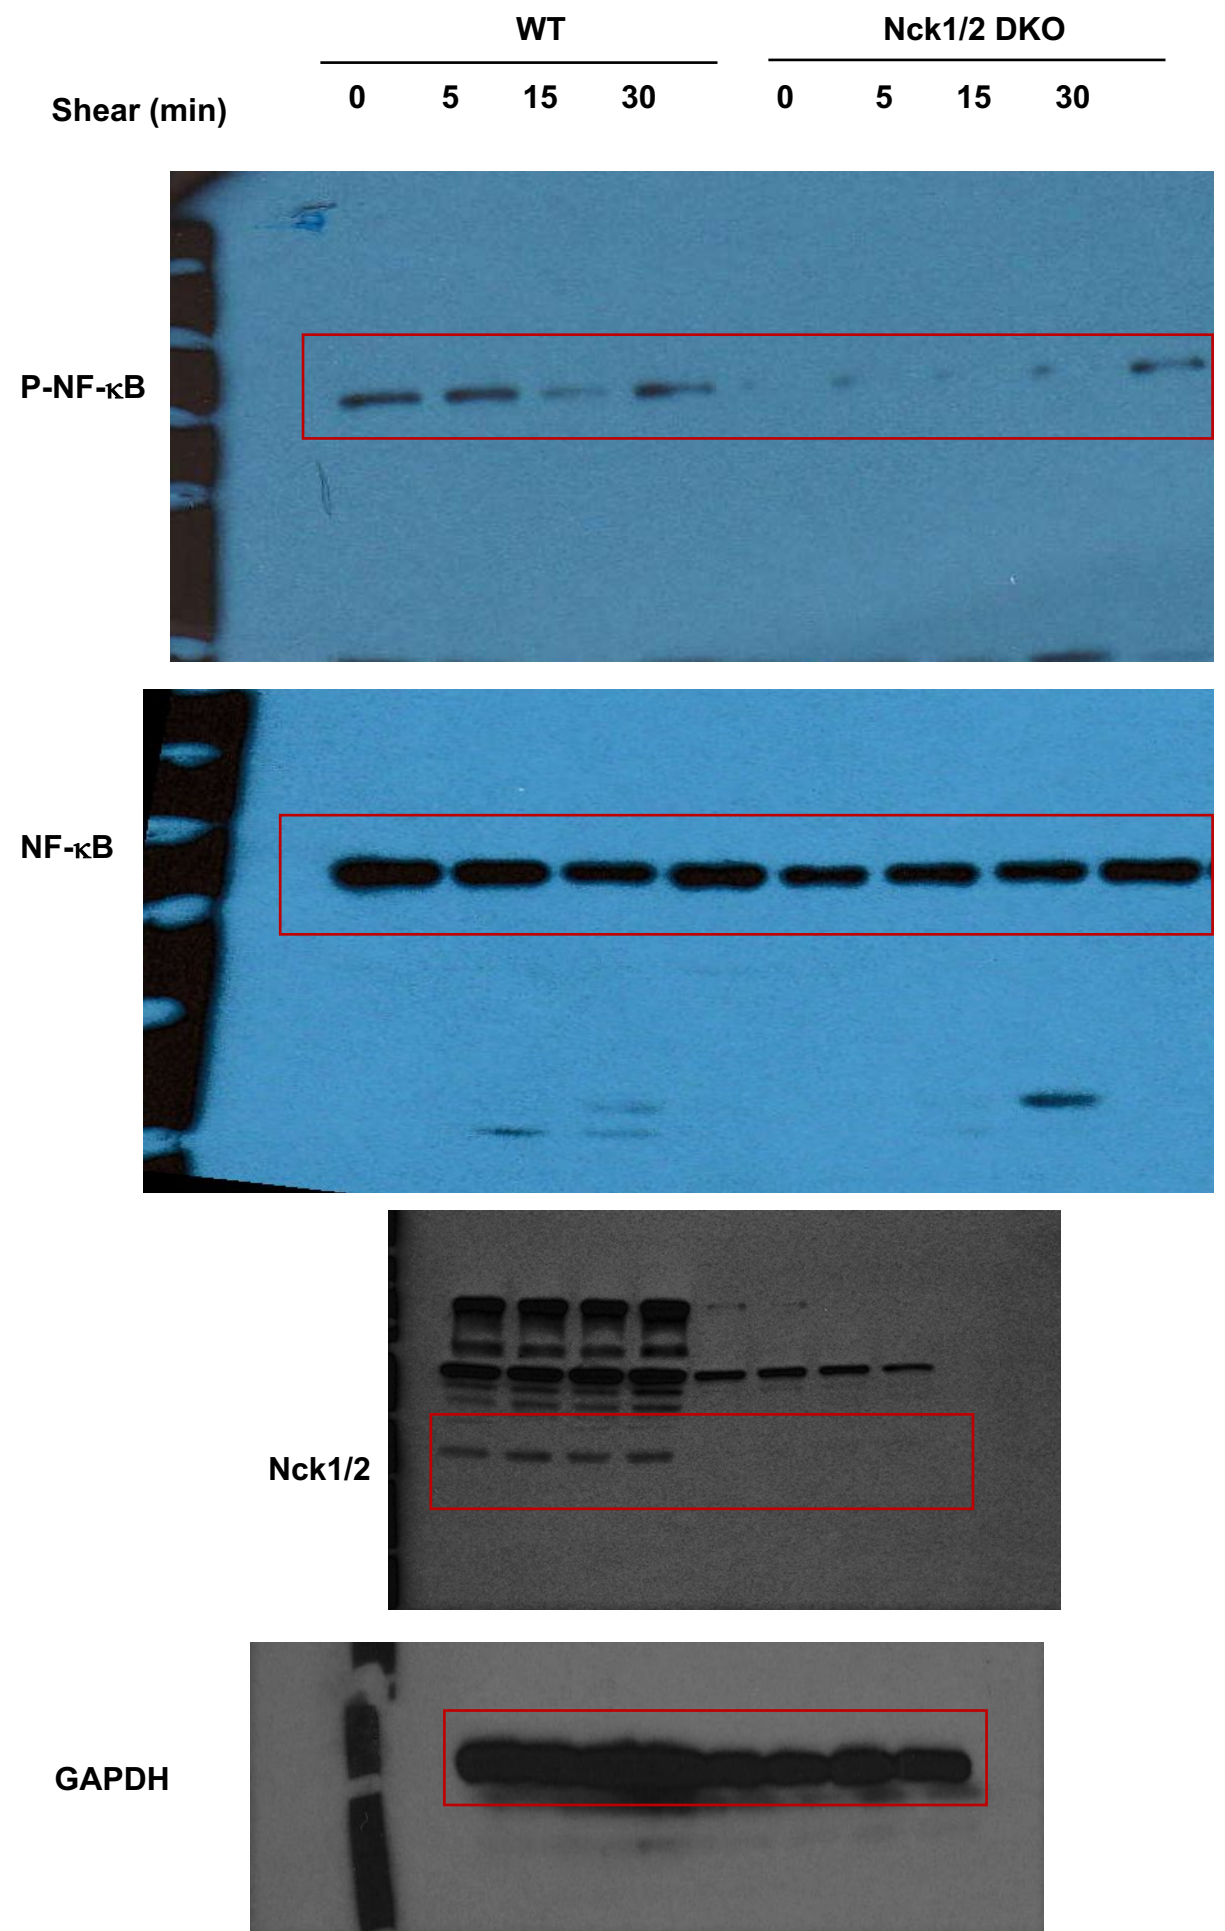

# Supplemental Figure 1.

H

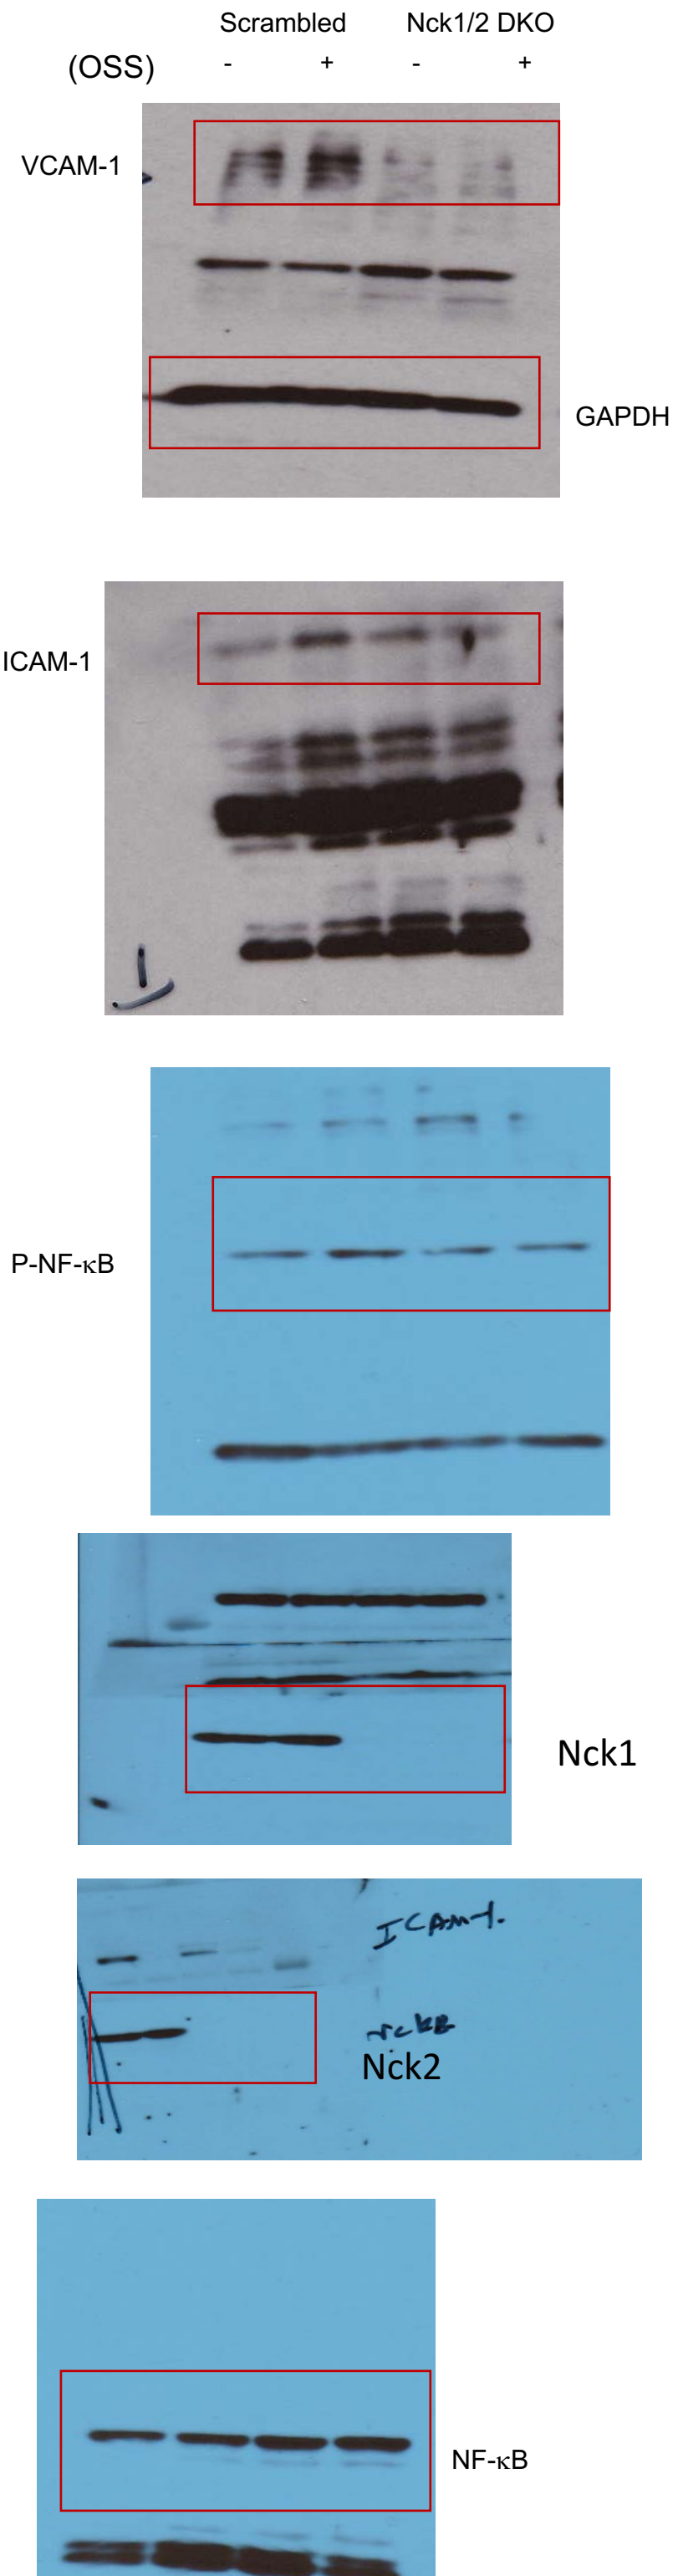

# Supplemental Figure 2.

A.

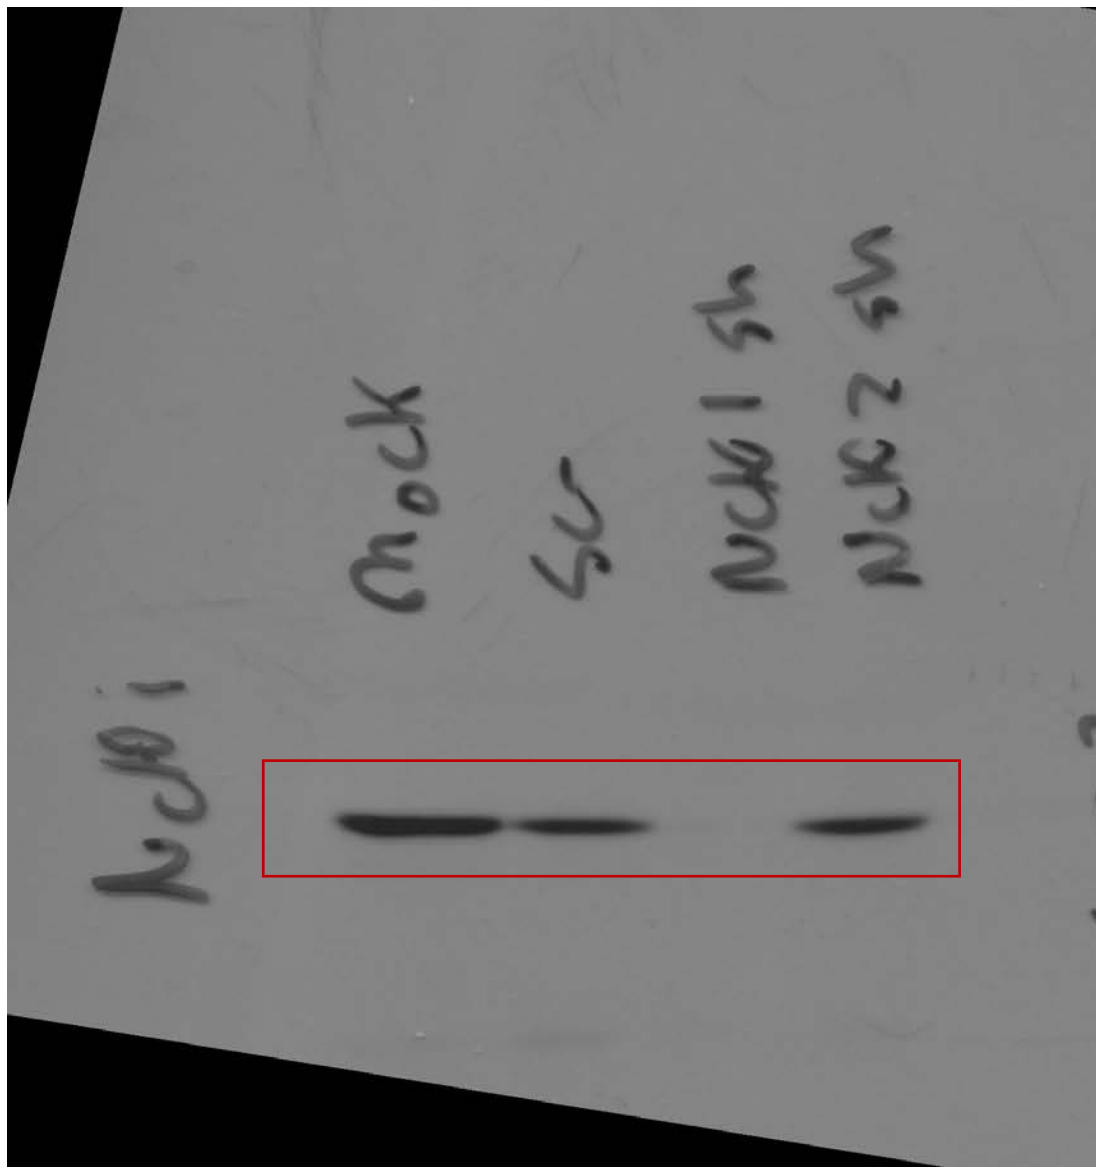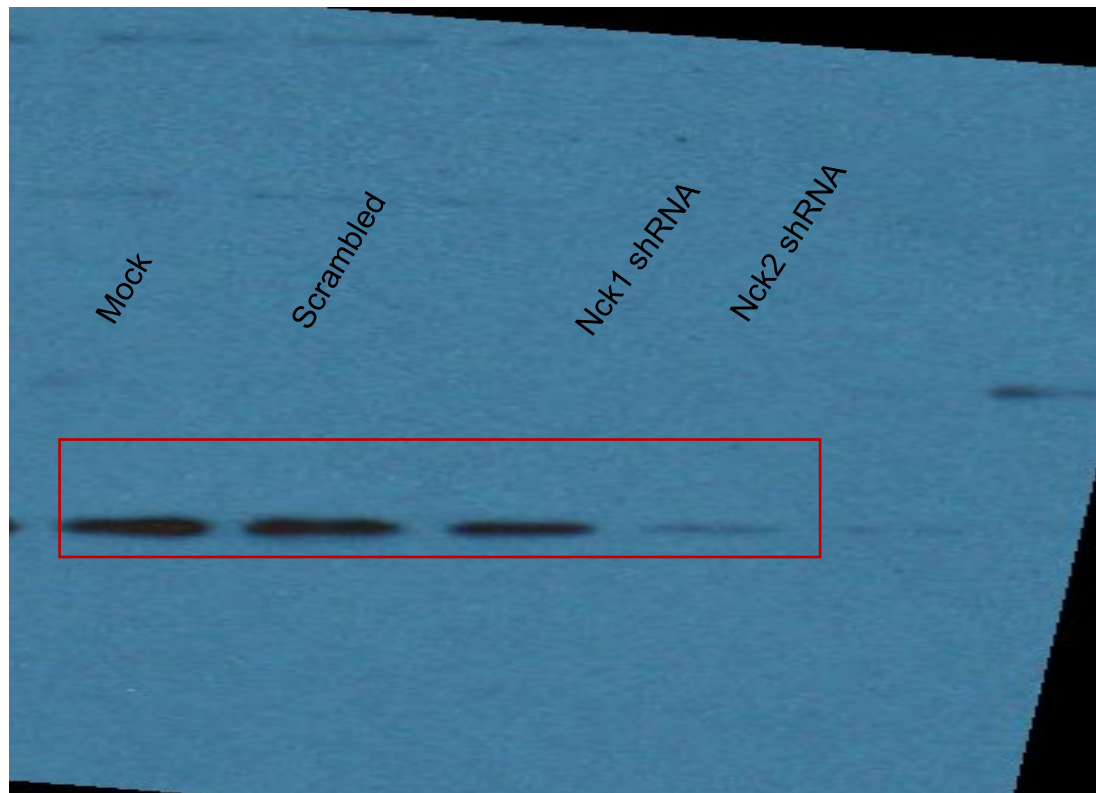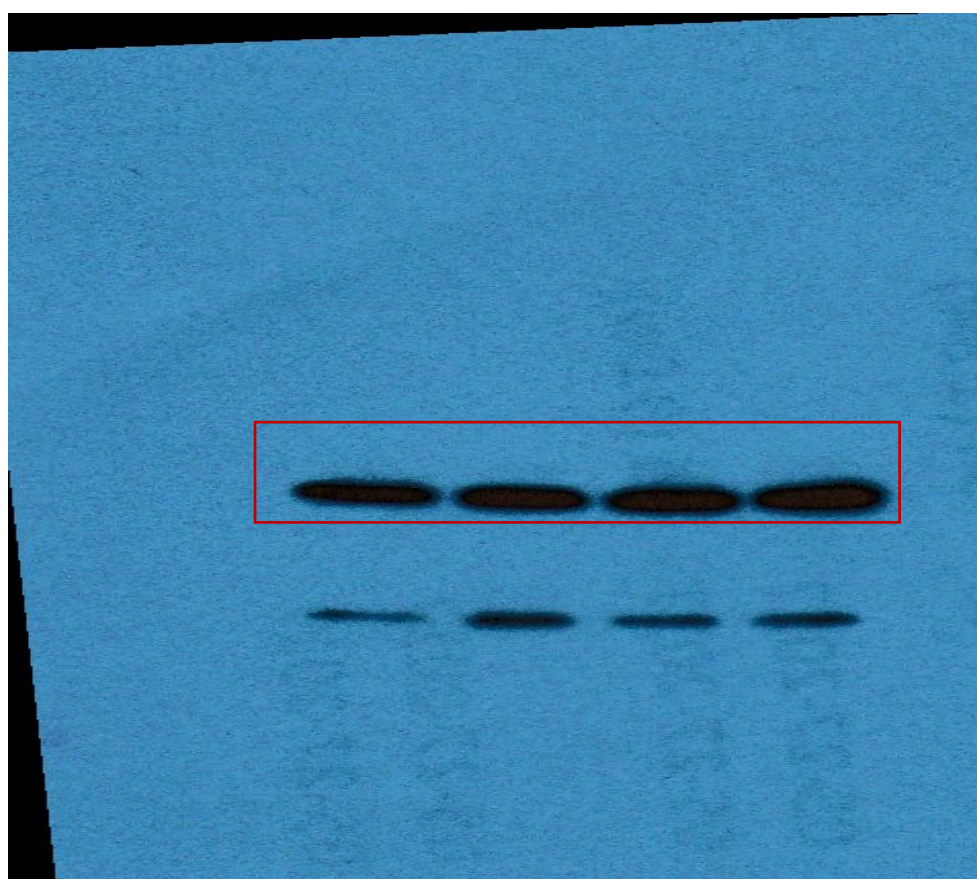

B.

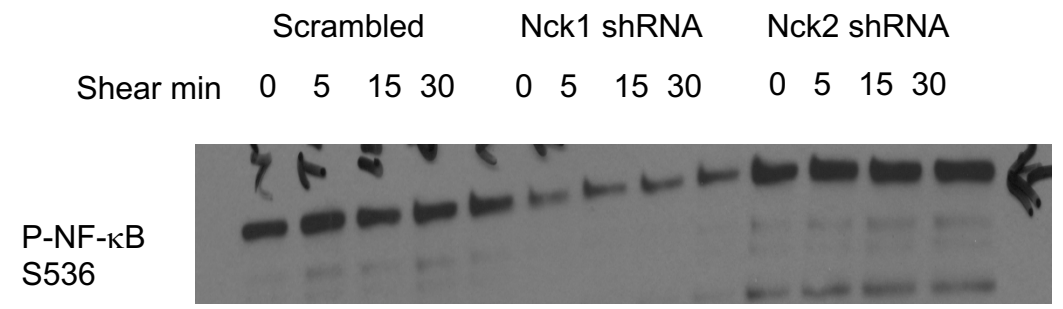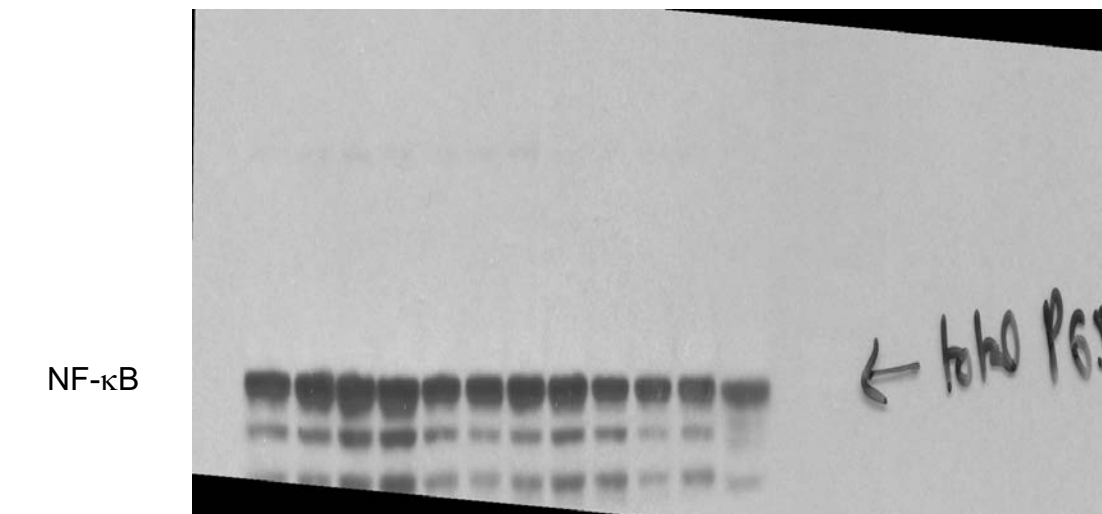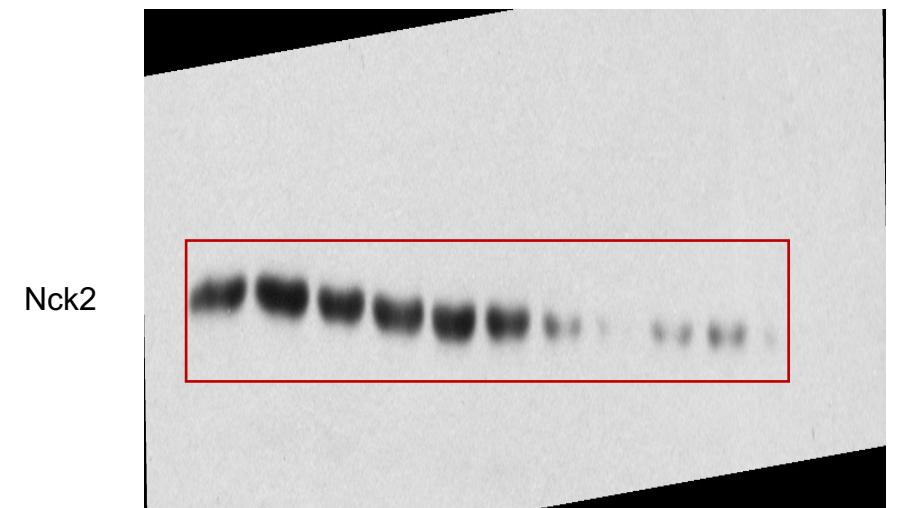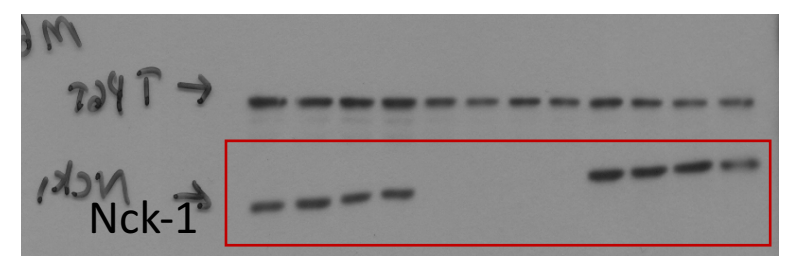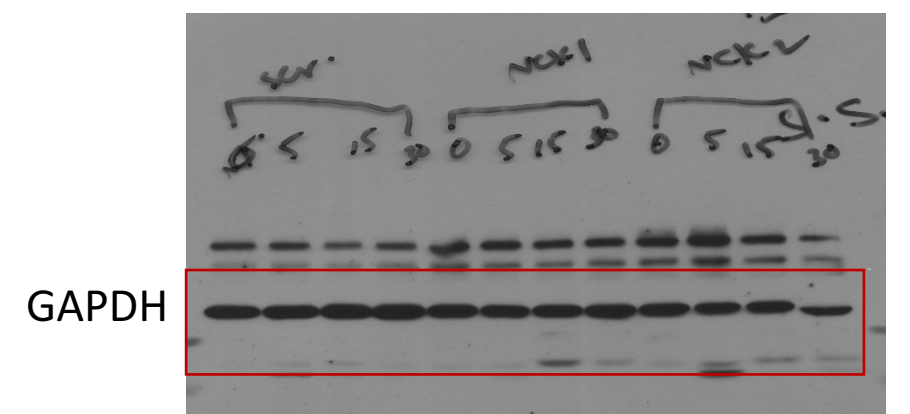

# Supplemental Figure 2.

H.

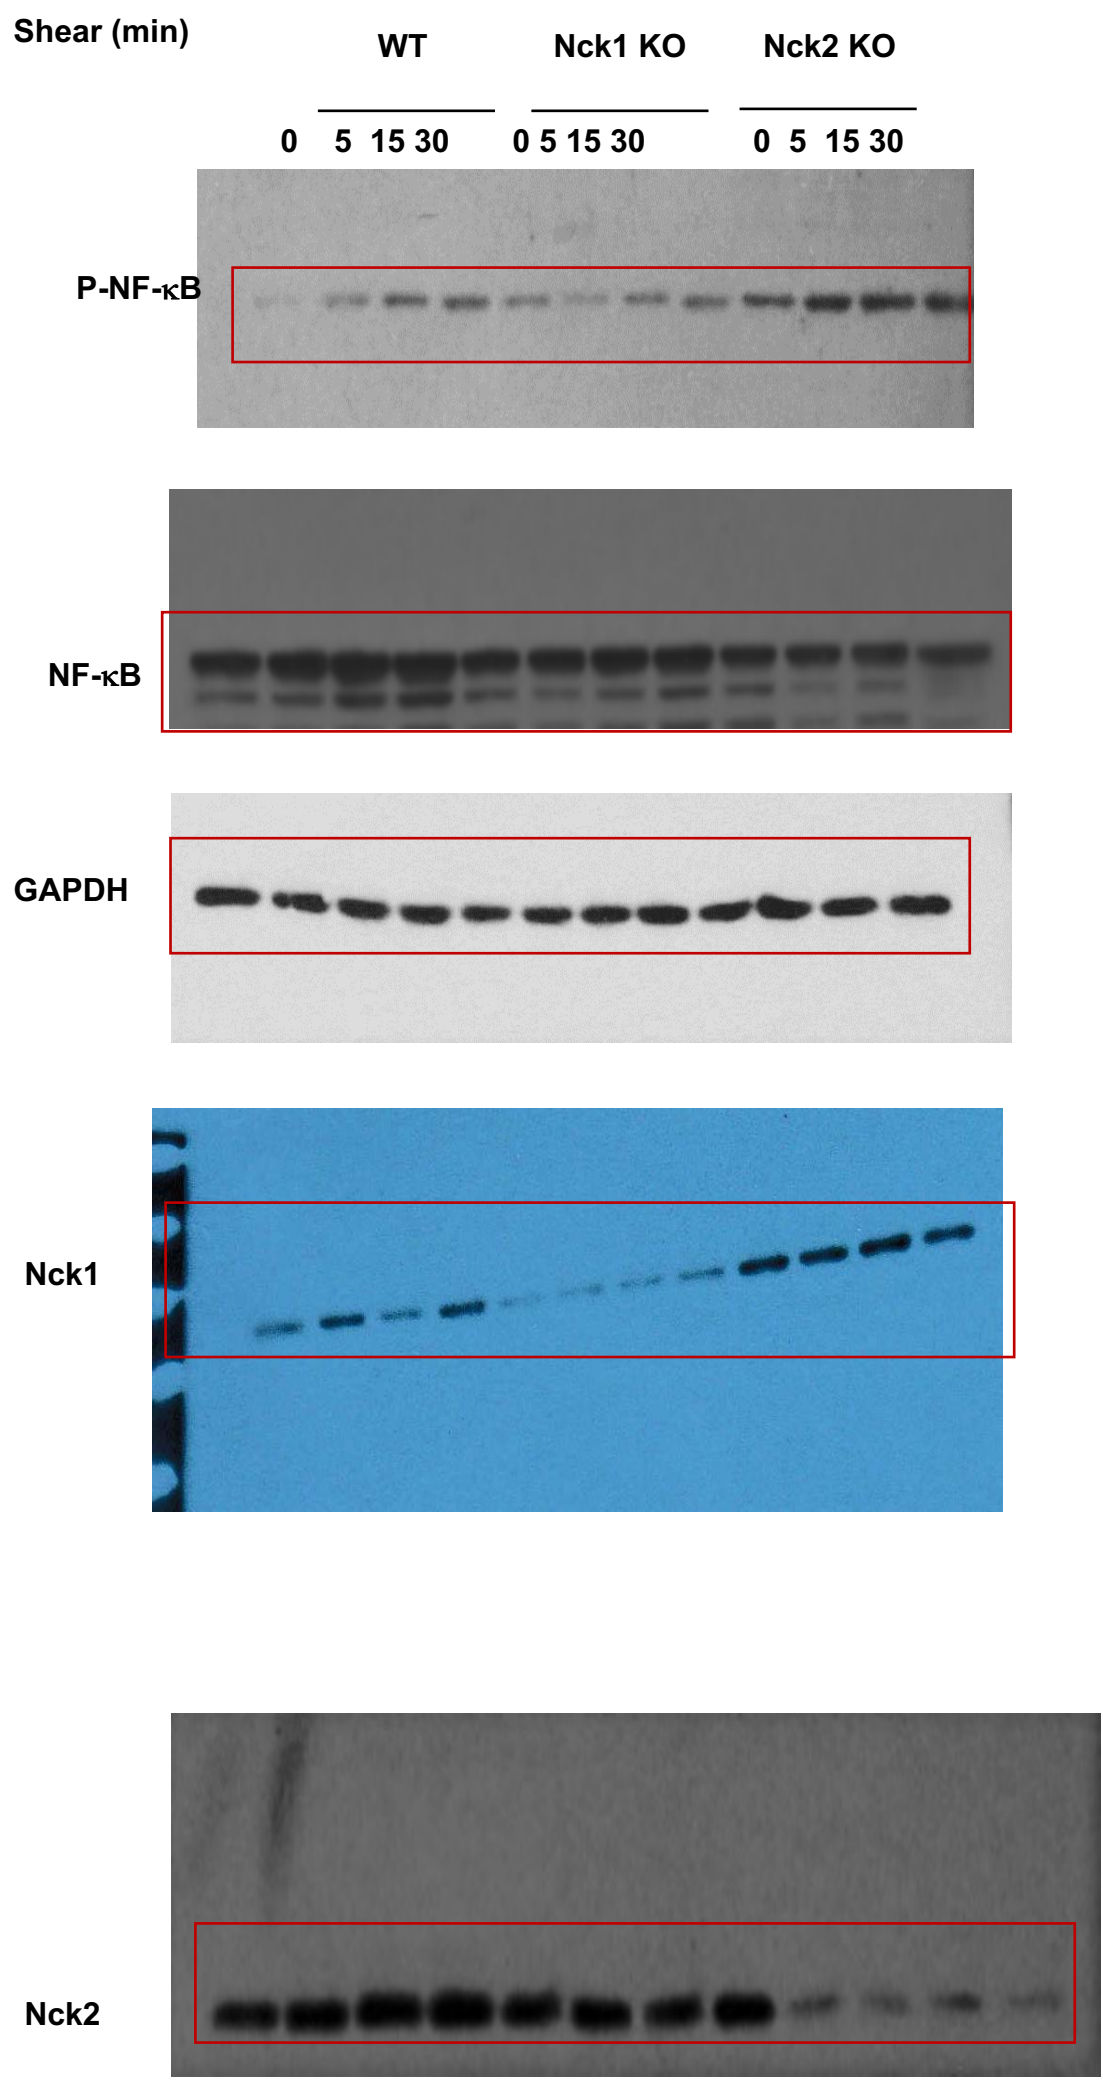

# Supplemental Figure 2.

I.

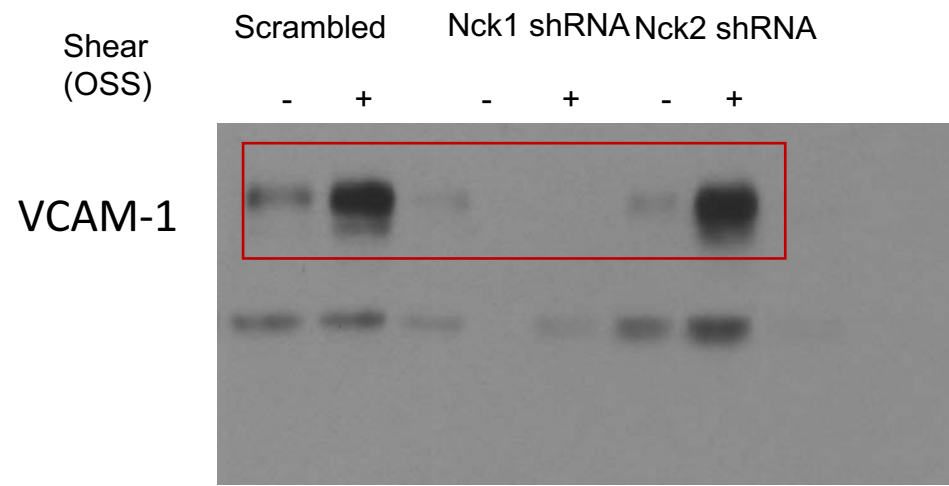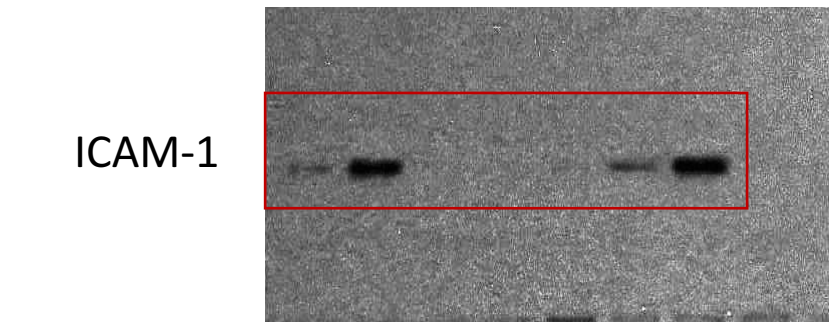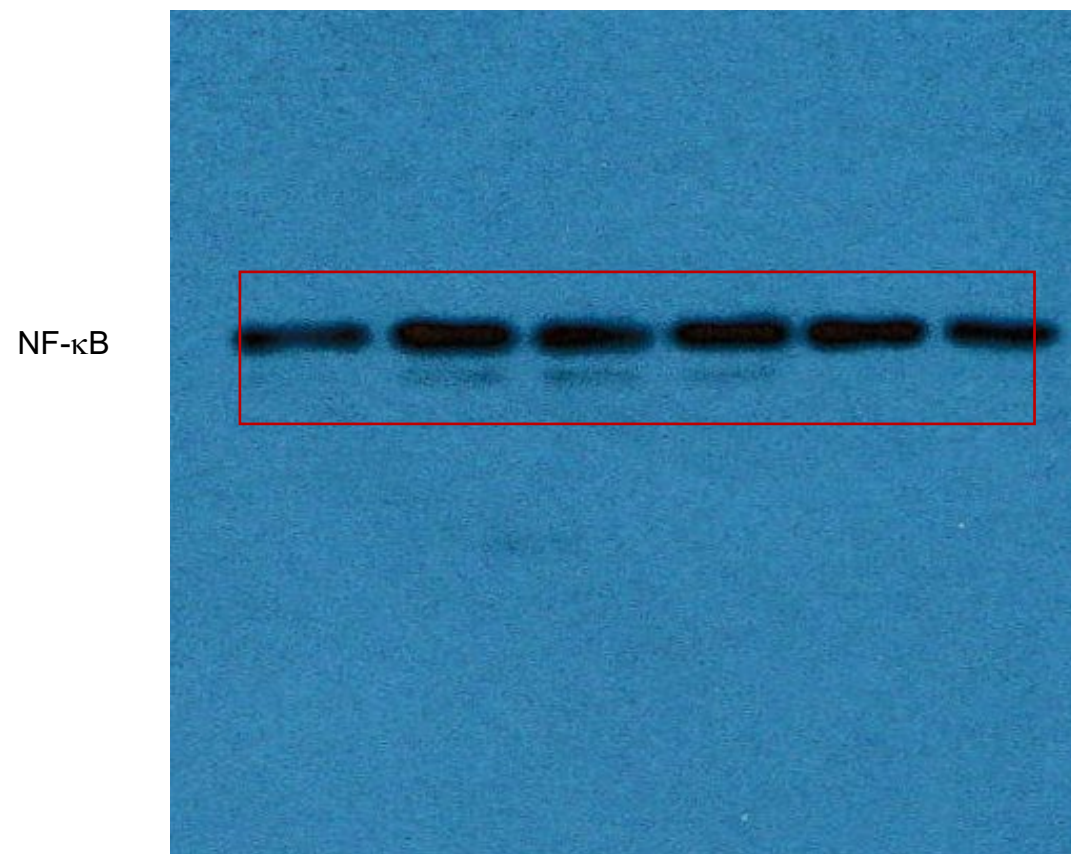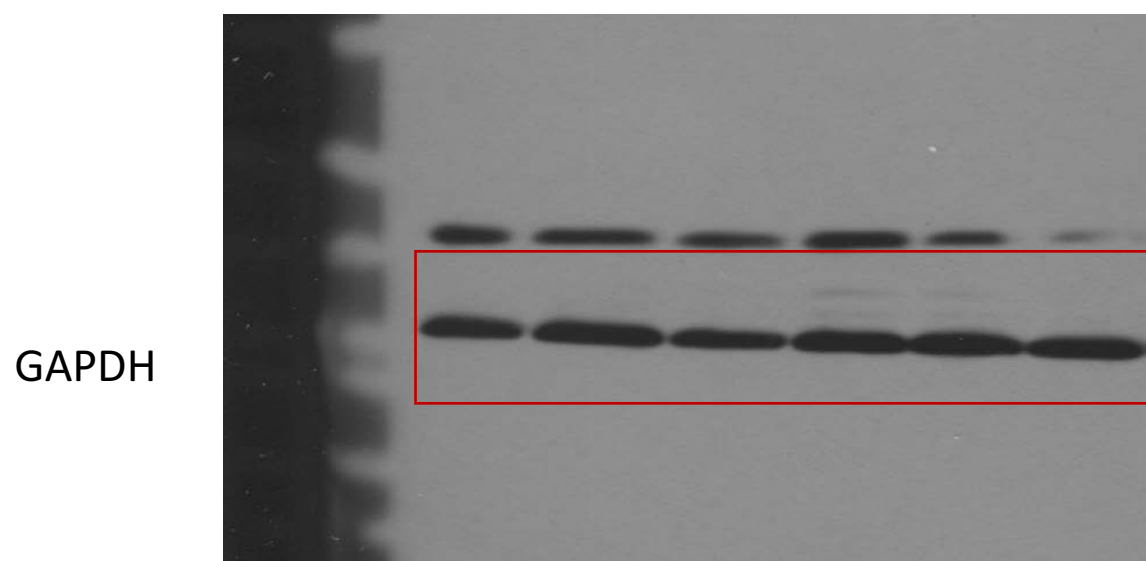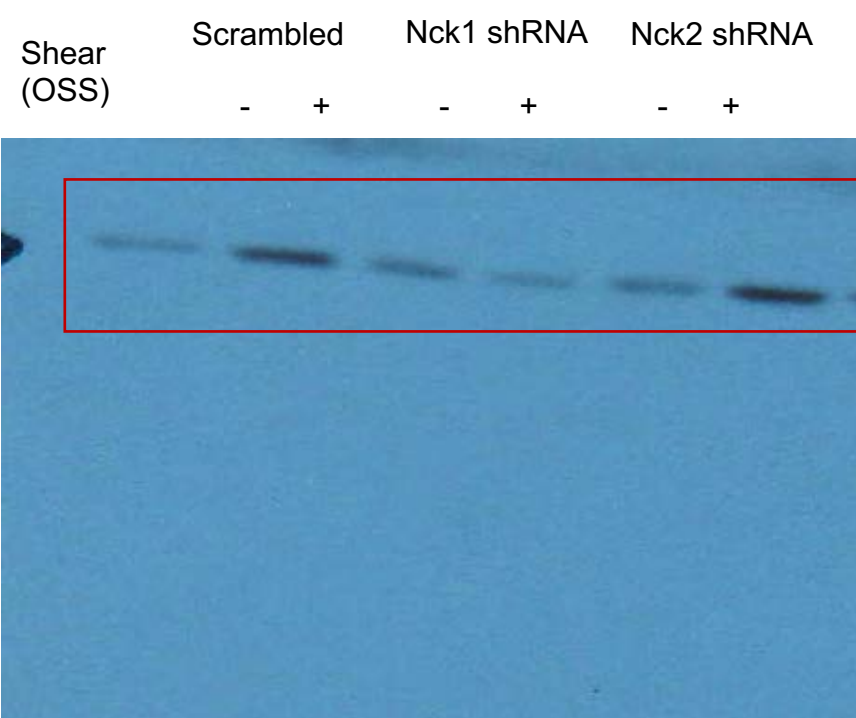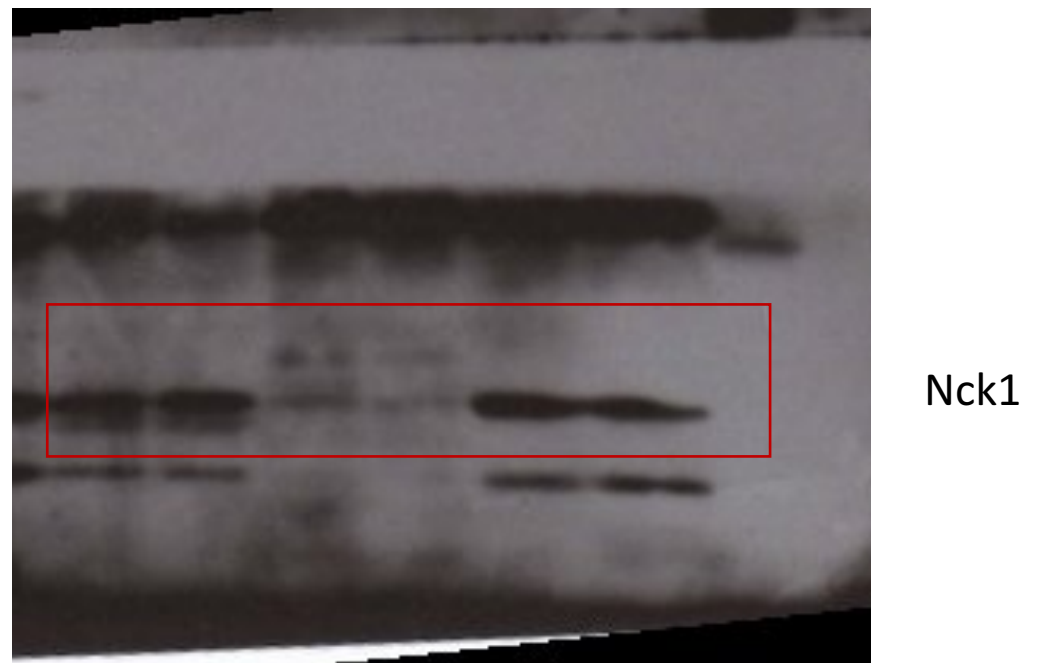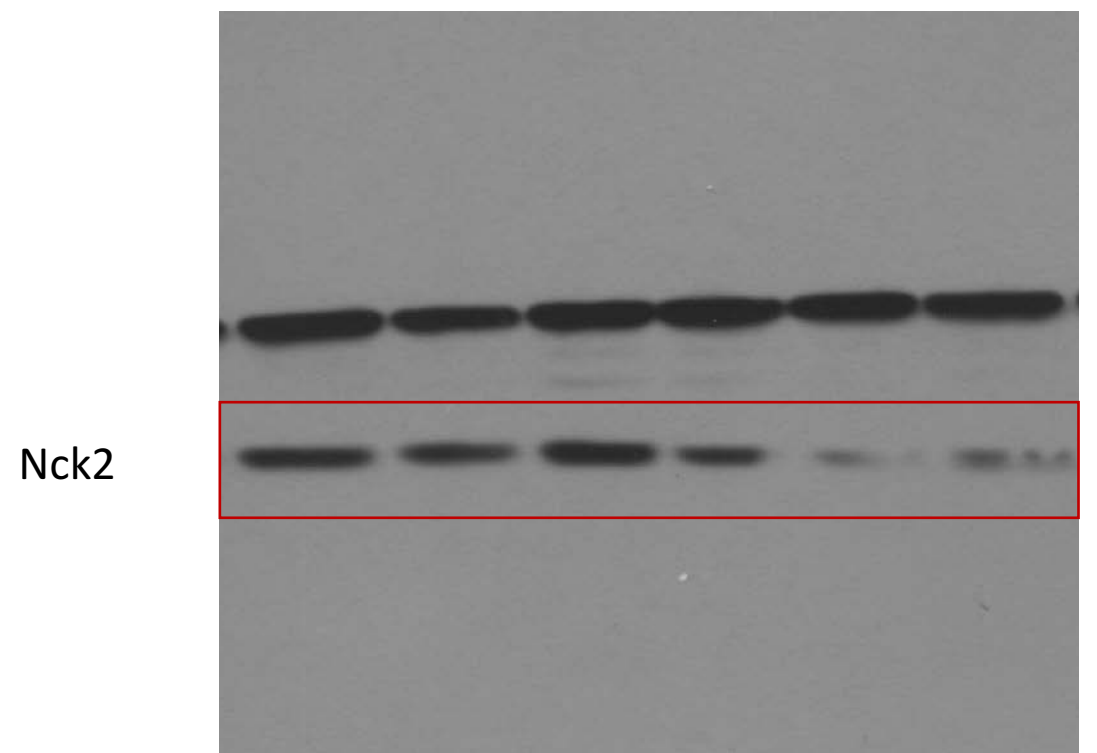

# Supplemental Figure 3.

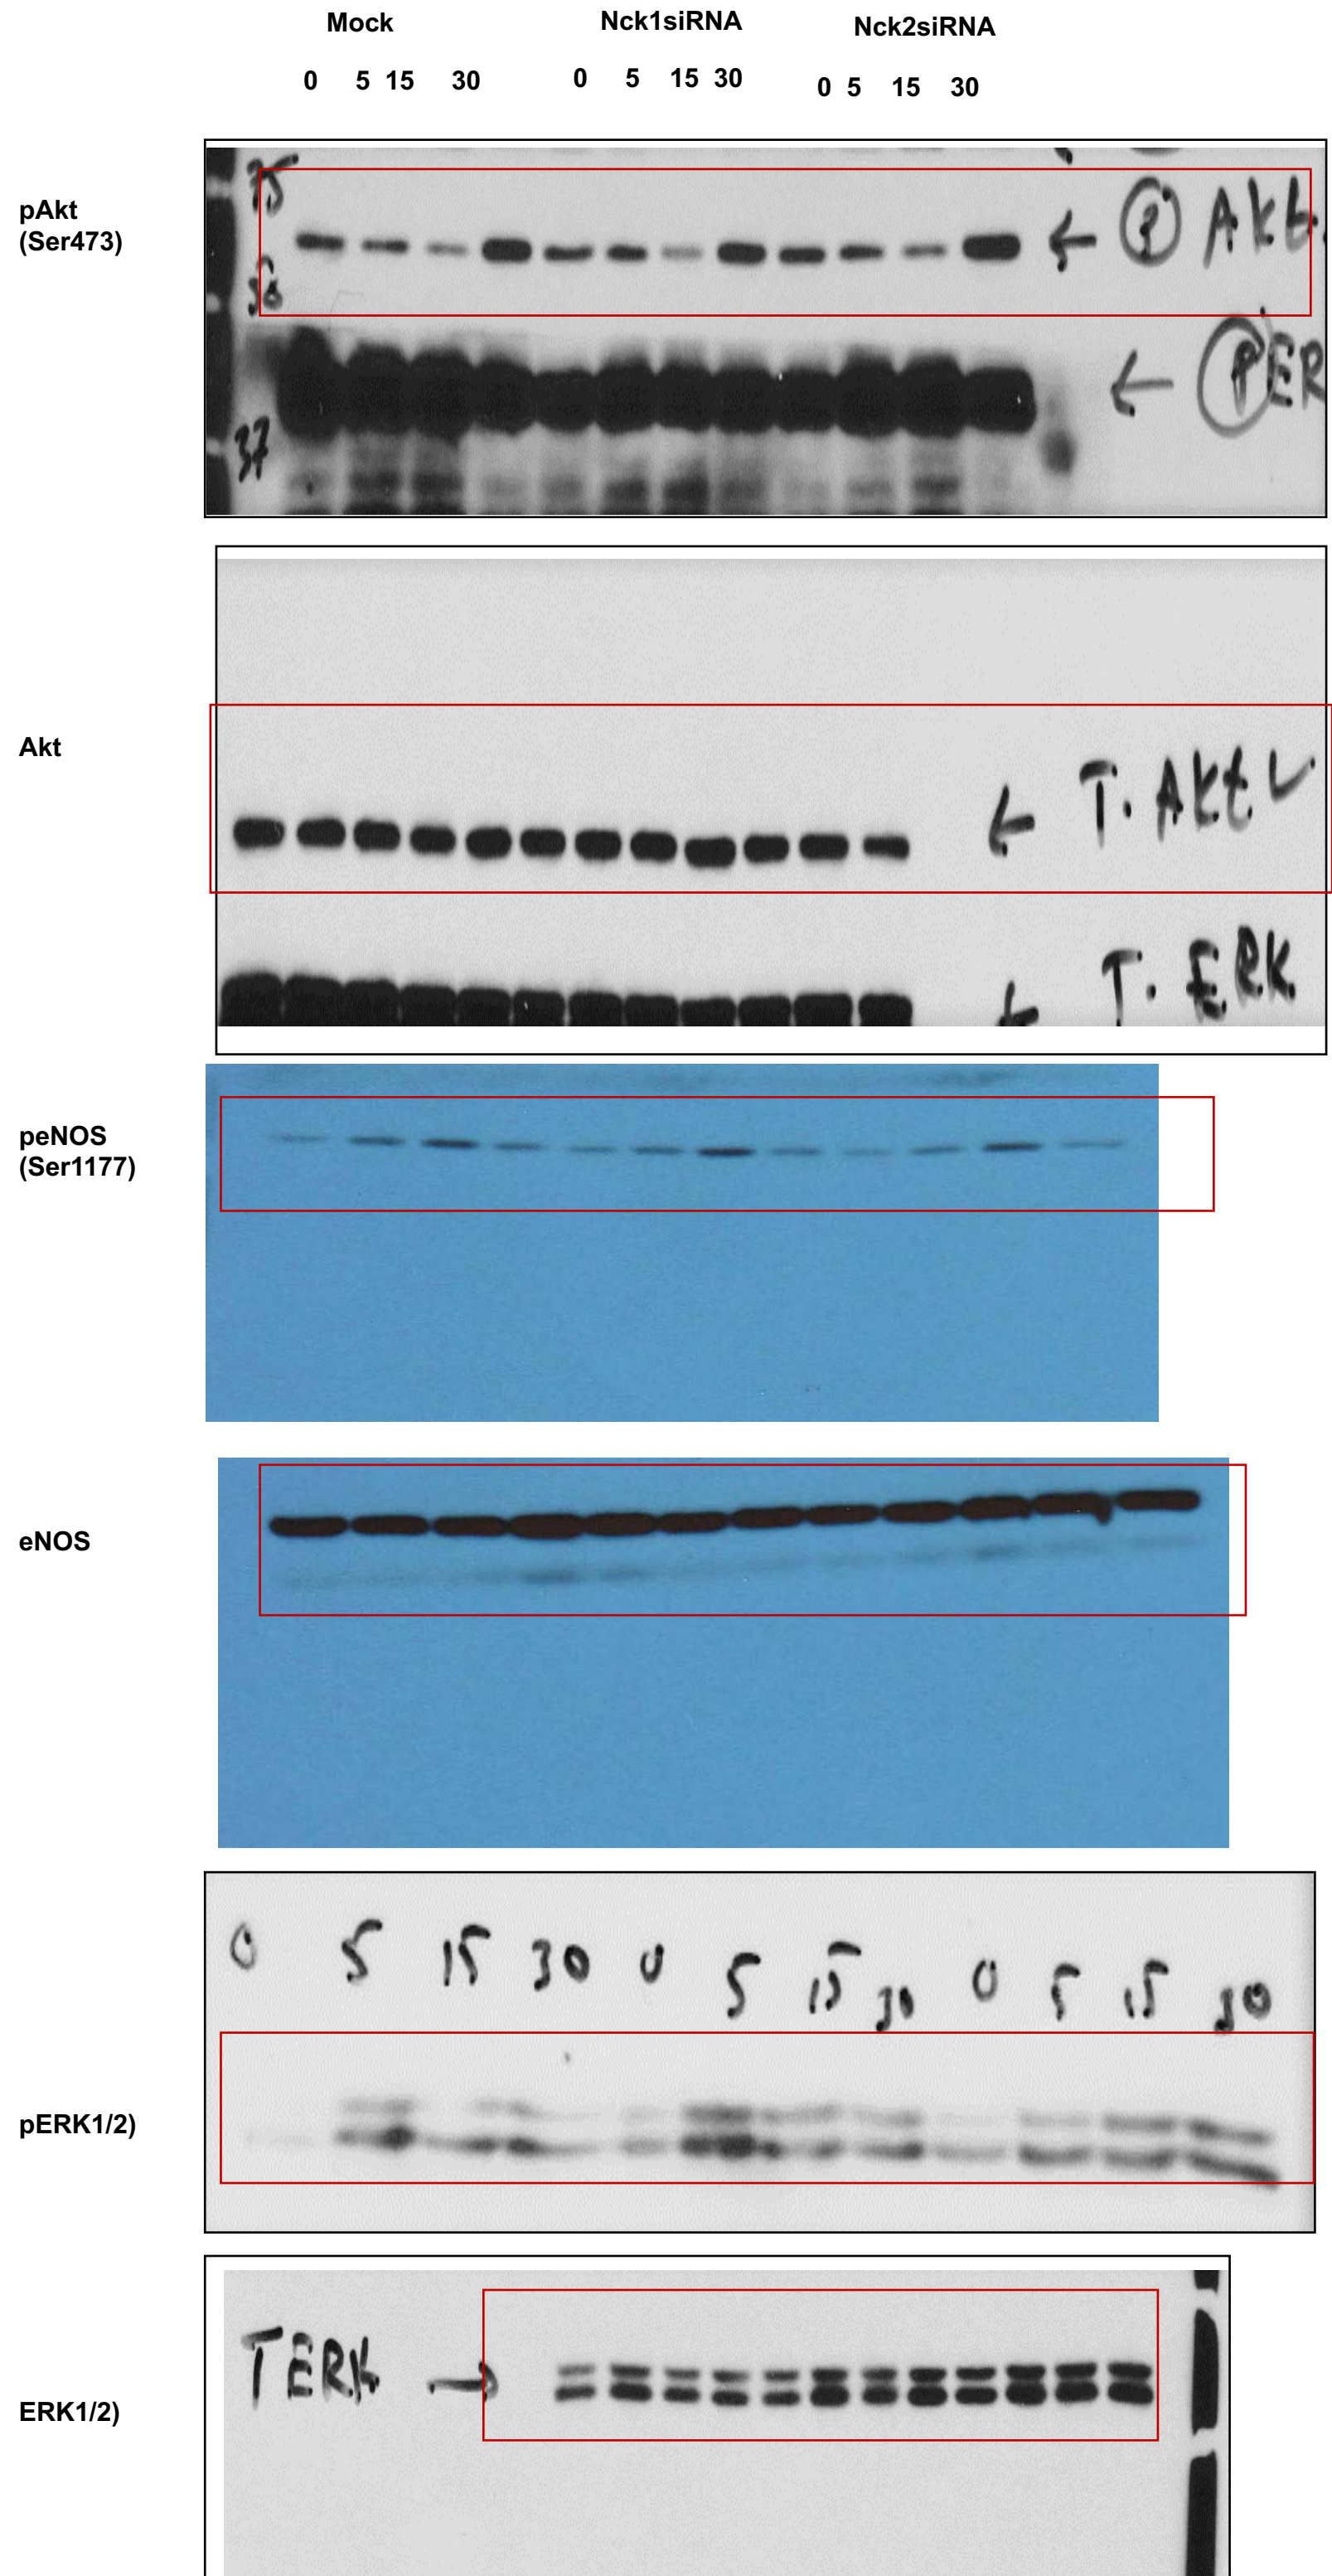

Supplemental Figure 11

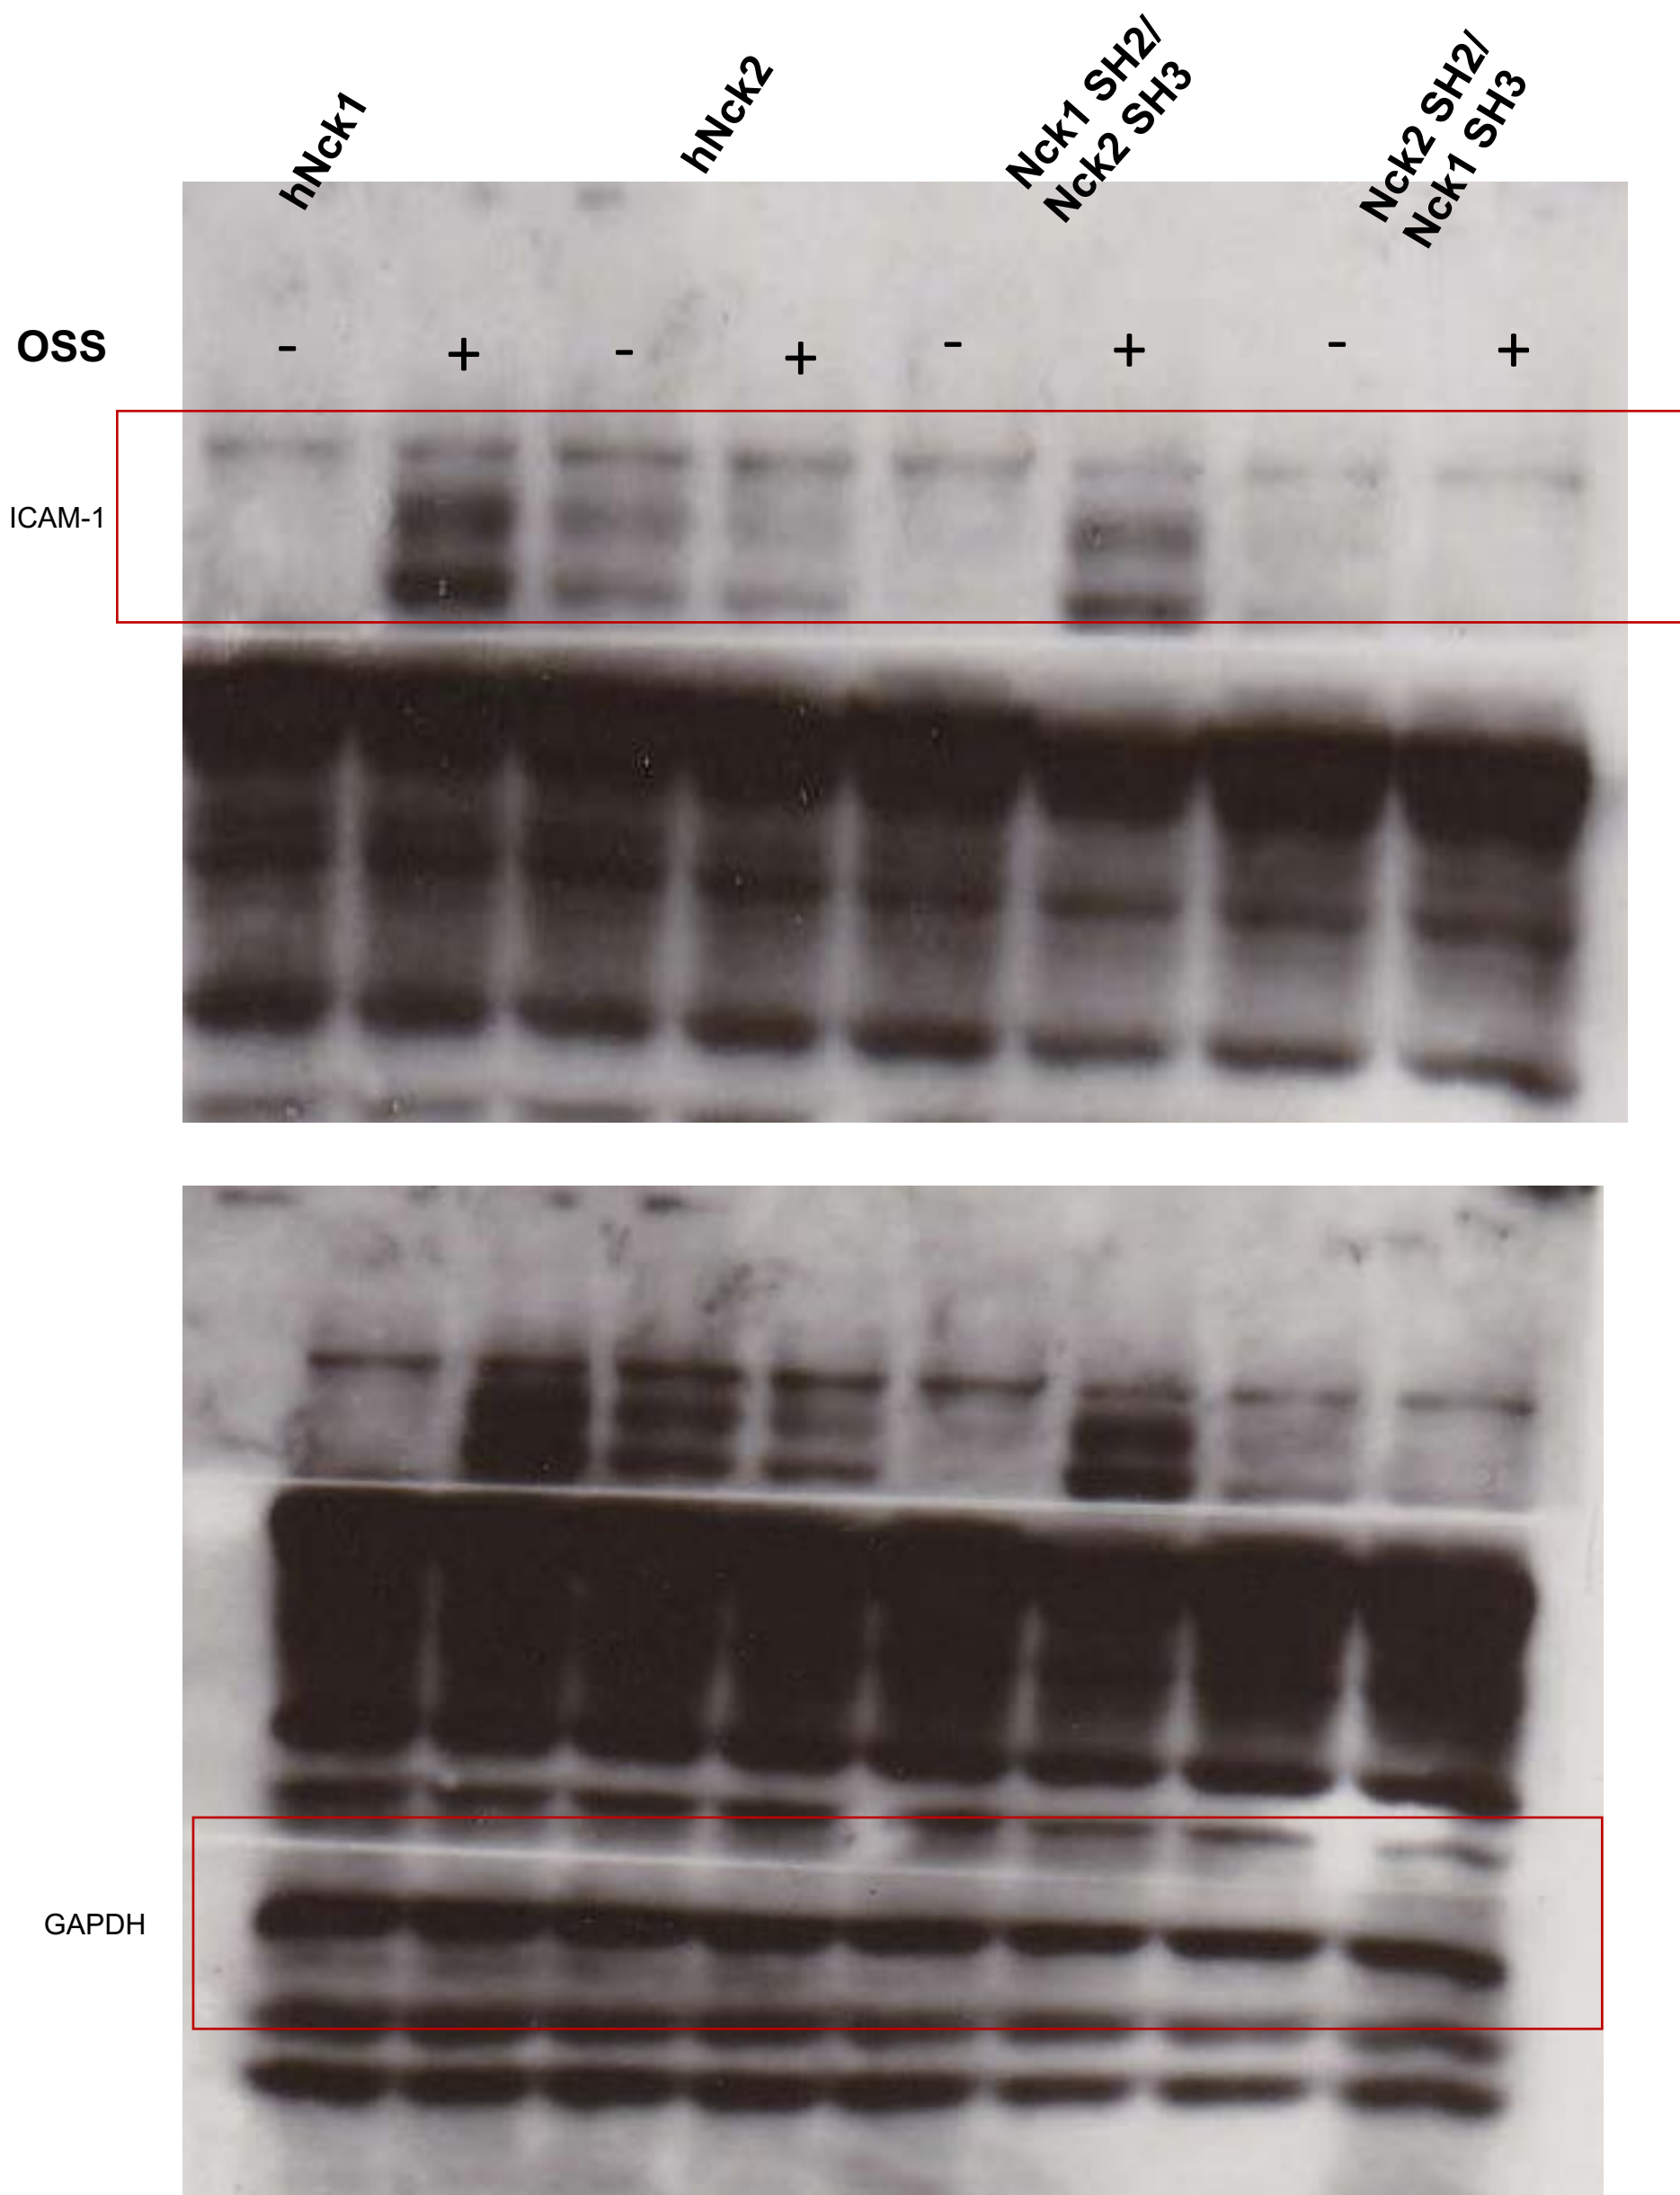

Supplement: sd1 [file 1]
